# Supplementary material
Source: publisher figshare collection journal article supplement (https://rs.figshare.com/ndownloader/files/9637849)

**Supplementary Information**

**Biotransformation of labdane and halimane diterpenoids by two filamentous fungi strains**

Afif F. Monteiro,a Cláudia Seidl,b Vanessa G. P. Severino,c Carmen Lúcia Cardoso,b and Ian Castro-Gamboa*a

*a. Núcleo de Bioensaios, Biossíntese e Ecofisiologia de Produtos Naturais (NuBBE), Universidade Estadual Paulista (UNESP), Instituto de Química, Departamento de Química Orgânica, Francisco Degni 55, Araraquara, 14800-900, Brazil*

*b. Departamento de Química, Grupo de Cromatografia de Bioafinidade e Produtos Naturais, Faculdade de Filosofia, Ciências e Letras de Ribeirão Preto, Universidade de São Paulo, Ribeirão Preto, 14040-901, SãoPaulo, Brazil*

*c. Universidade Federal de Goiás (UFG), Instituto de Química, Campus Samambaia, Goiânia, 74690-900, Brazil*

* Corresponding author: Tel/Fax: +55 16 3301-9664/3301-9692. E-mail: ian.castro@gmail.com

**Contents**

**S1.** 1H NMR (600.13 MHz, CD3OD) spectrum of Compound **1**.

**S2.** 13C NMR (150.9 MHz, CD3OD) spectrum of Compound **1**.

**S3.** 1H NMR (600.13 MHz, CD3OD) spectrum of Compound **2**.

**S4.** 13C NMR (150.9 MHz, CD3OD) spectrum of Compound **2**.

**S5.** HR-ESI-MS spectrum of Compound **3** (negative ion mode).

**S6.** 1H NMR (600.13 MHz, CD3OD) spectrum of Compound **3**.

**S7.** 13C NMR (150.9 MHz, CD3OD) spectrum of Compound **3**.

**S8.** HSQC (600.13 MHz, CD3OD) spectrum of Compound **3**.

**S9.** HMBC (600.13 MHz, CD3OD) spectrum of Compound **3**.

**S10.** HR-ESI-MS spectrum of Compound **4** (negative ion mode).

**S11.** 1H NMR (600.13 MHz, CDCl3) spectrum of Compound **4**.

**S12.** 13C NMR (150.9 MHz, CDCl3) spectrum of Compound **4**.

**S13.** HSQC (600.13 MHz, CDCl3) spectrum of Compound **4**.

**S14.** HMBC (600.13 MHz, CDCl3) spectrum of Compound **4**.

**S15.** HR-ESI-MS spectrum of Compound **5** (negative ion mode).

**S16.** 1H NMR (600.13 MHz, CDCl3) spectrum of Compound **5**.

**S17.** 13C NMR (150.9 MHz, CDCl3) spectrum of Compound **5**.

**S18.** HSQC (600.13 MHz, CDCl3) spectrum of Compound **5**.

**S19.** HMBC (600.13 MHz, CDCl3) spectrum of Compound **5**.

**S20.** HR-ESI-MS spectrum of Compound **6** (negative ion mode).

**S21.** 1H NMR (600.13 MHz, CDCl3) spectrum of Compound **6**.

**S22.** 13C NMR (150.9 MHz, CDCl3) spectrum of Compound **6**.

**S23.** HSQC (600.13 MHz, CDCl3) spectrum of Compound **6**.

**S24.** HMBC (600.13 MHz, CDCl3) spectrum of Compound **6**.

**S25.** HR-ESI-MS spectrum of Compound **7** (negative ion mode).

**S26.** 1H NMR (600.13 MHz, CD3OD) spectrum of Compound **7**.

**S27.** 13C NMR (150.9 MHz, CD3OD) spectrum of Compound **7**.

**S28.** HSQC (600.13 MHz, CD3OD) spectrum of Compound **7**.

**S29.** HMBC (600.13 MHz, CD3OD) spectrum of Compound **7**.

**S30.** HR-ESI-MS spectrum of Compound **8** (negative ion mode).

**S31.** 1H NMR (600.13 MHz, CD3OD) spectrum of Compound **8**.

**S32.** 13C NMR (150.9 MHz, CD3OD) spectrum of Compound **8**.

**S33.** HSQC (600.13 MHz, CD3OD) spectrum of Compound **8**.

**S34.** HMBC (600.13 MHz, CD3OD) spectrum of Compound **8**.

**S1.** 1H NMR (600.13 MHz, CD3OD) spectrum of Compound **1**.


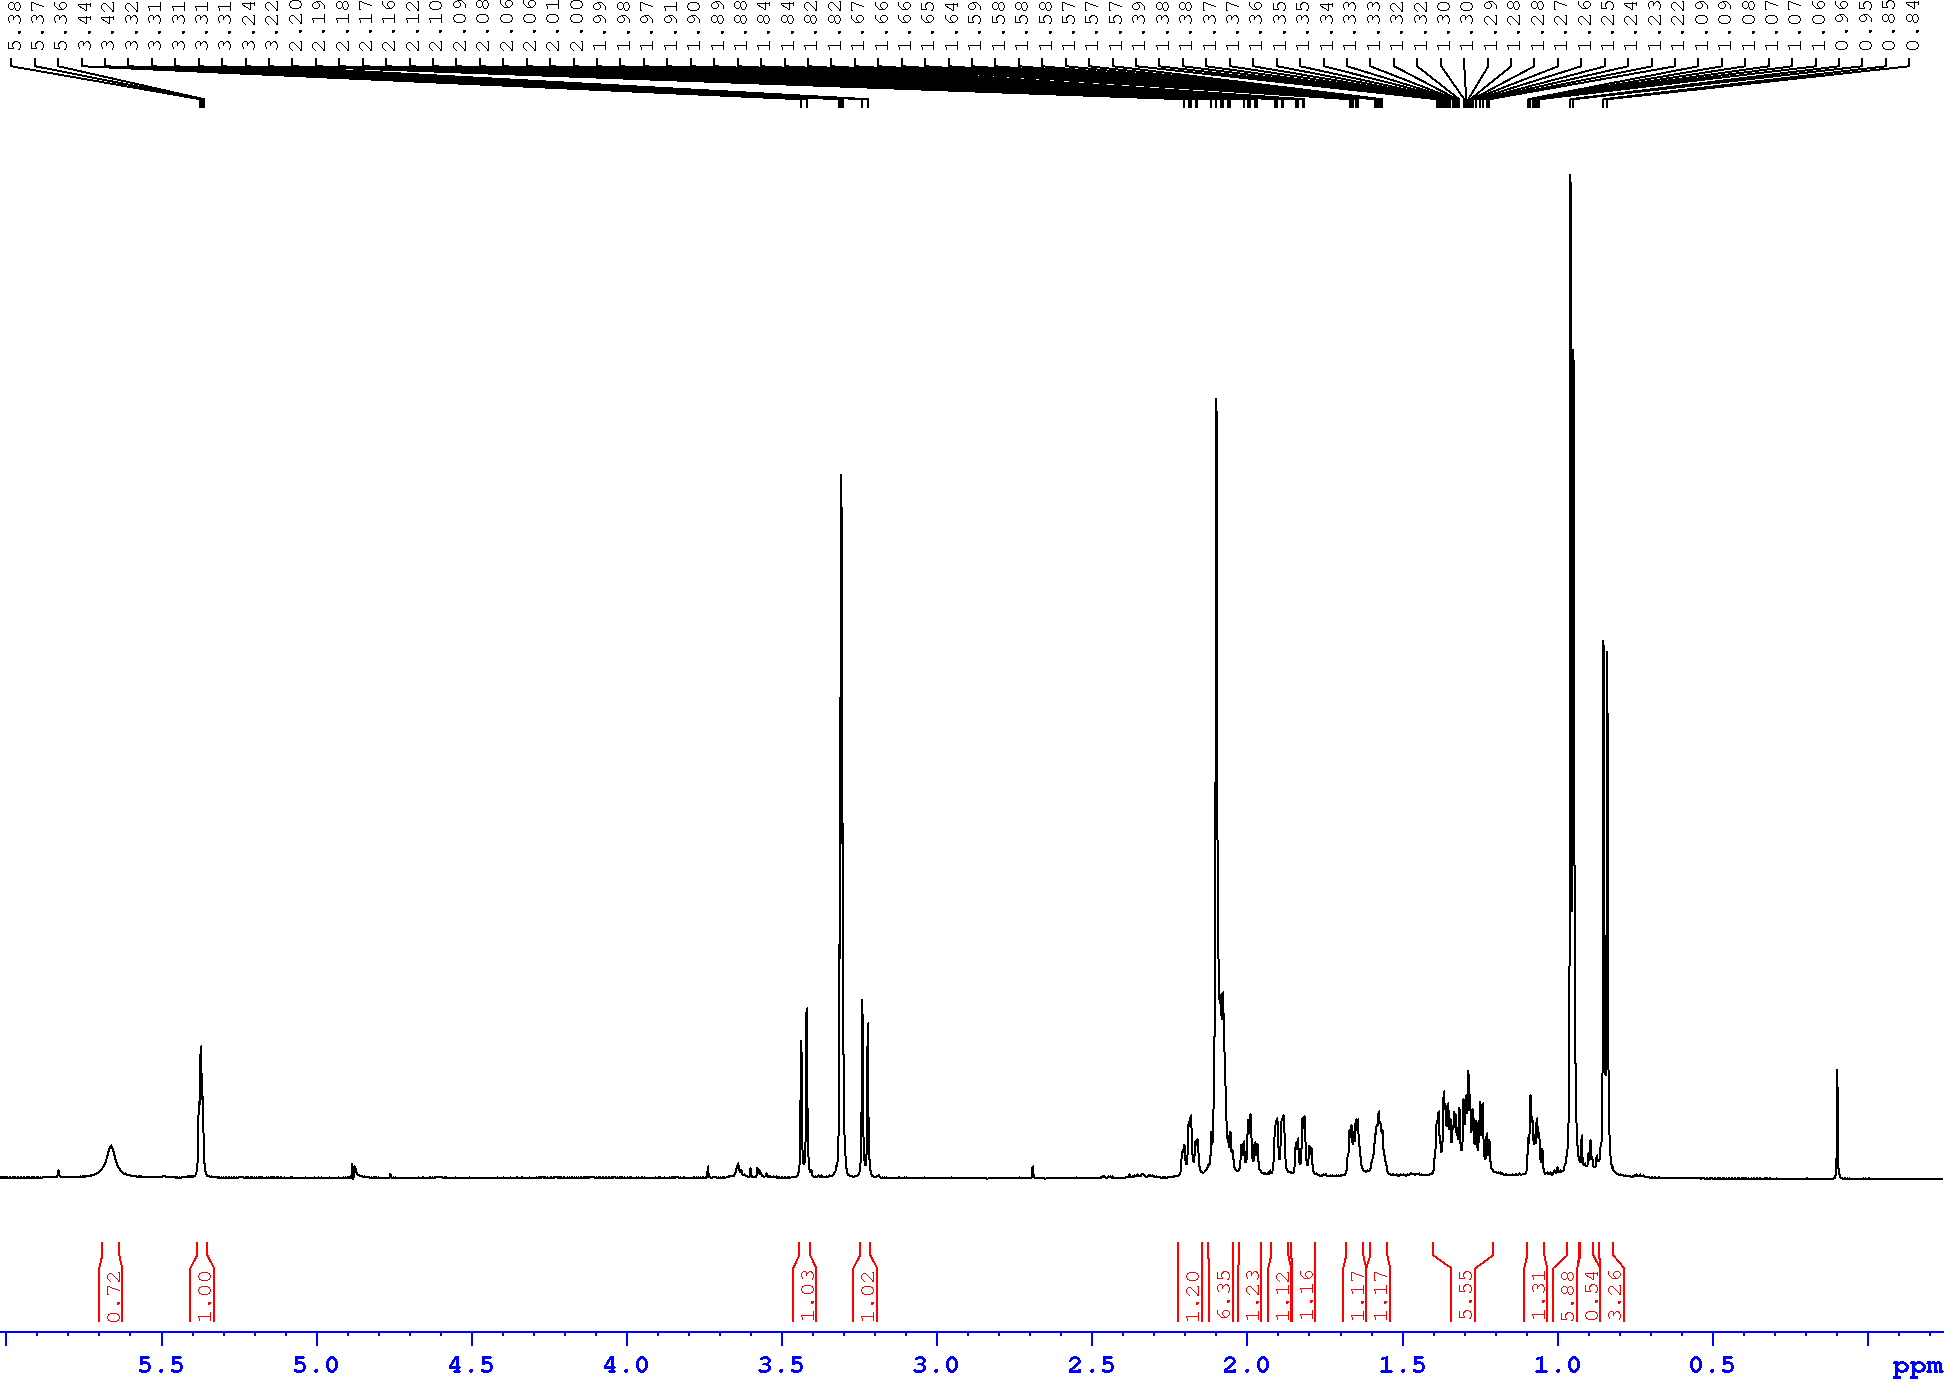


**S2.** 13C NMR (150.9 MHz, CD3OD) spectrum of Compound **1**.


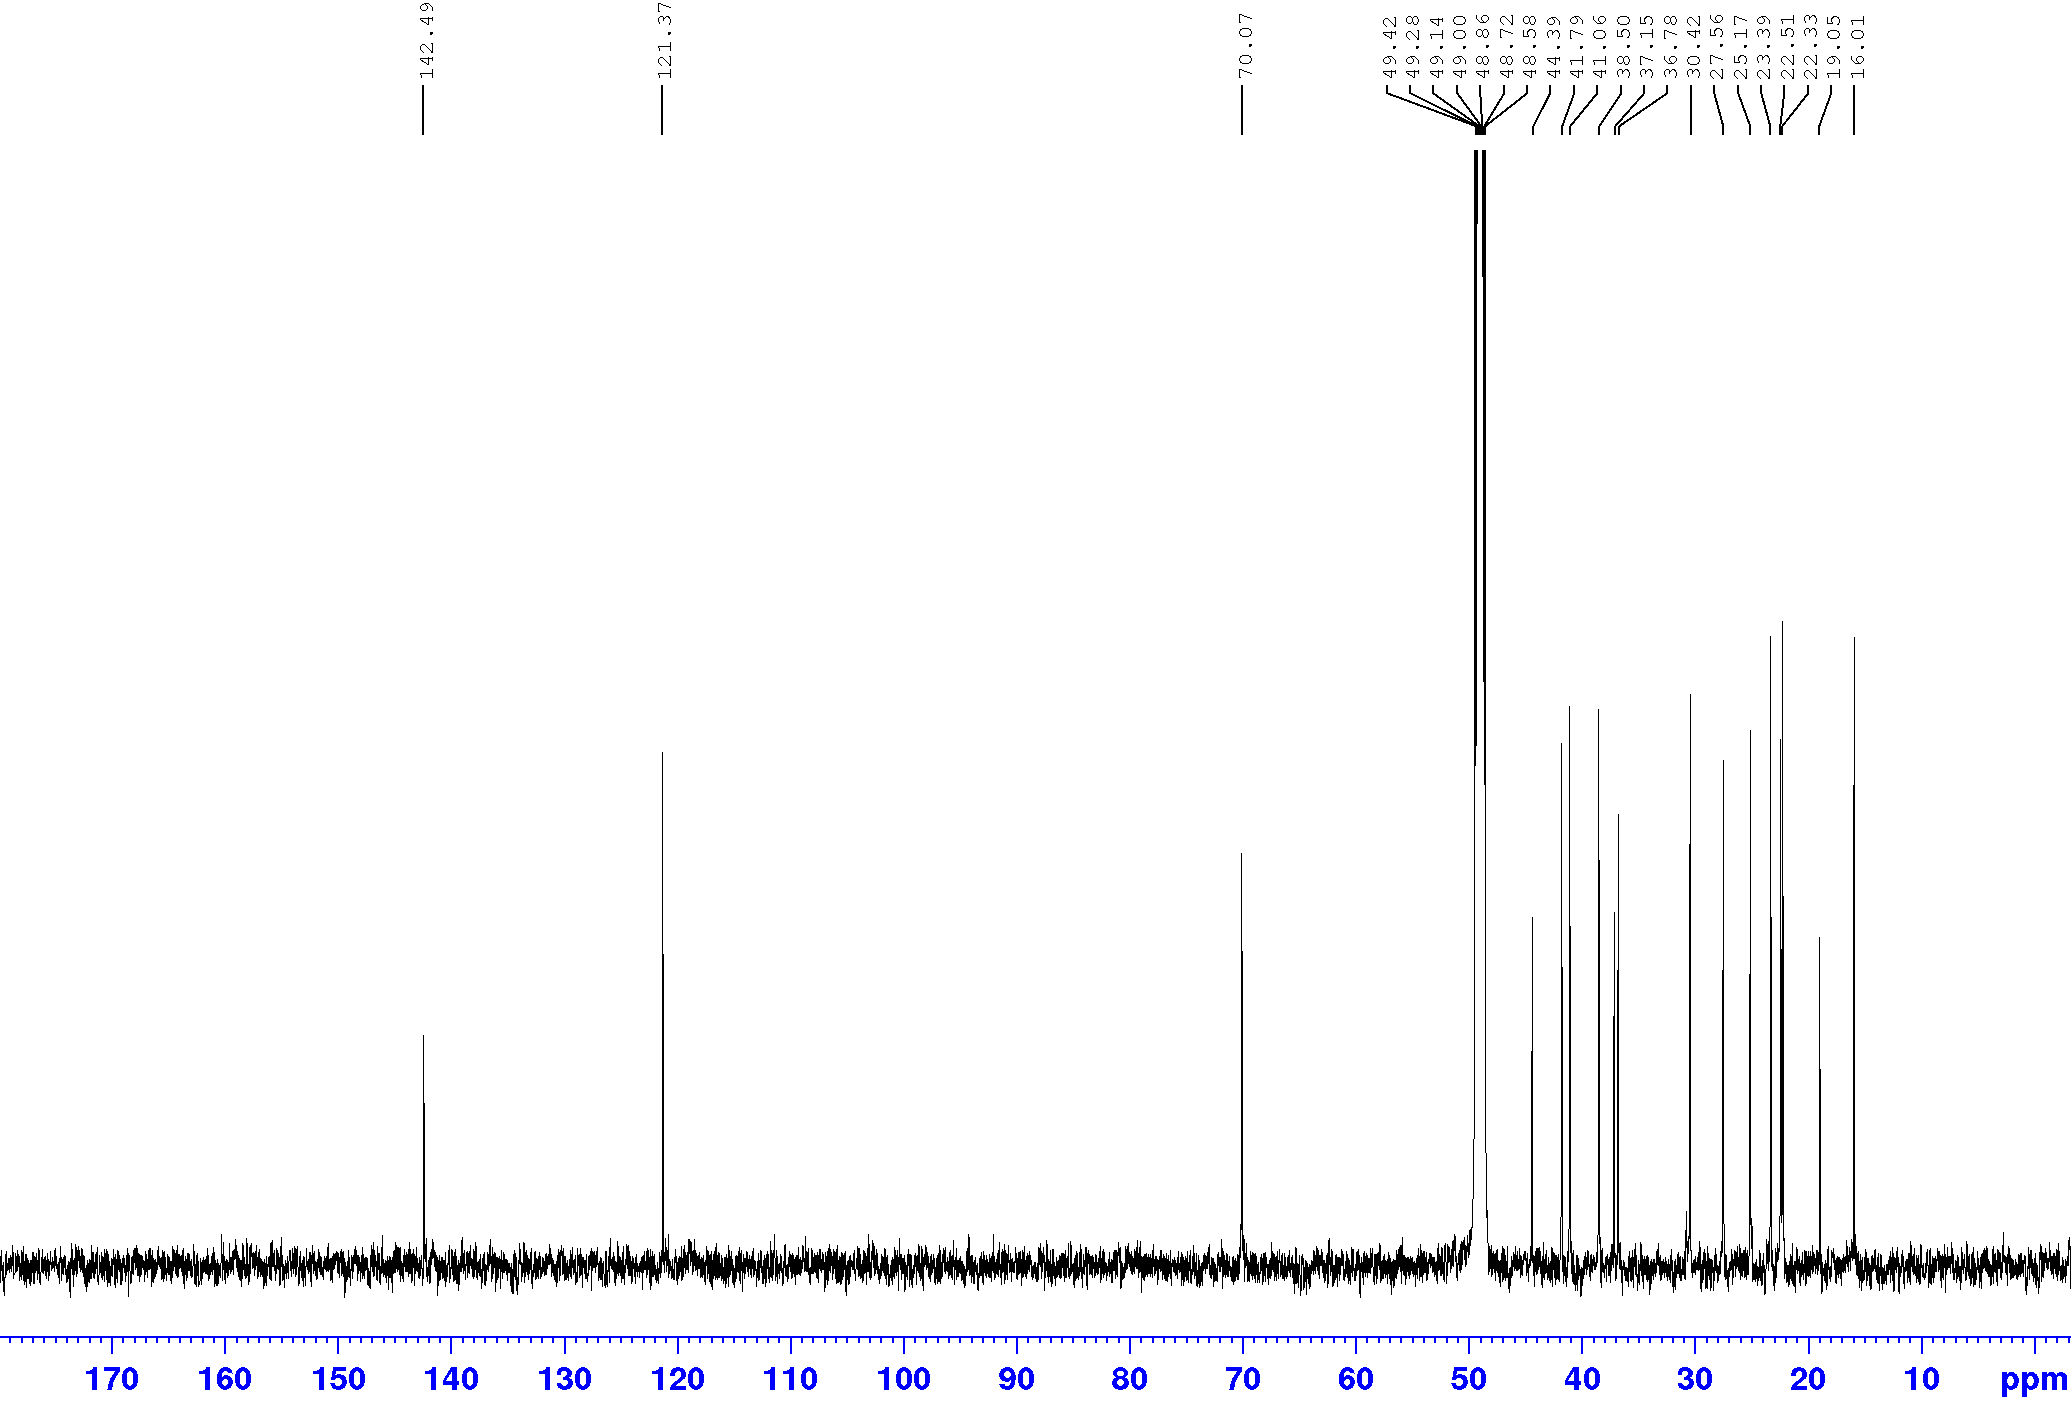


**S3.** 1H NMR (600.13 MHz, CD3OD) spectrum of Compound **2**.


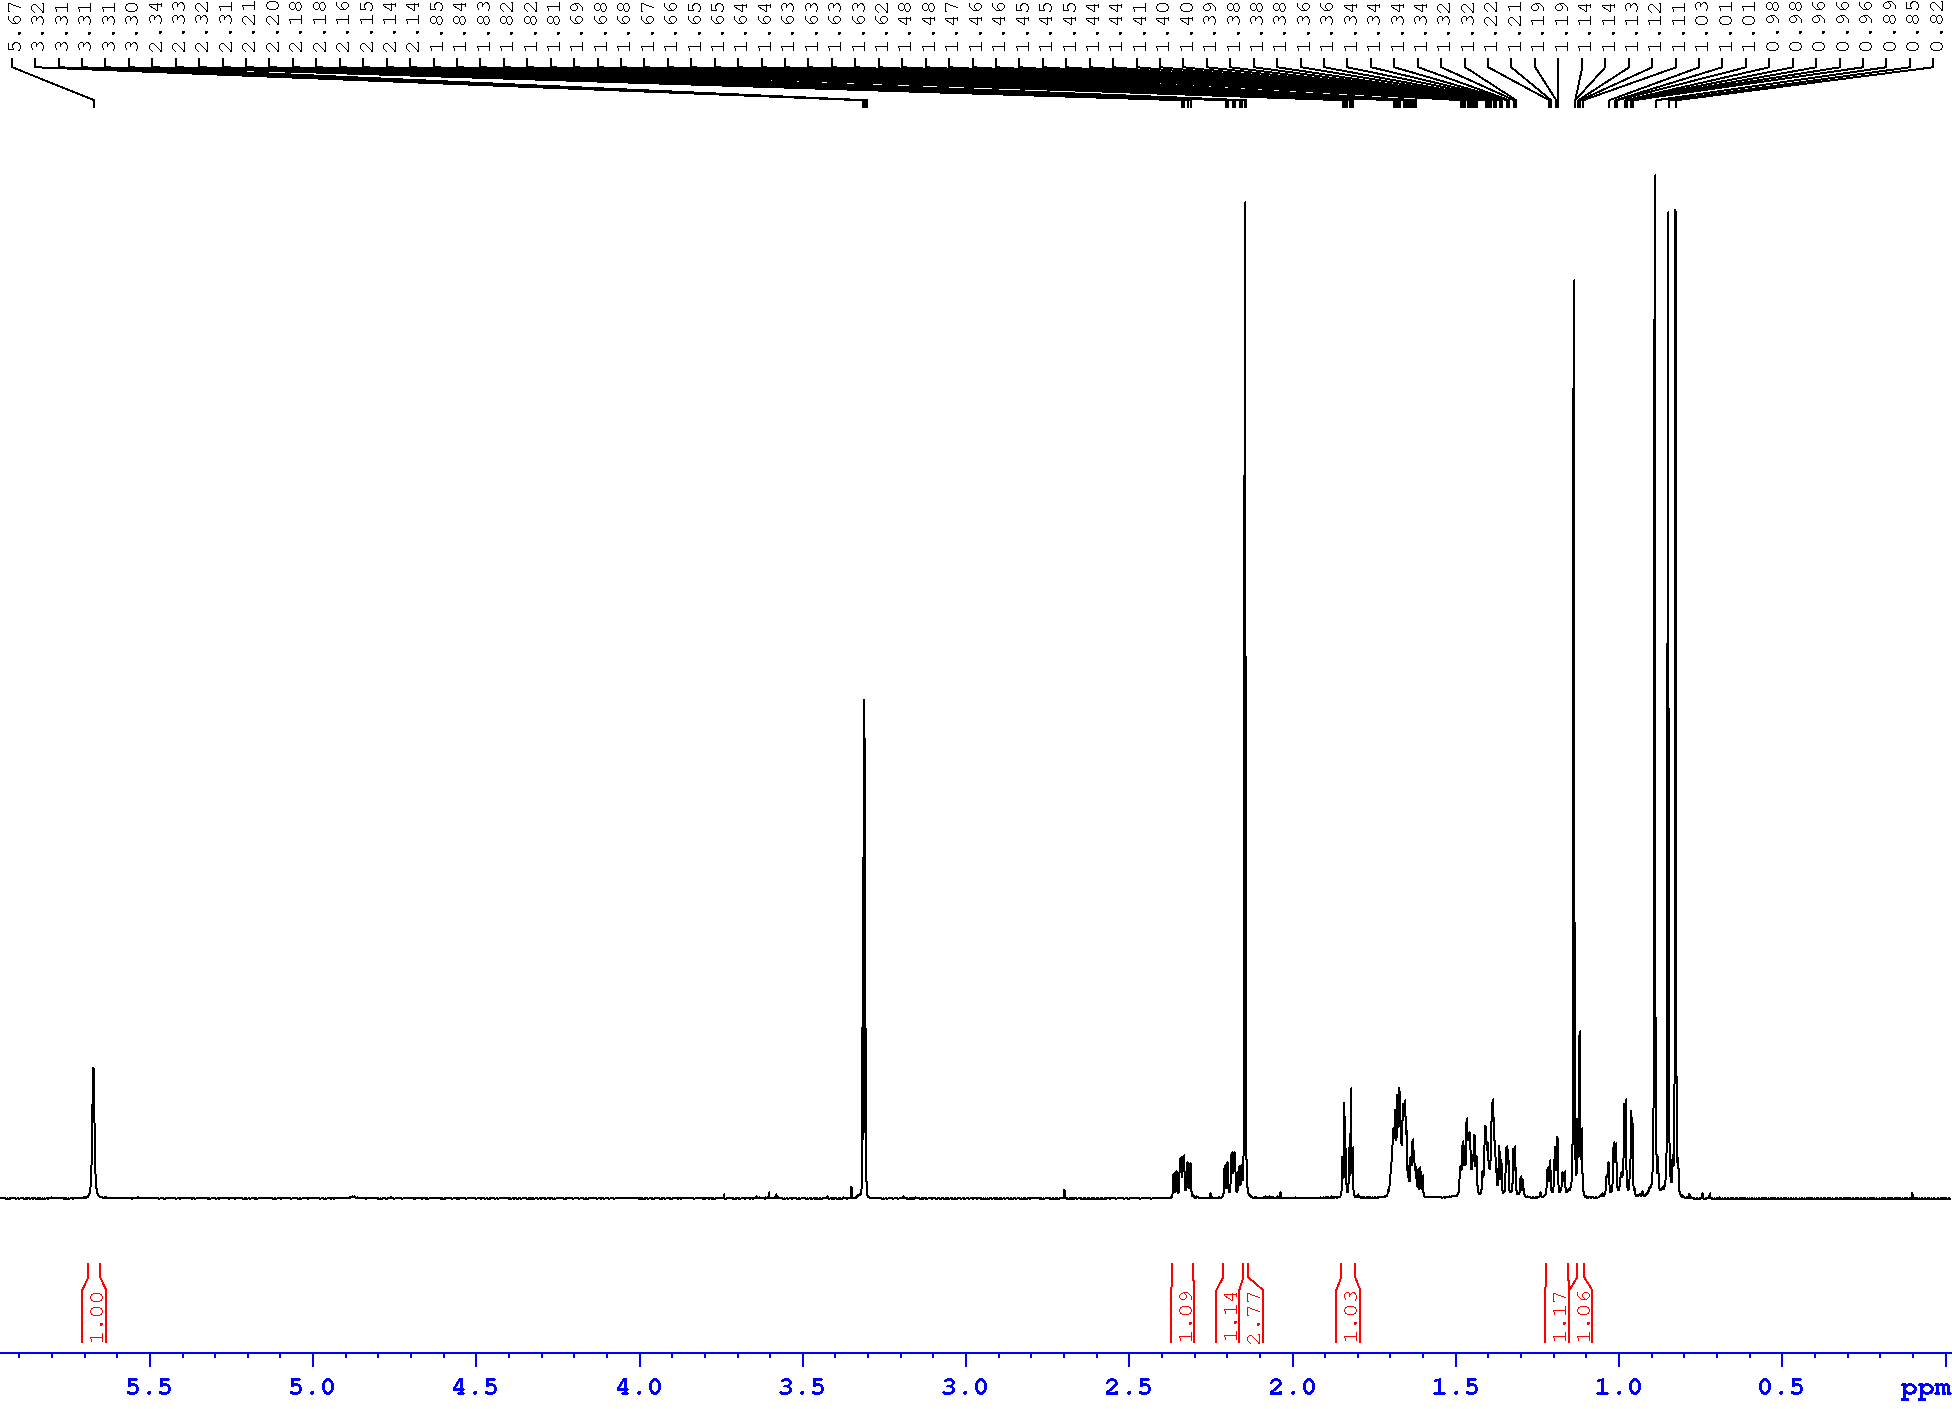


**S4.** 13C NMR (150.9 MHz, CD3OD) spectrum of Compound **2**.


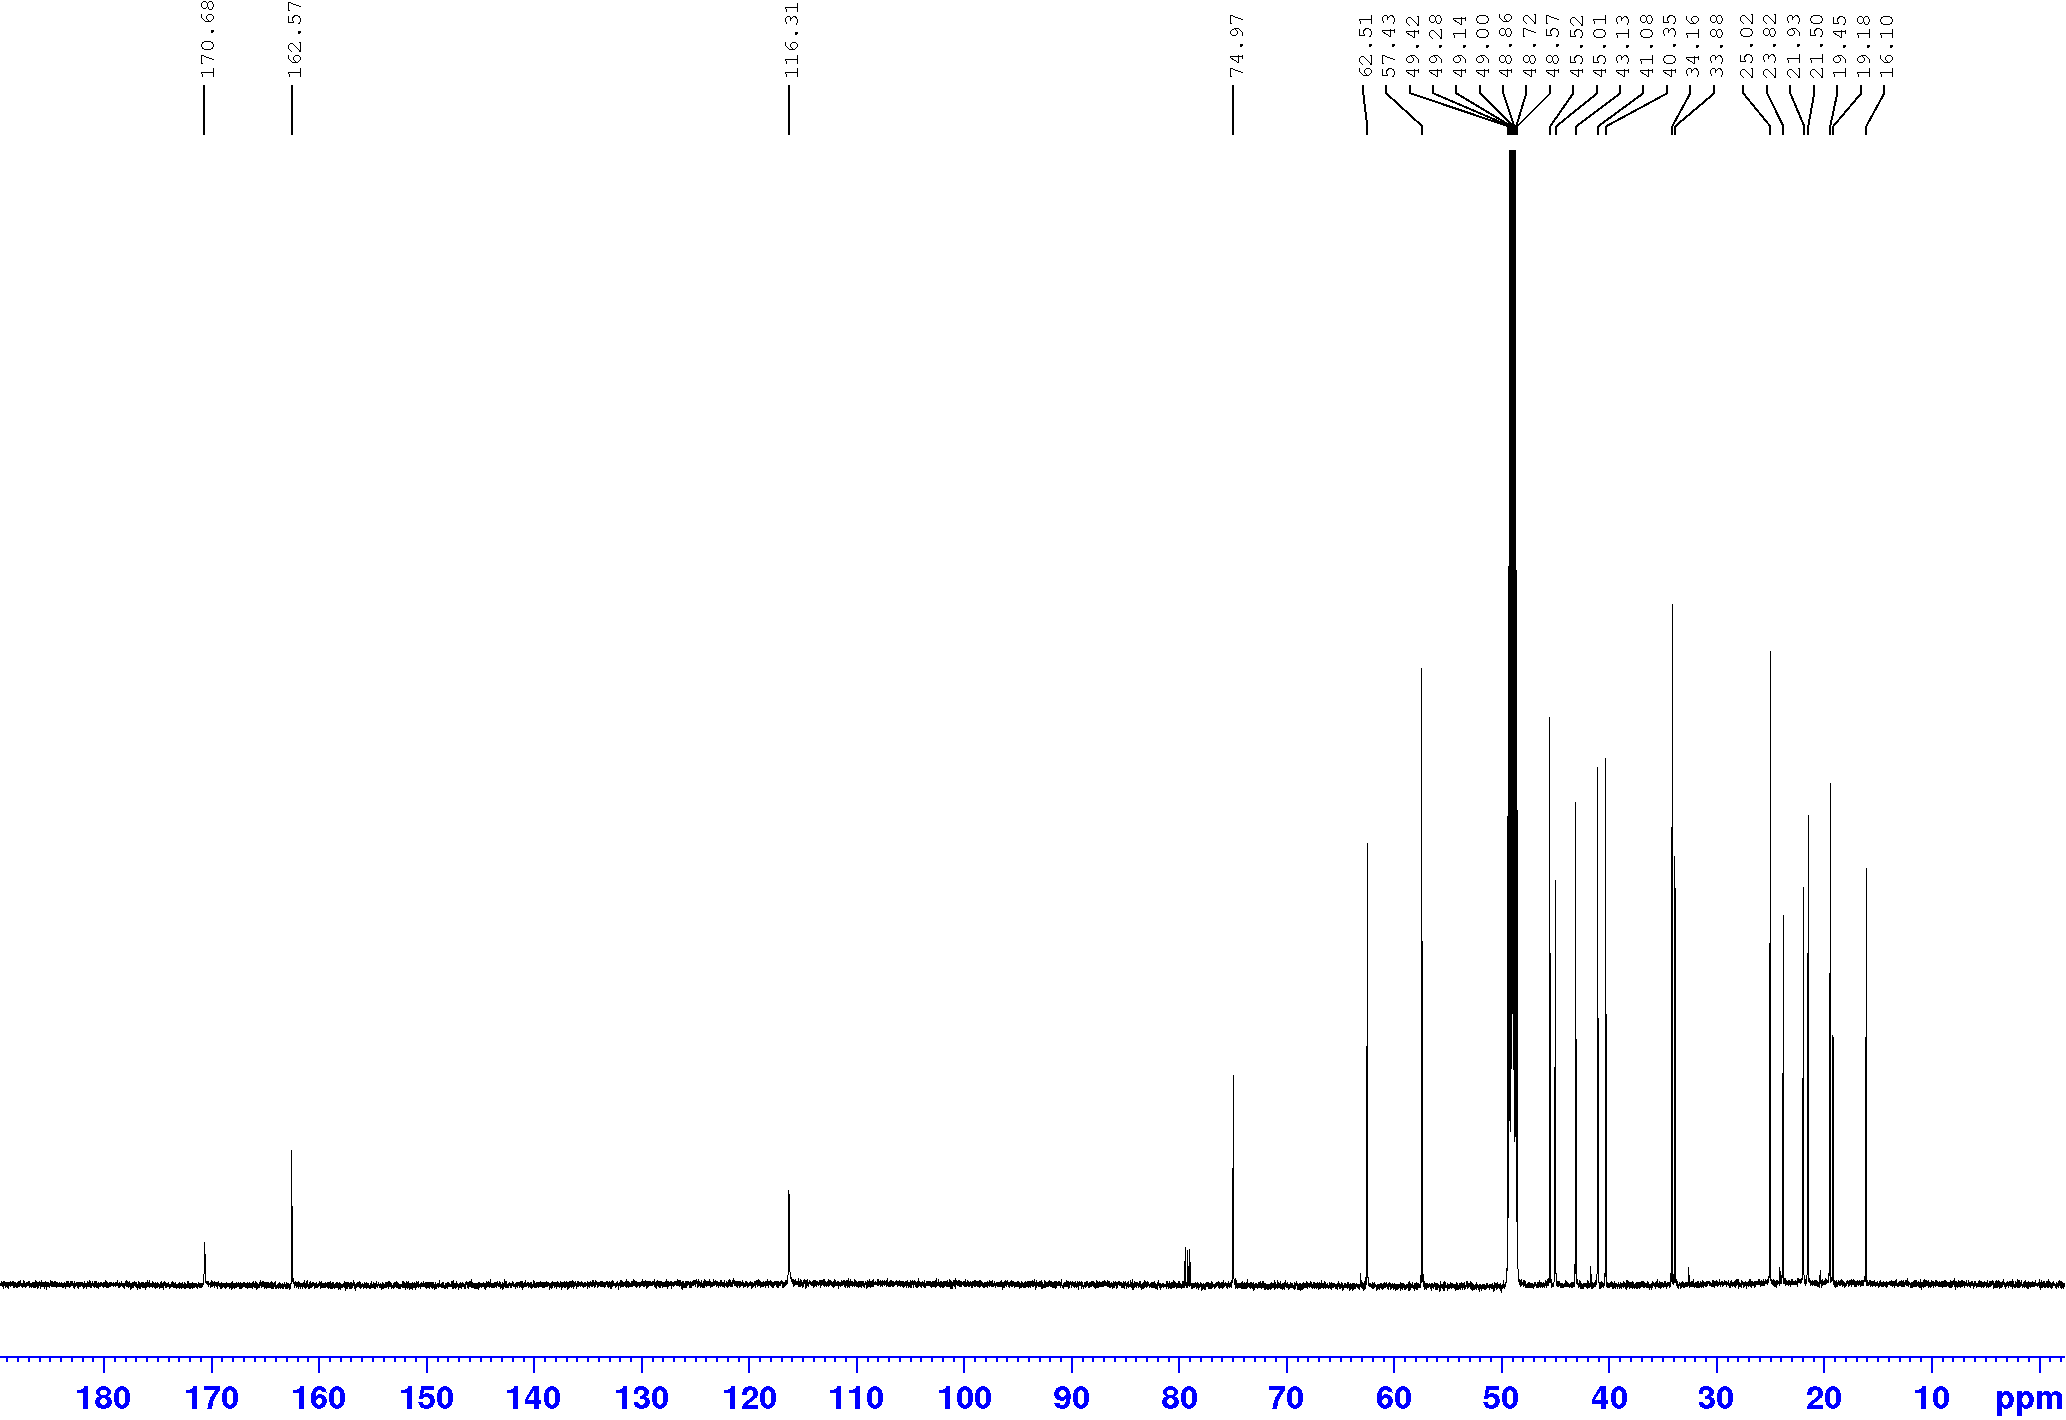


**S5.** HR-ESI-MS spectrum of Compound **3** (negative ion mode).


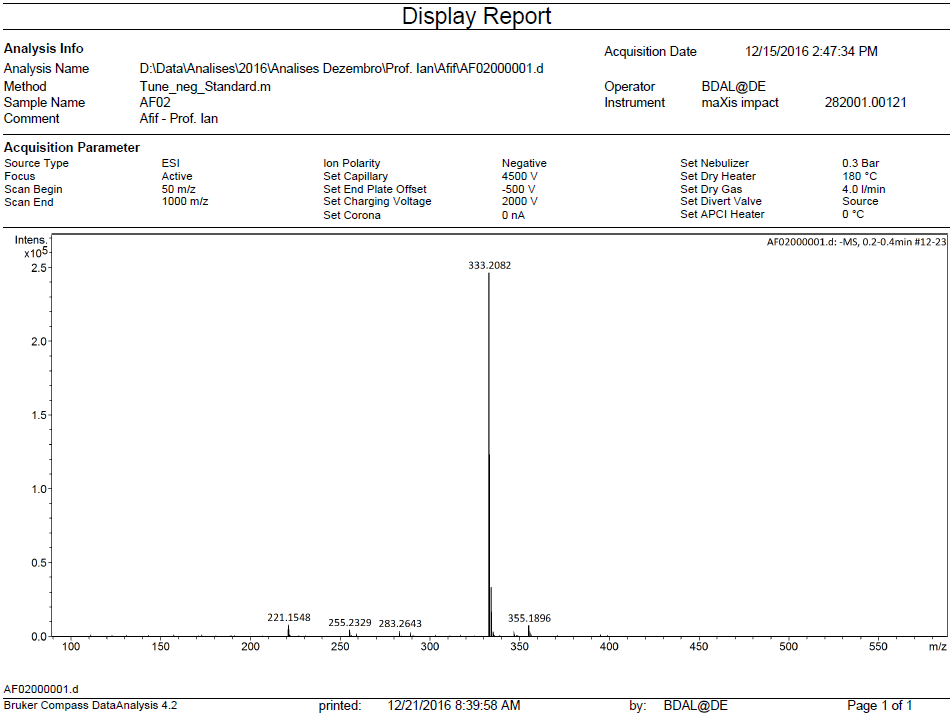


**S6.** 1H NMR (600.13 MHz, CD3OD) spectrum of Compound **3**.


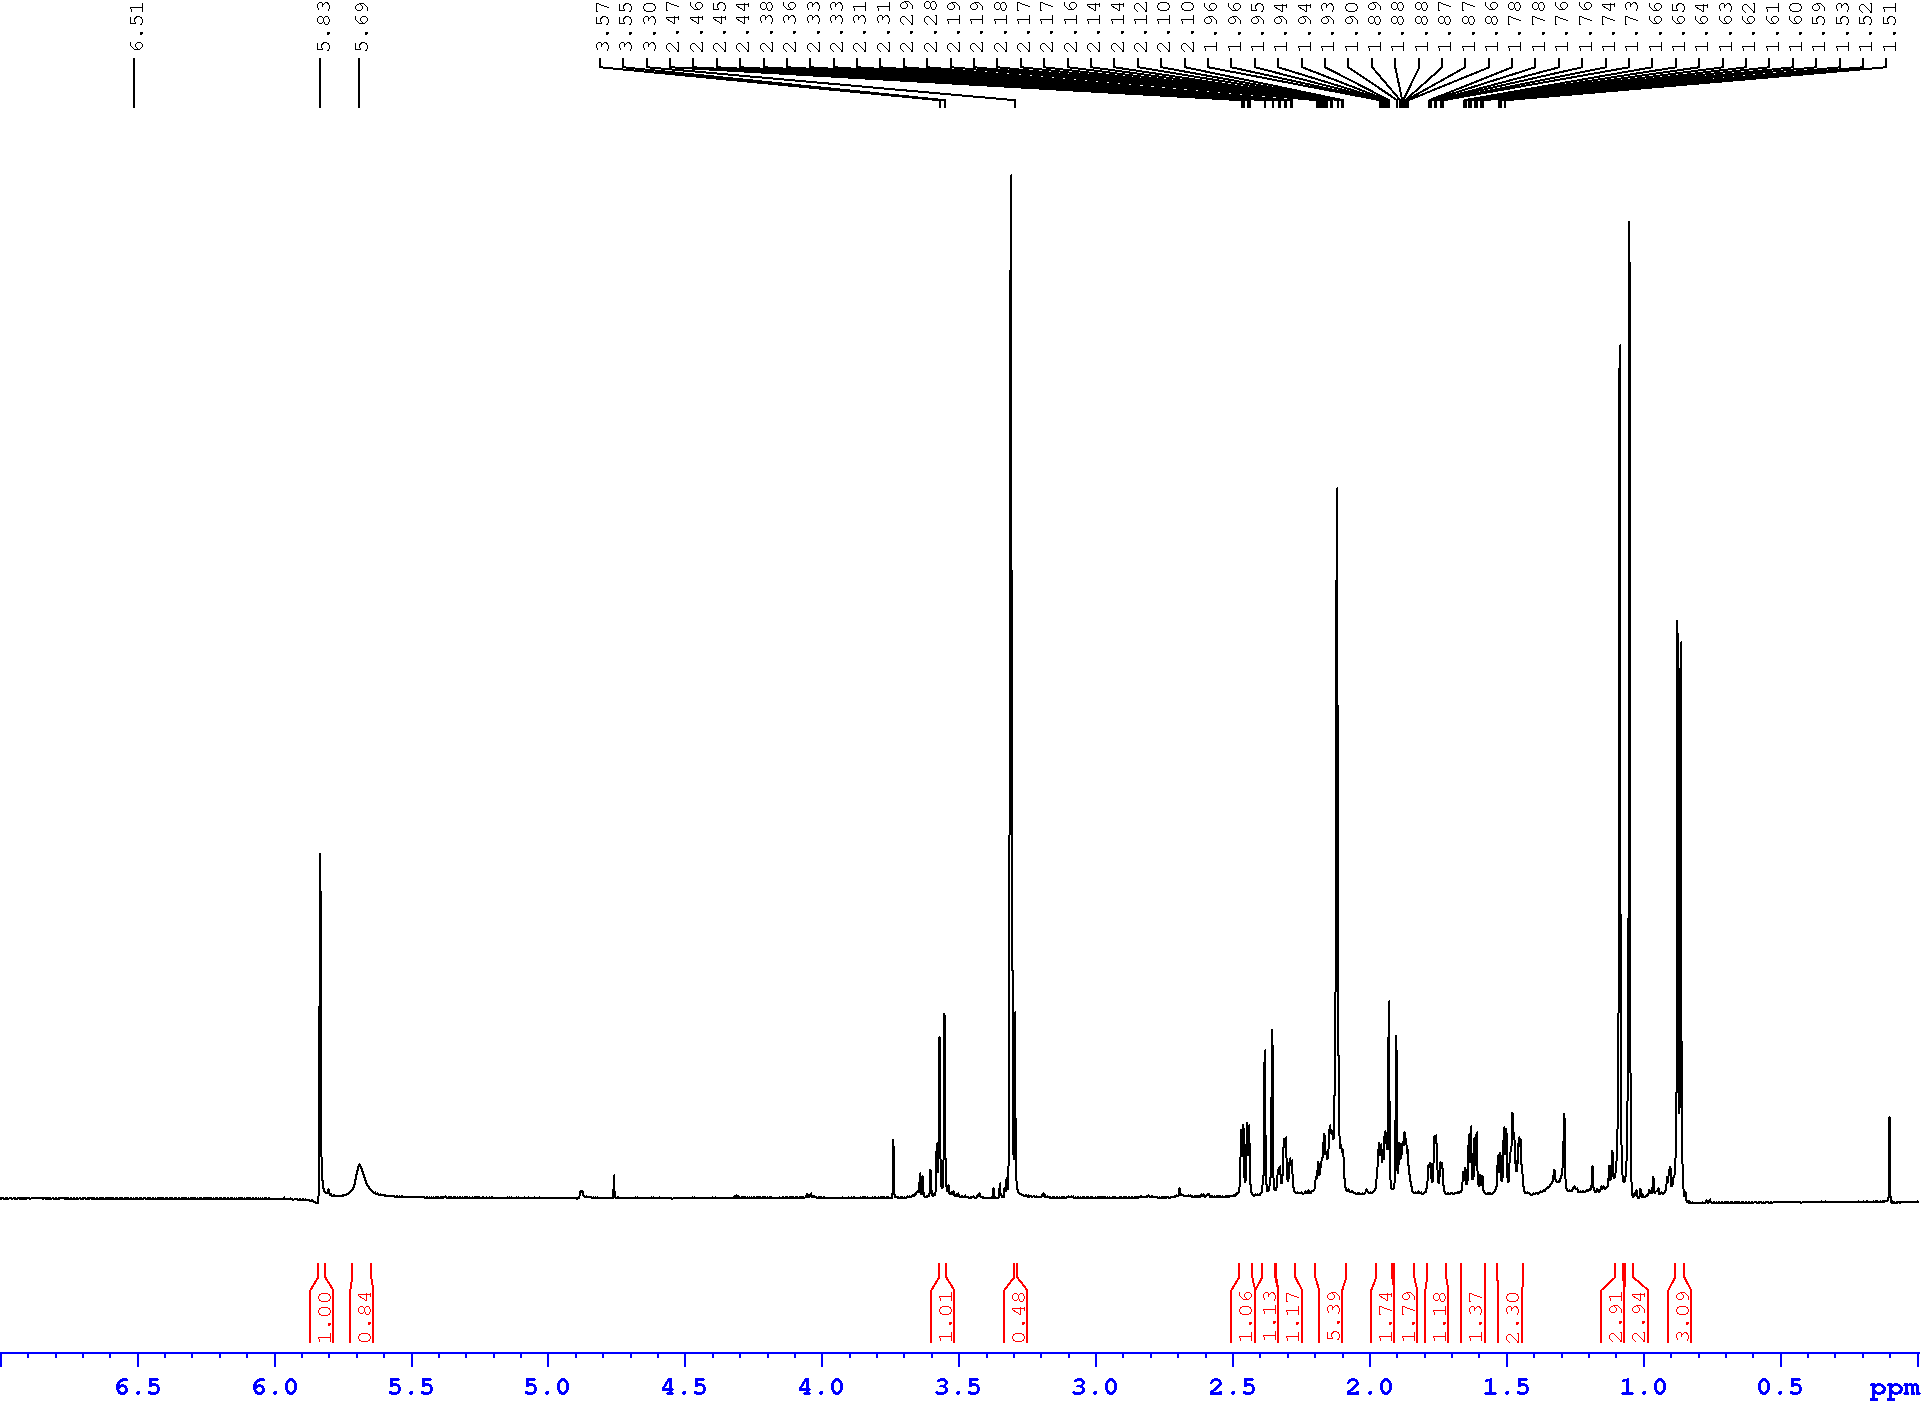


**S7.** 13C NMR (150.9 MHz, CD3OD) spectrum of Compound **3**.


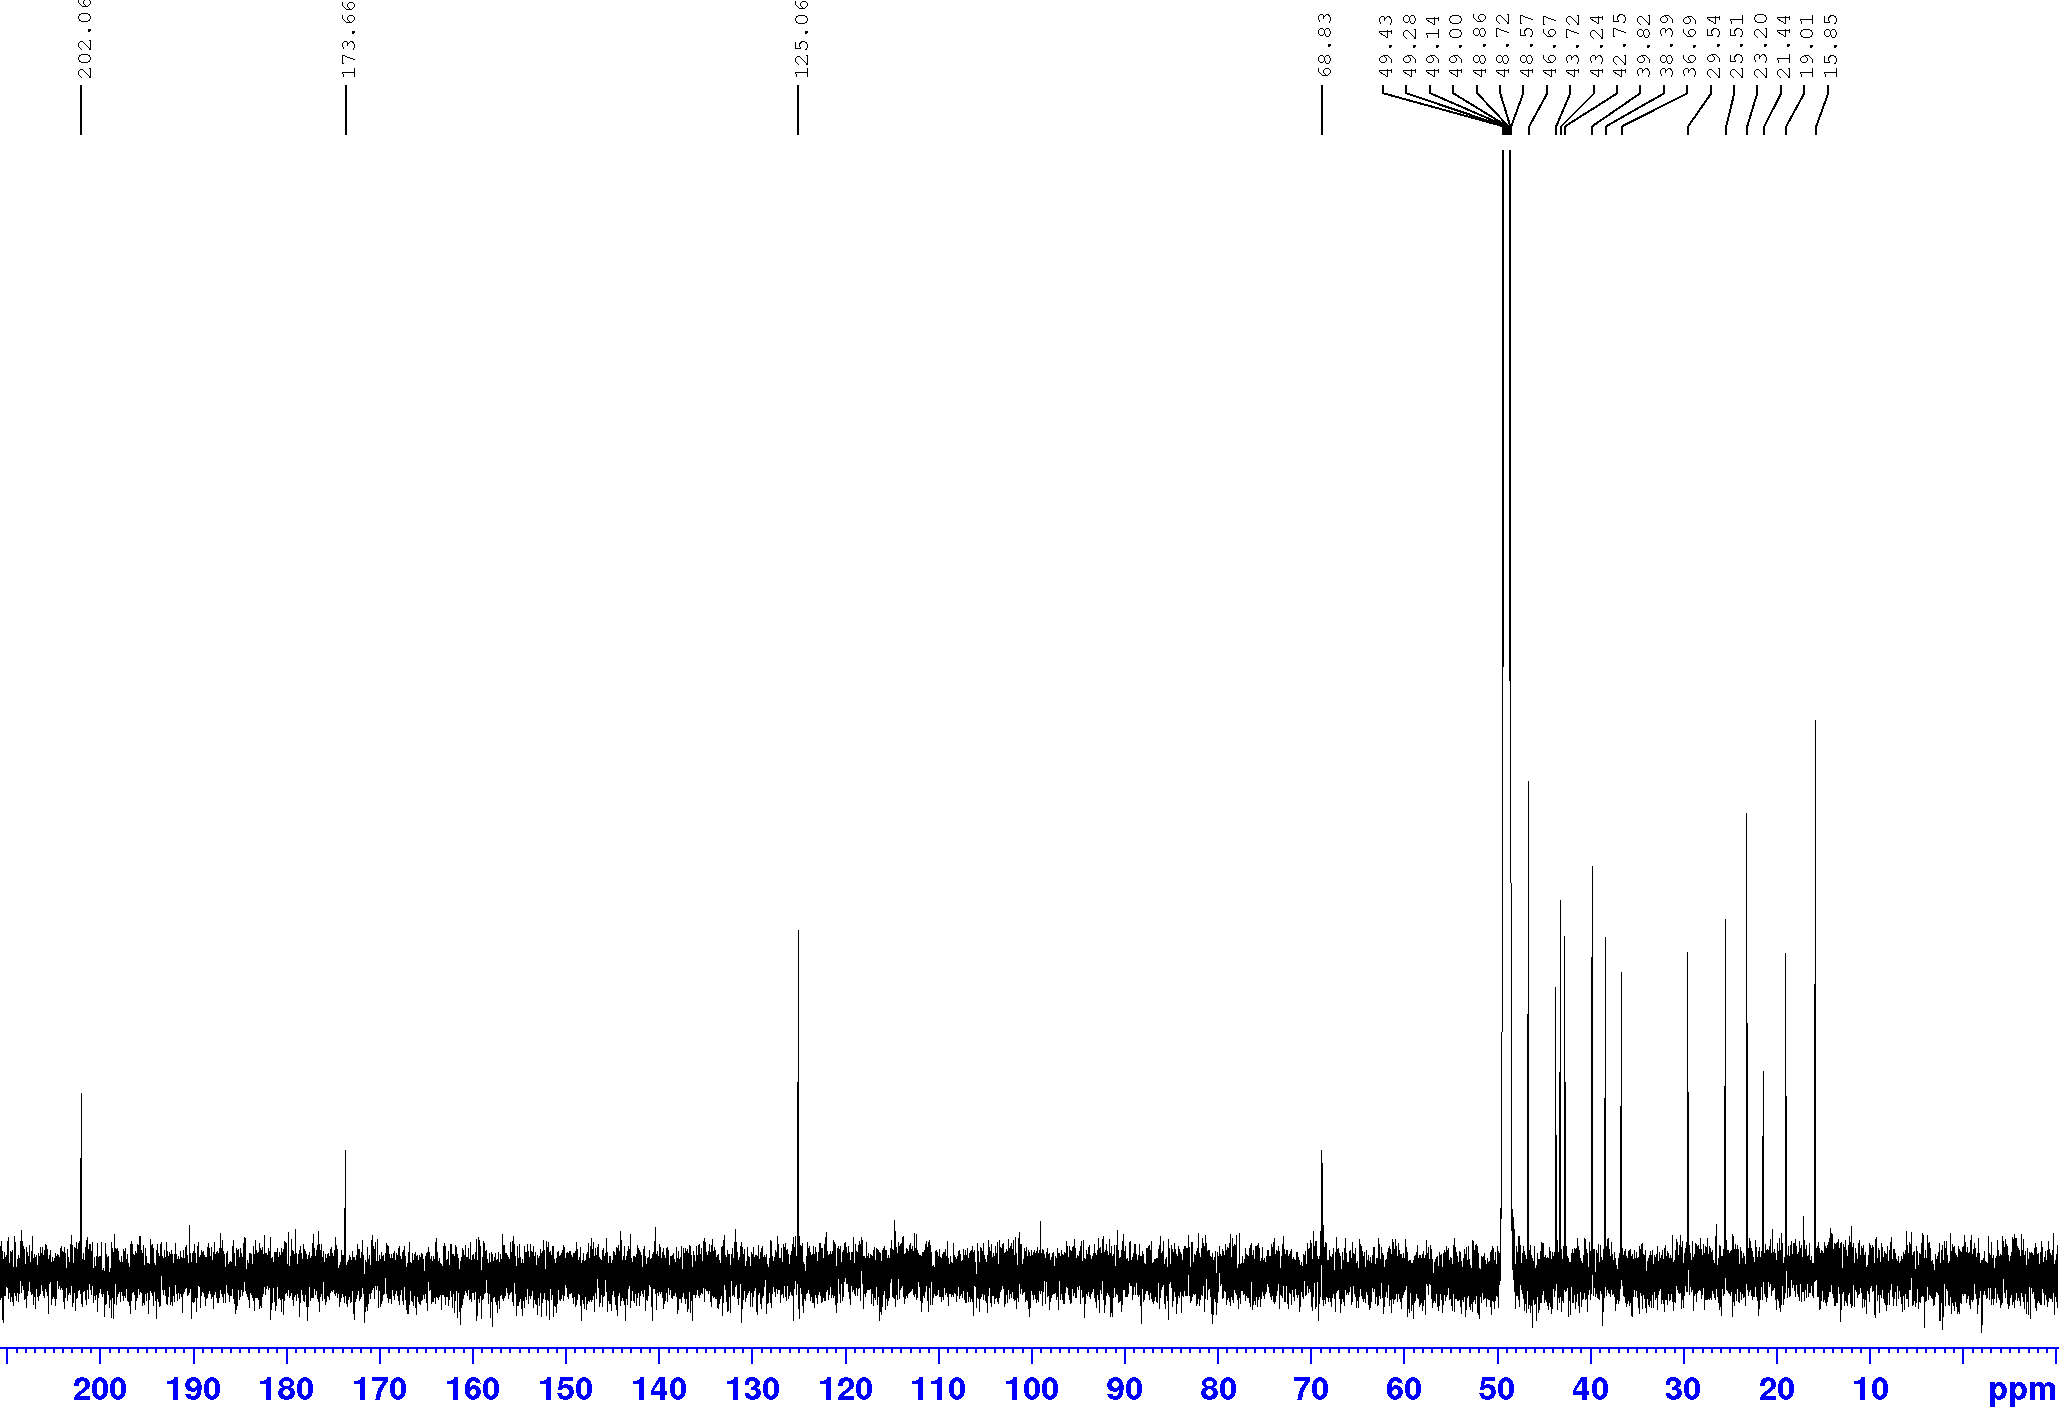


**S8.** HSQC (600.13 MHz, CD3OD) spectrum of Compound **3**.


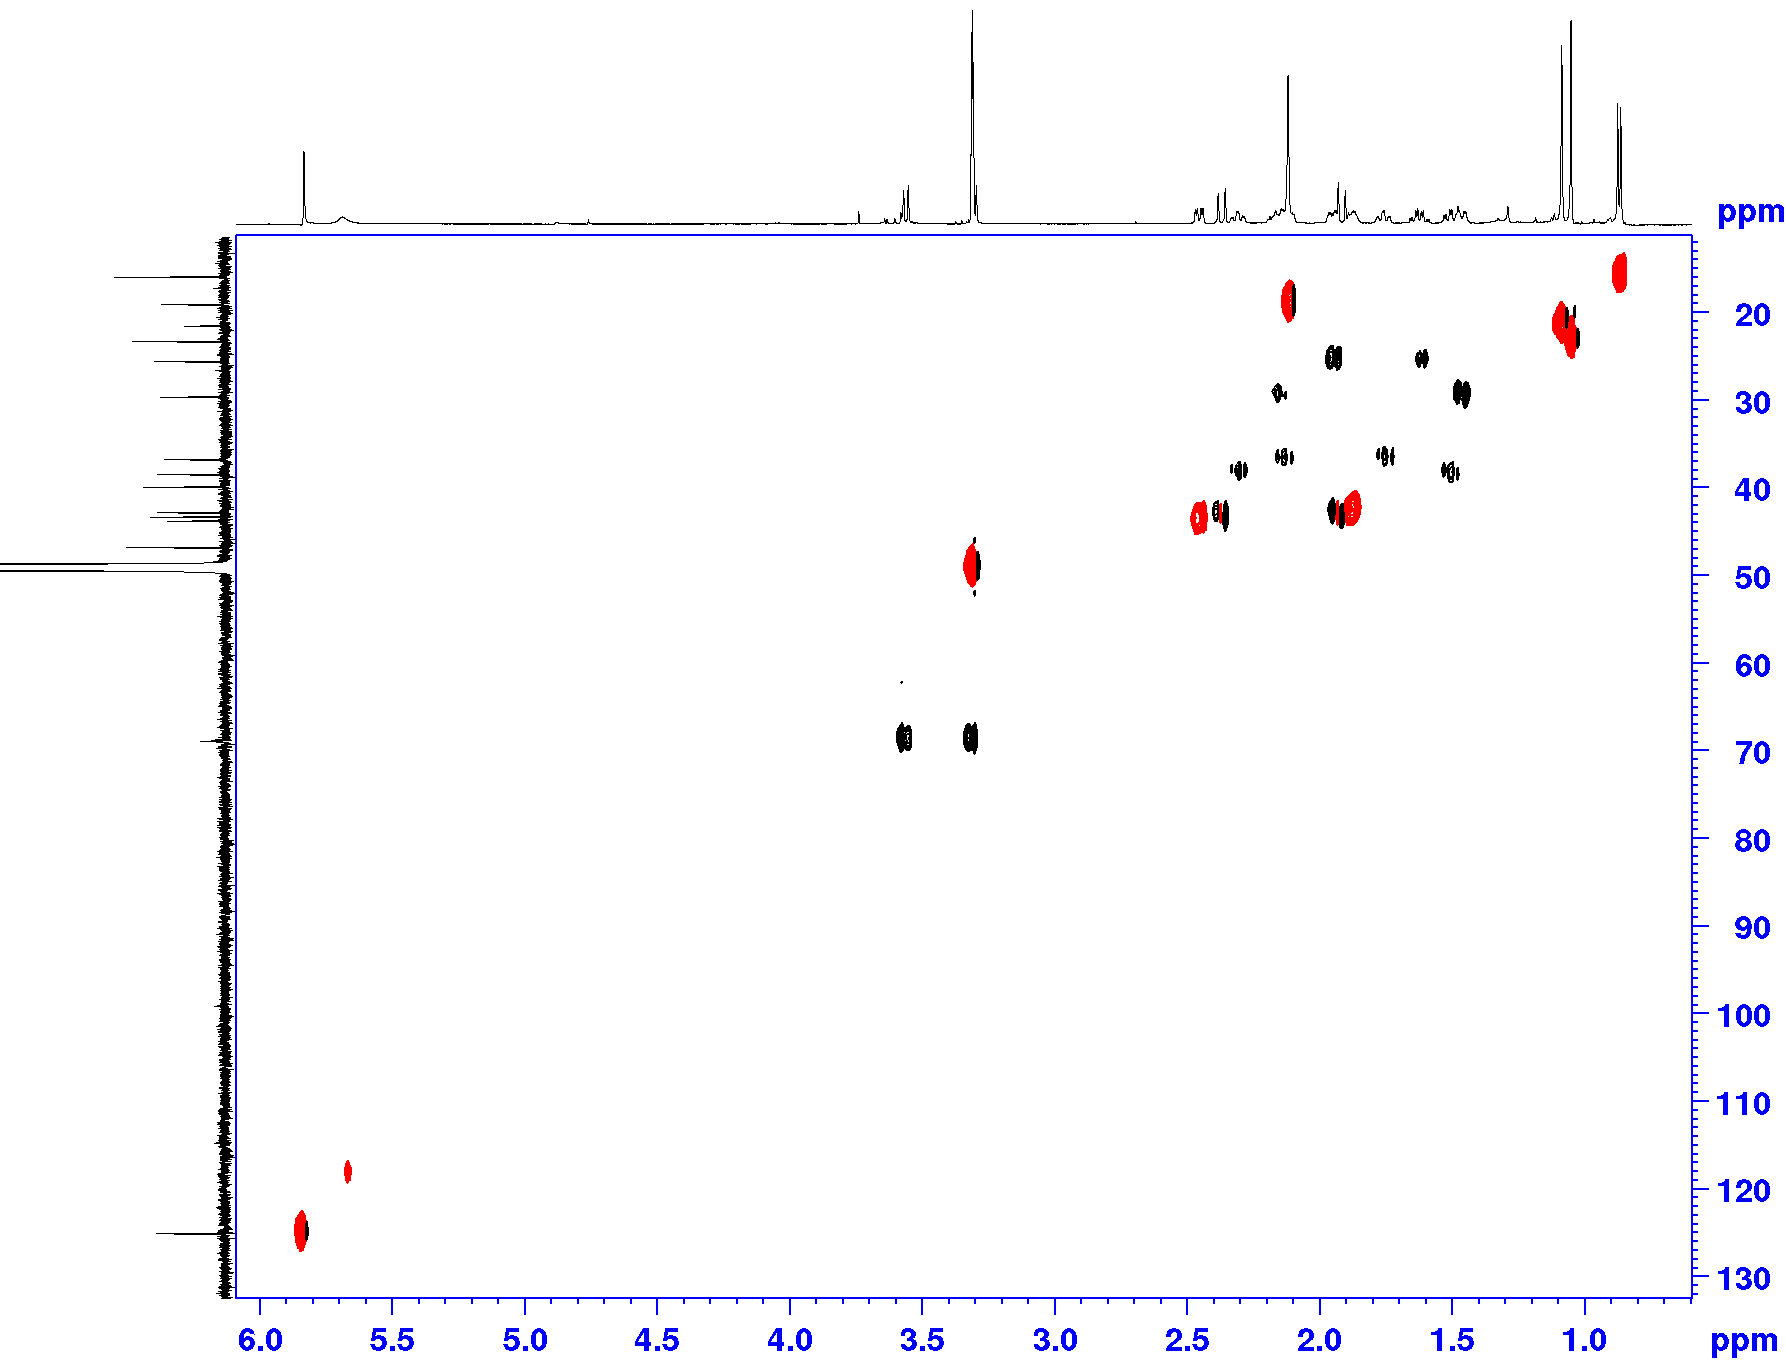


**S9.** HMBC (600.13 MHz, CD3OD) spectrum of Compound **3**.


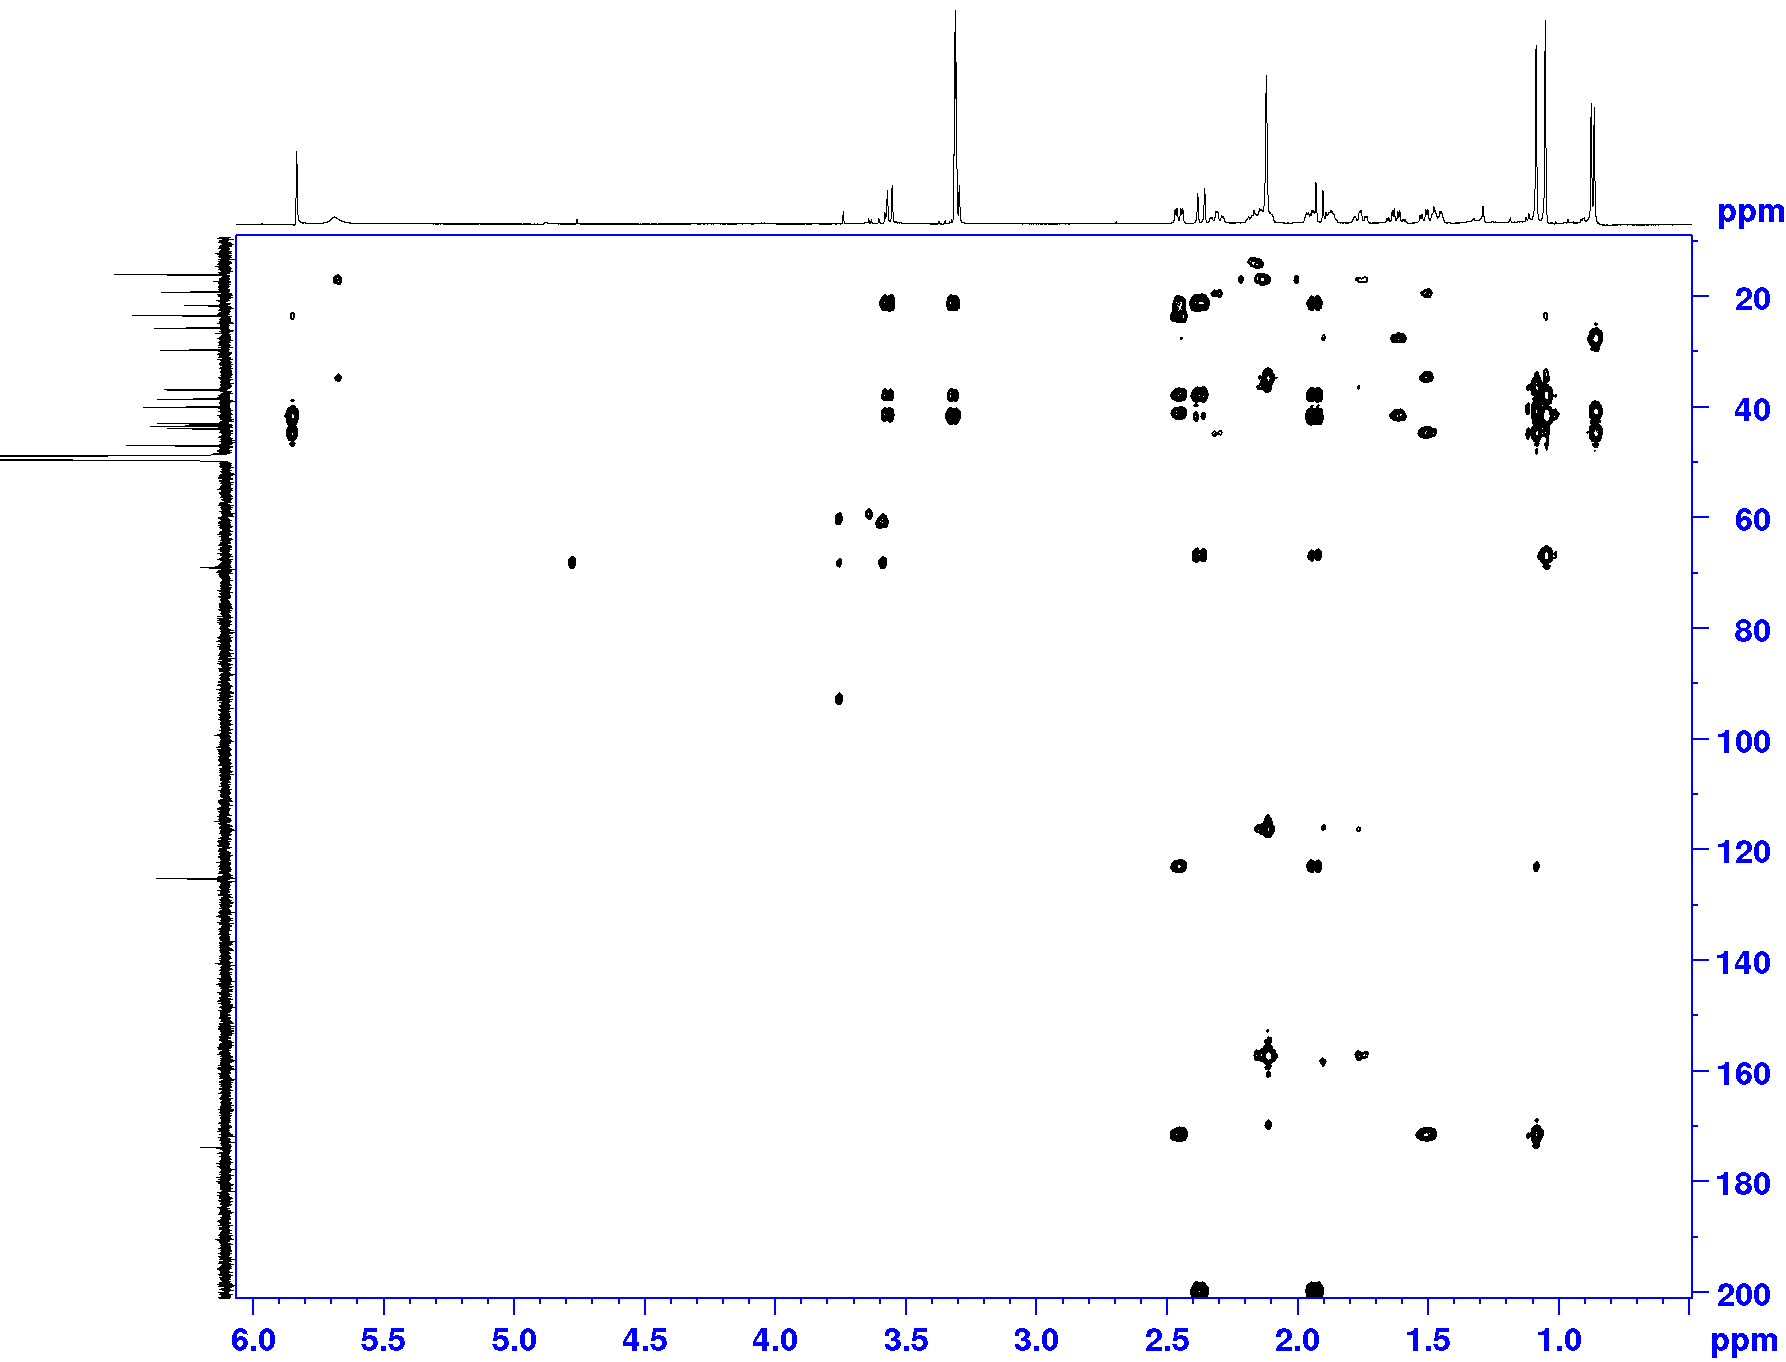


**S10.** HR-ESI-MS spectrum of Compound **4** (negative ion mode).


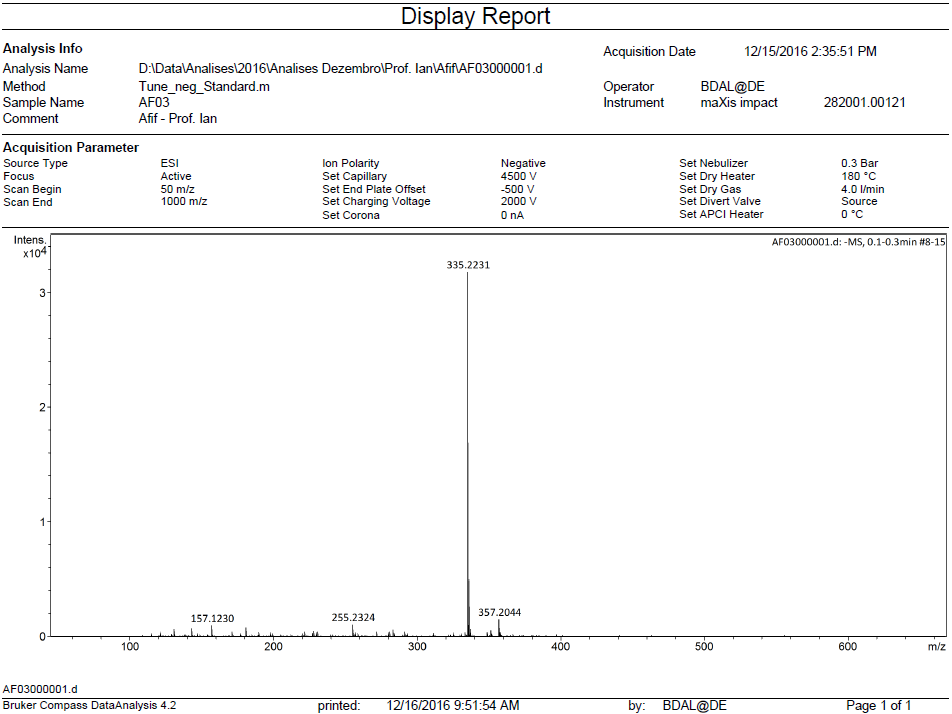


**S11.** 1H NMR (600.13 MHz, CDCl3) spectrum of Compound **4**.

**
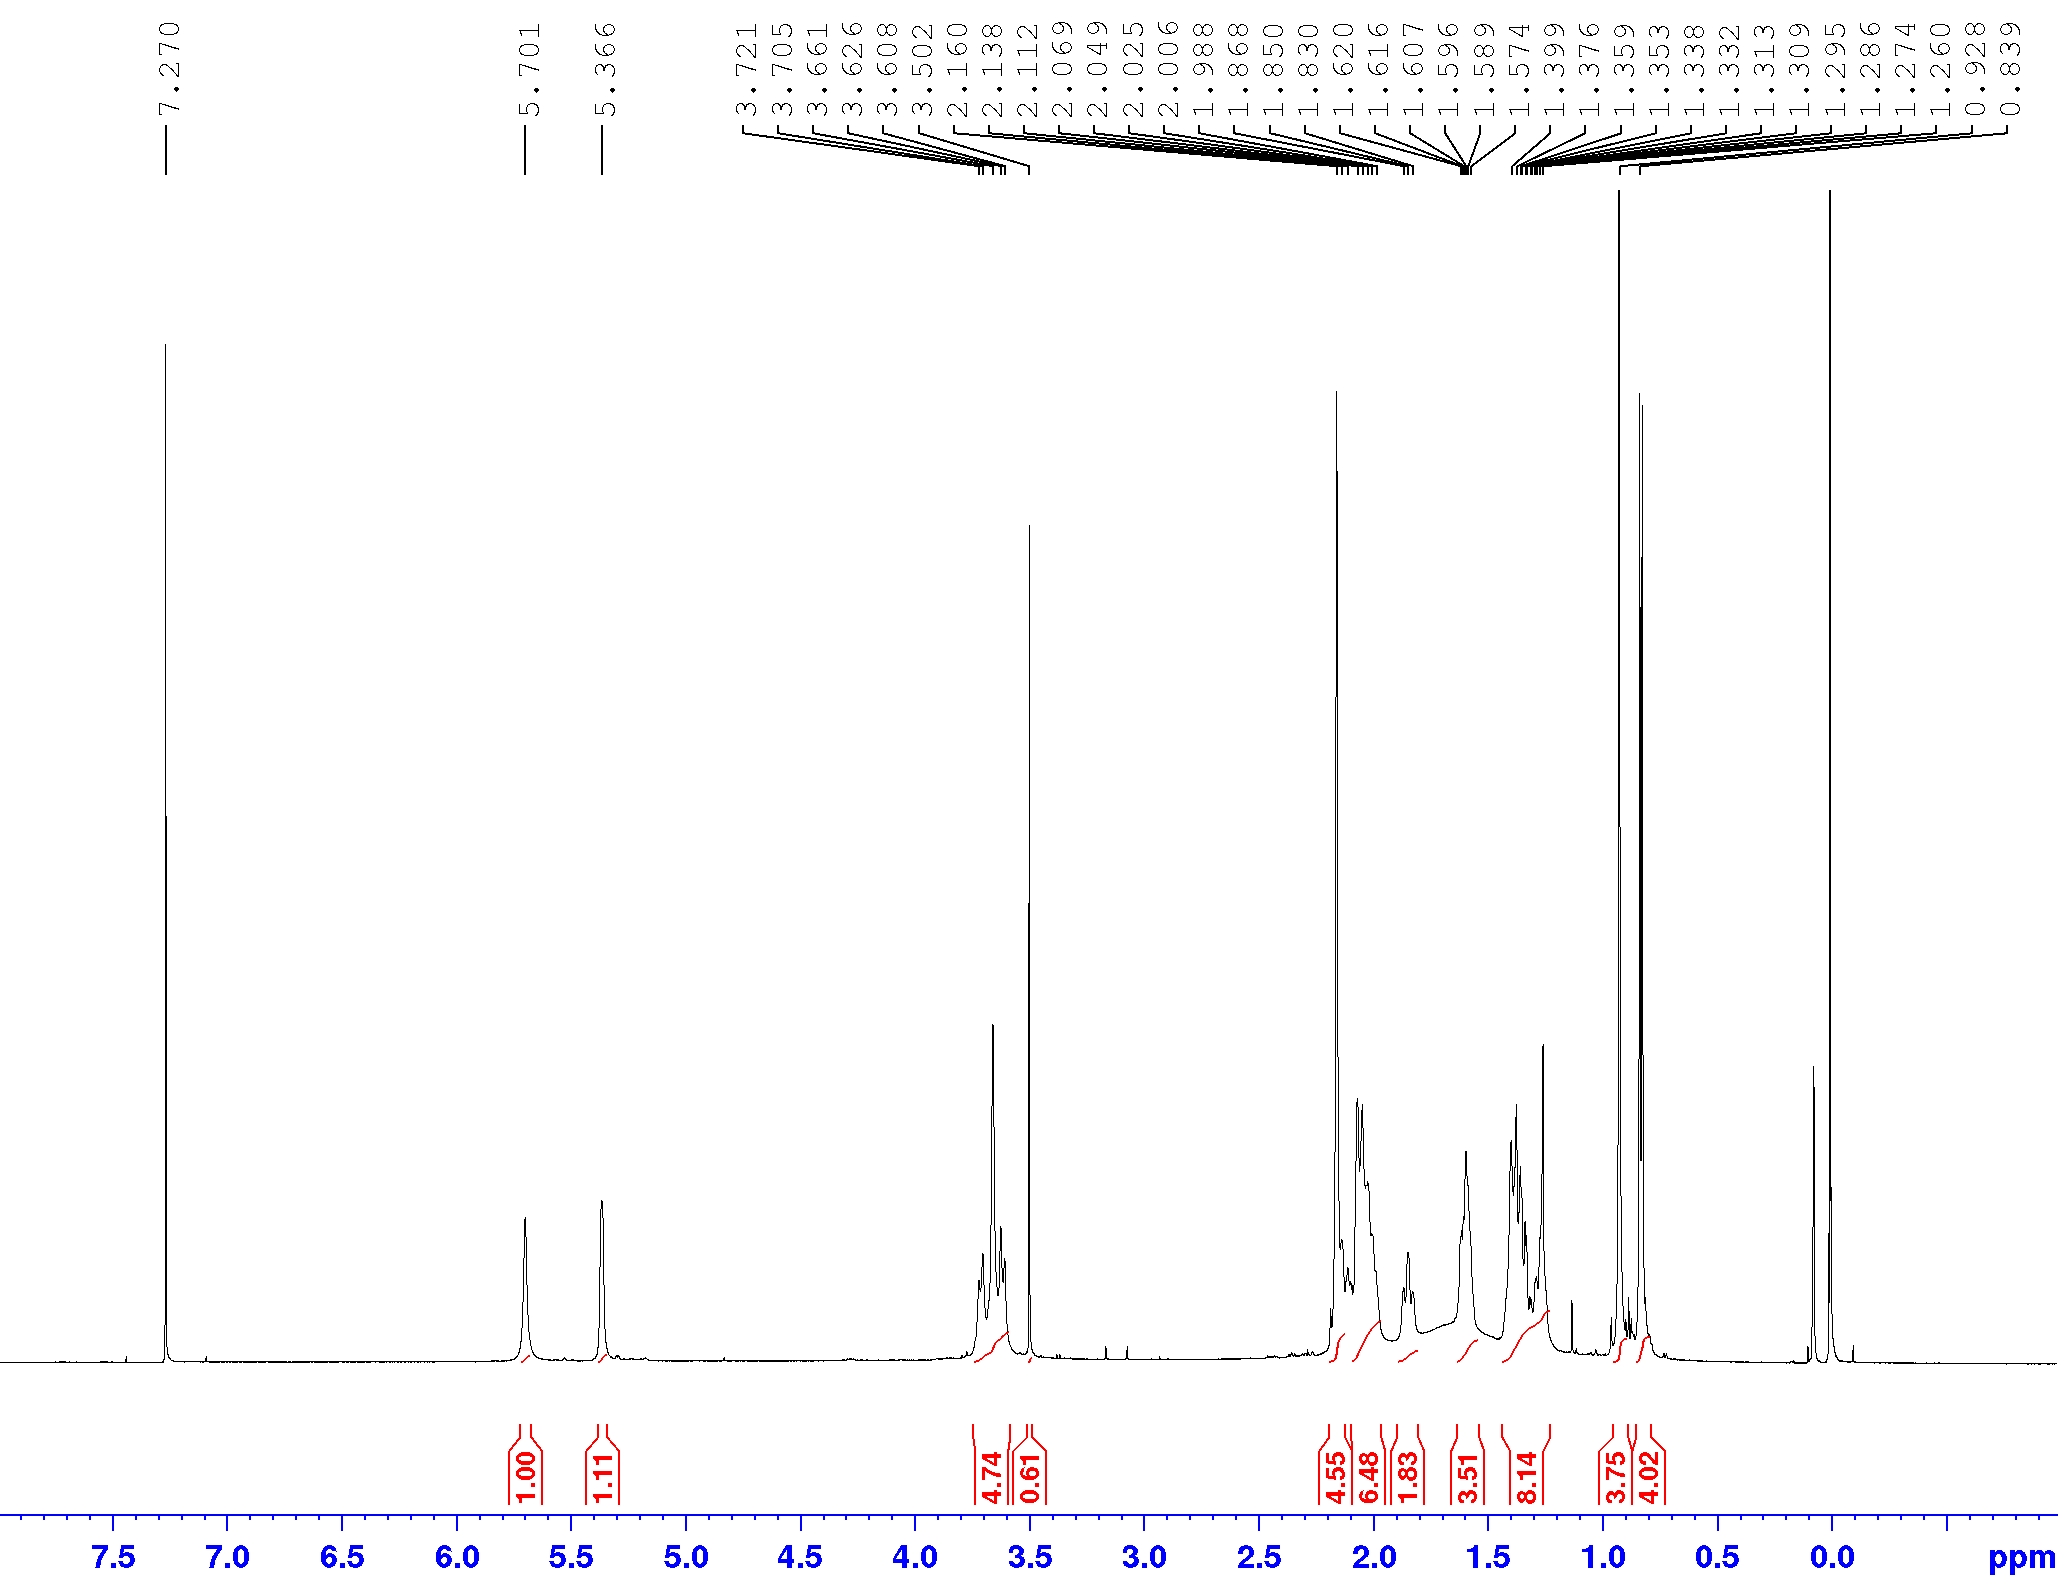
**

**S12.** 13C NMR (150.9 MHz, CDCl3) spectrum of Compound **4**.


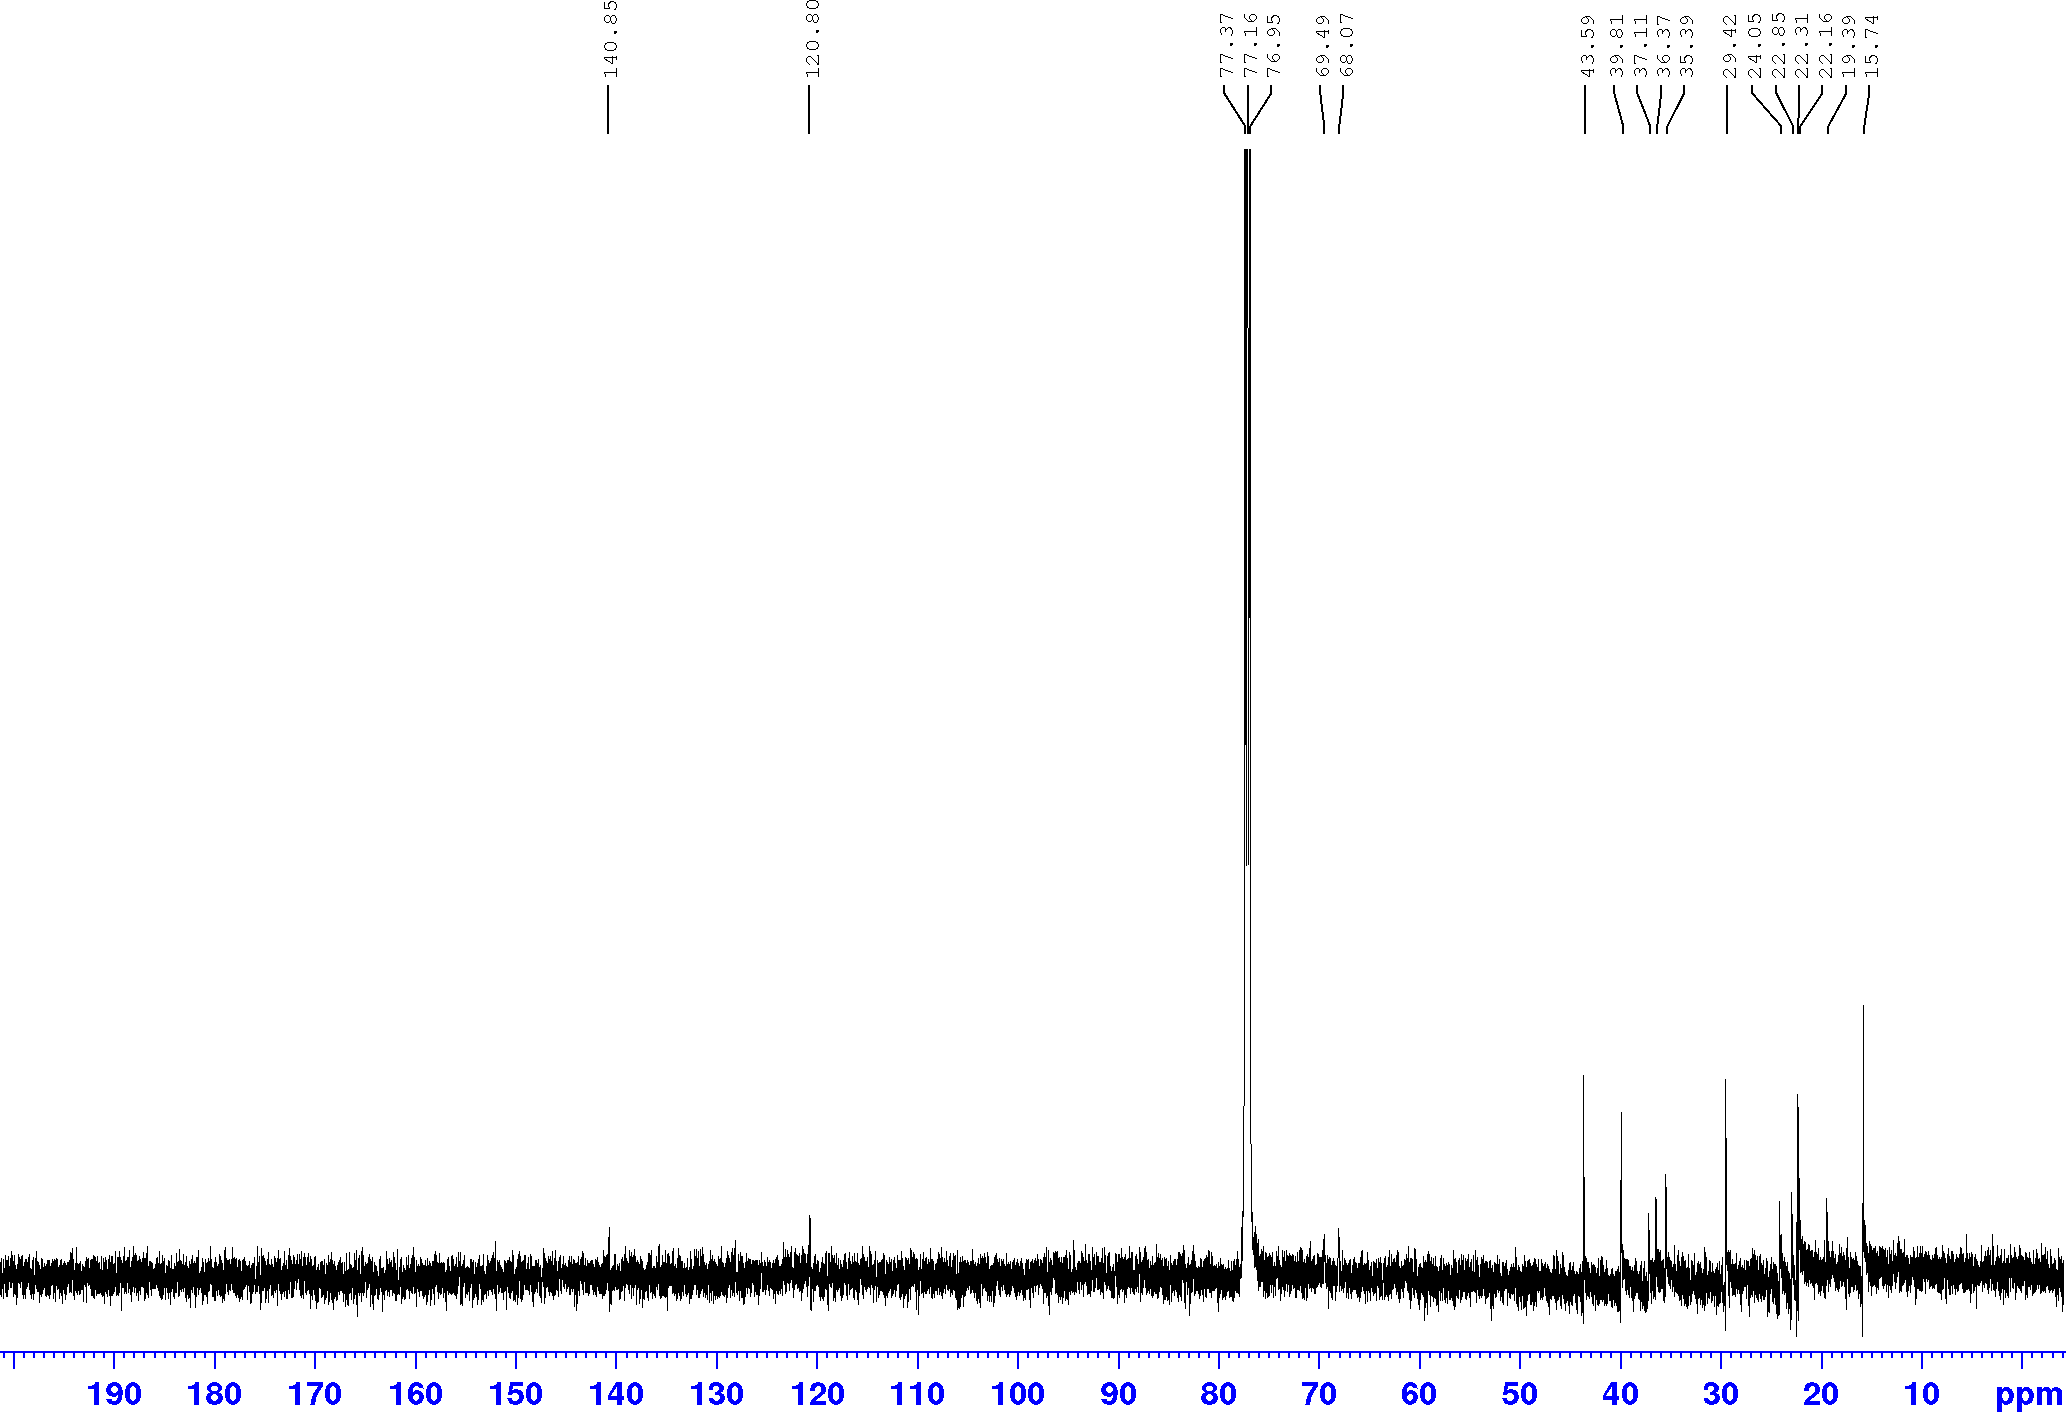


**S13.** HSQC (600.13 MHz, CDCl3) spectrum of Compound **4**.


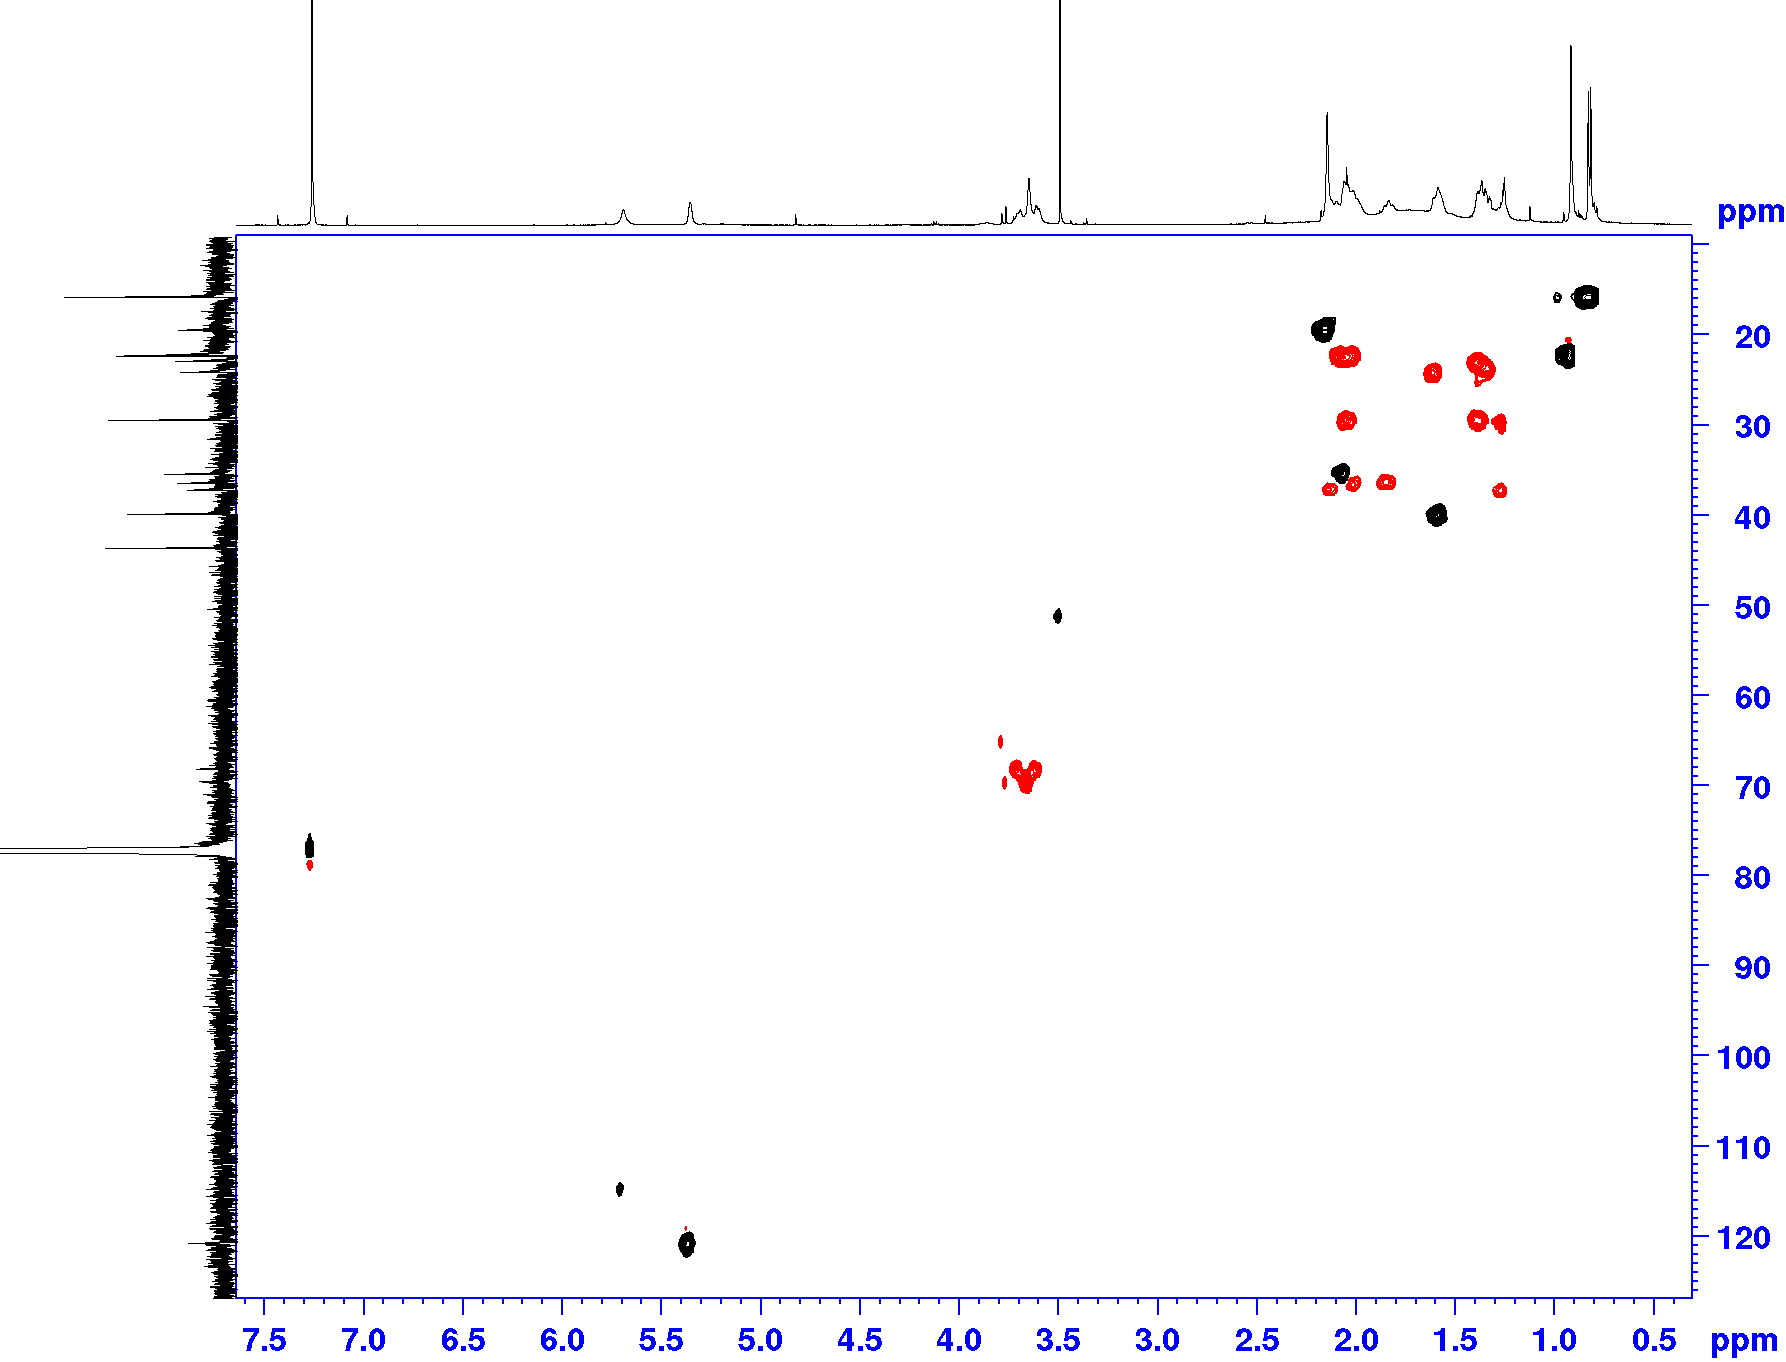


**S14.** HMBC (600.13 MHz, CDCl3) spectrum of Compound **4**.


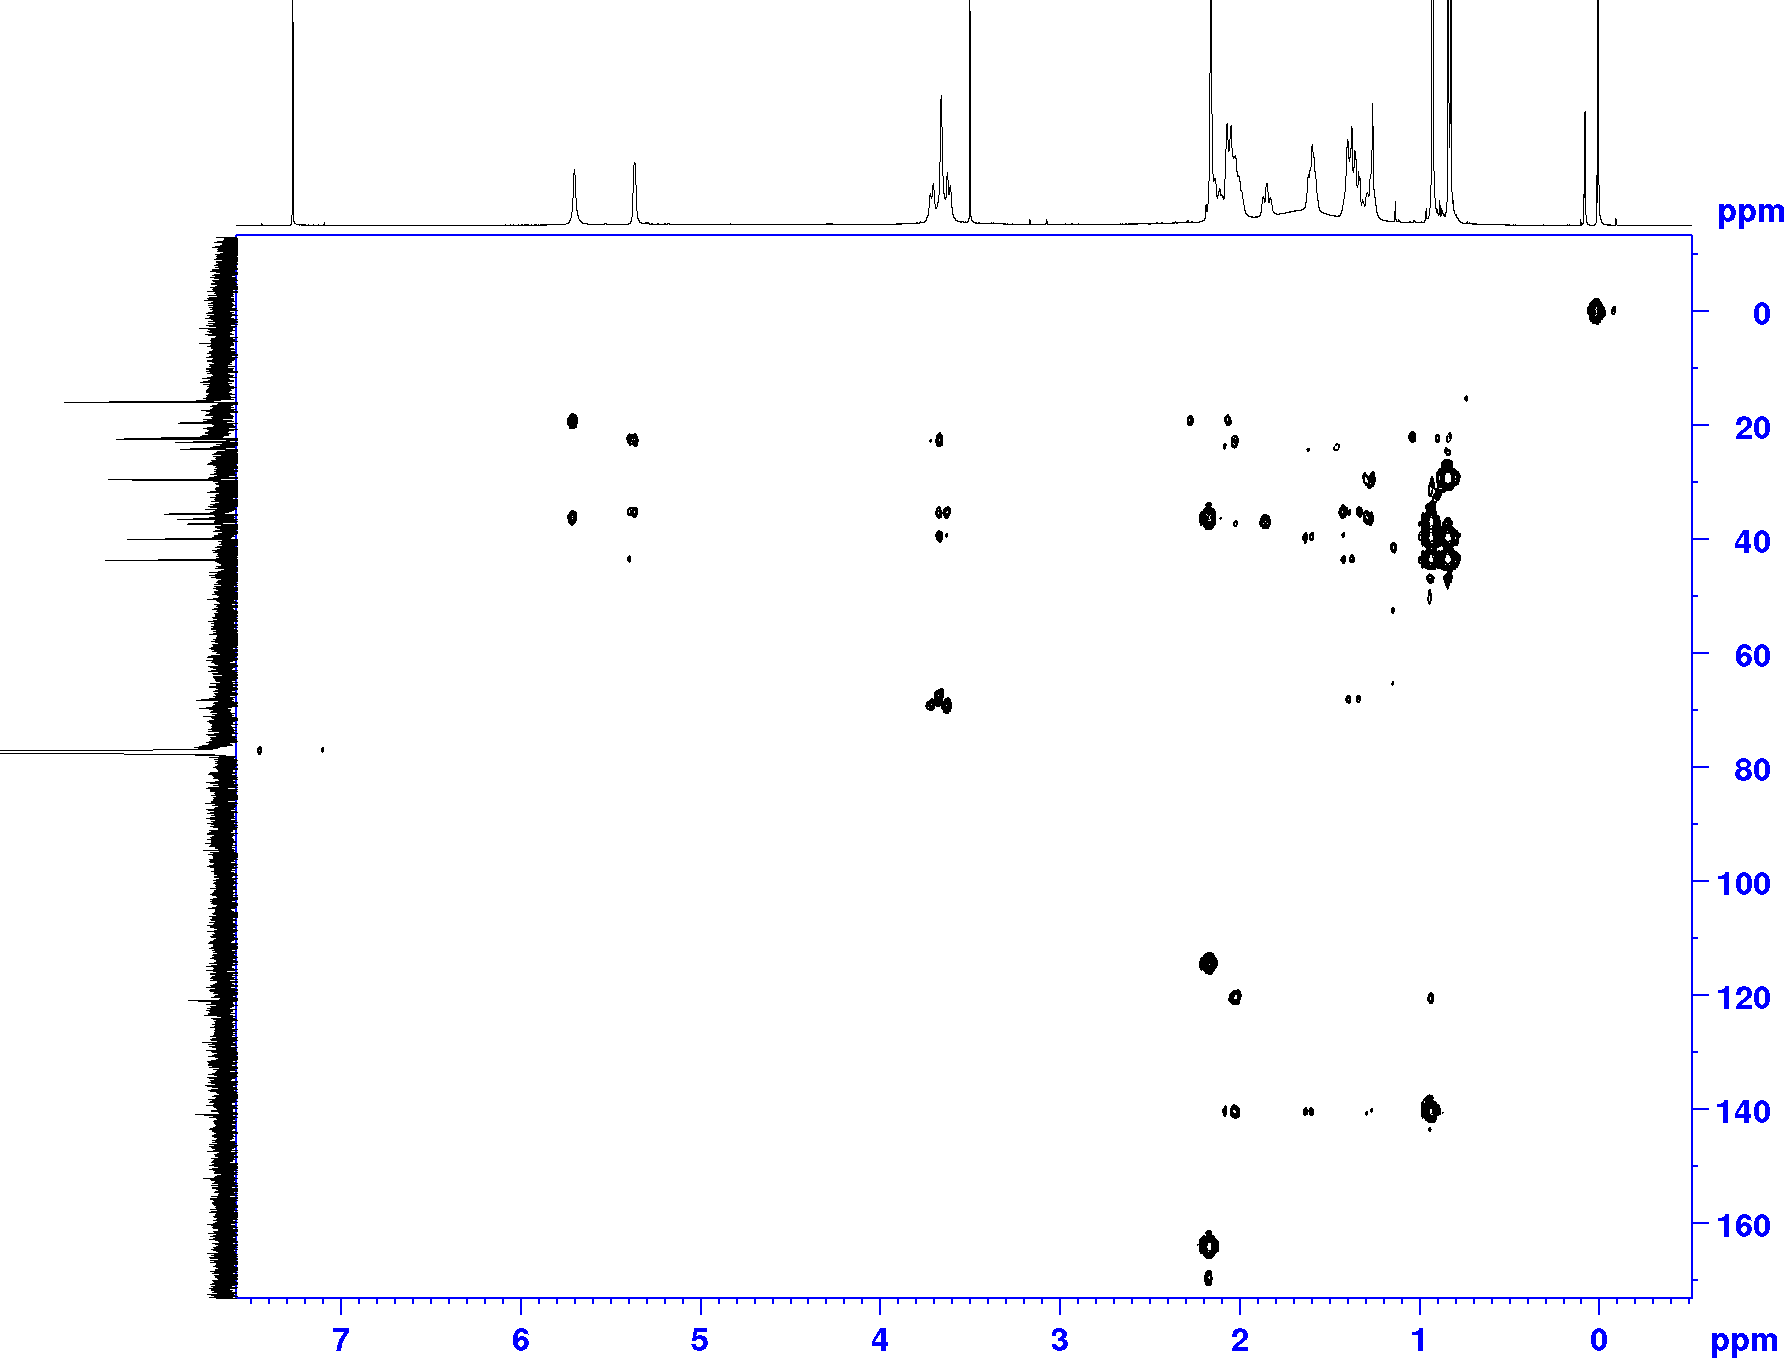


**S15.** HR-ESI-MS spectrum of Compound **5** (negative ion mode).


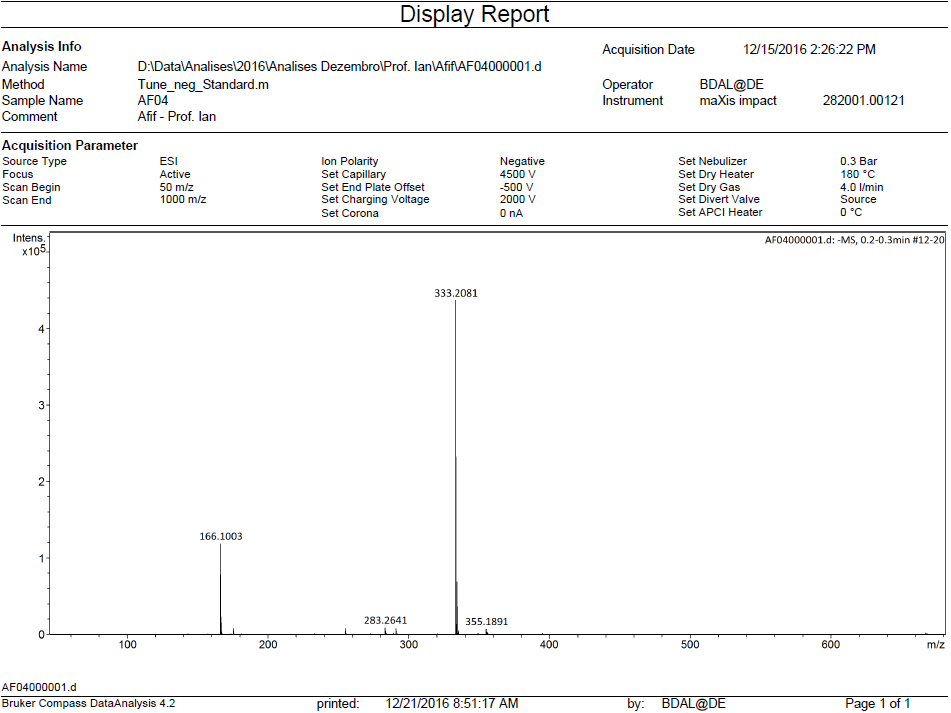


**S16.** 1H NMR (600.13 MHz, CDCl3) spectrum of Compound **5**.


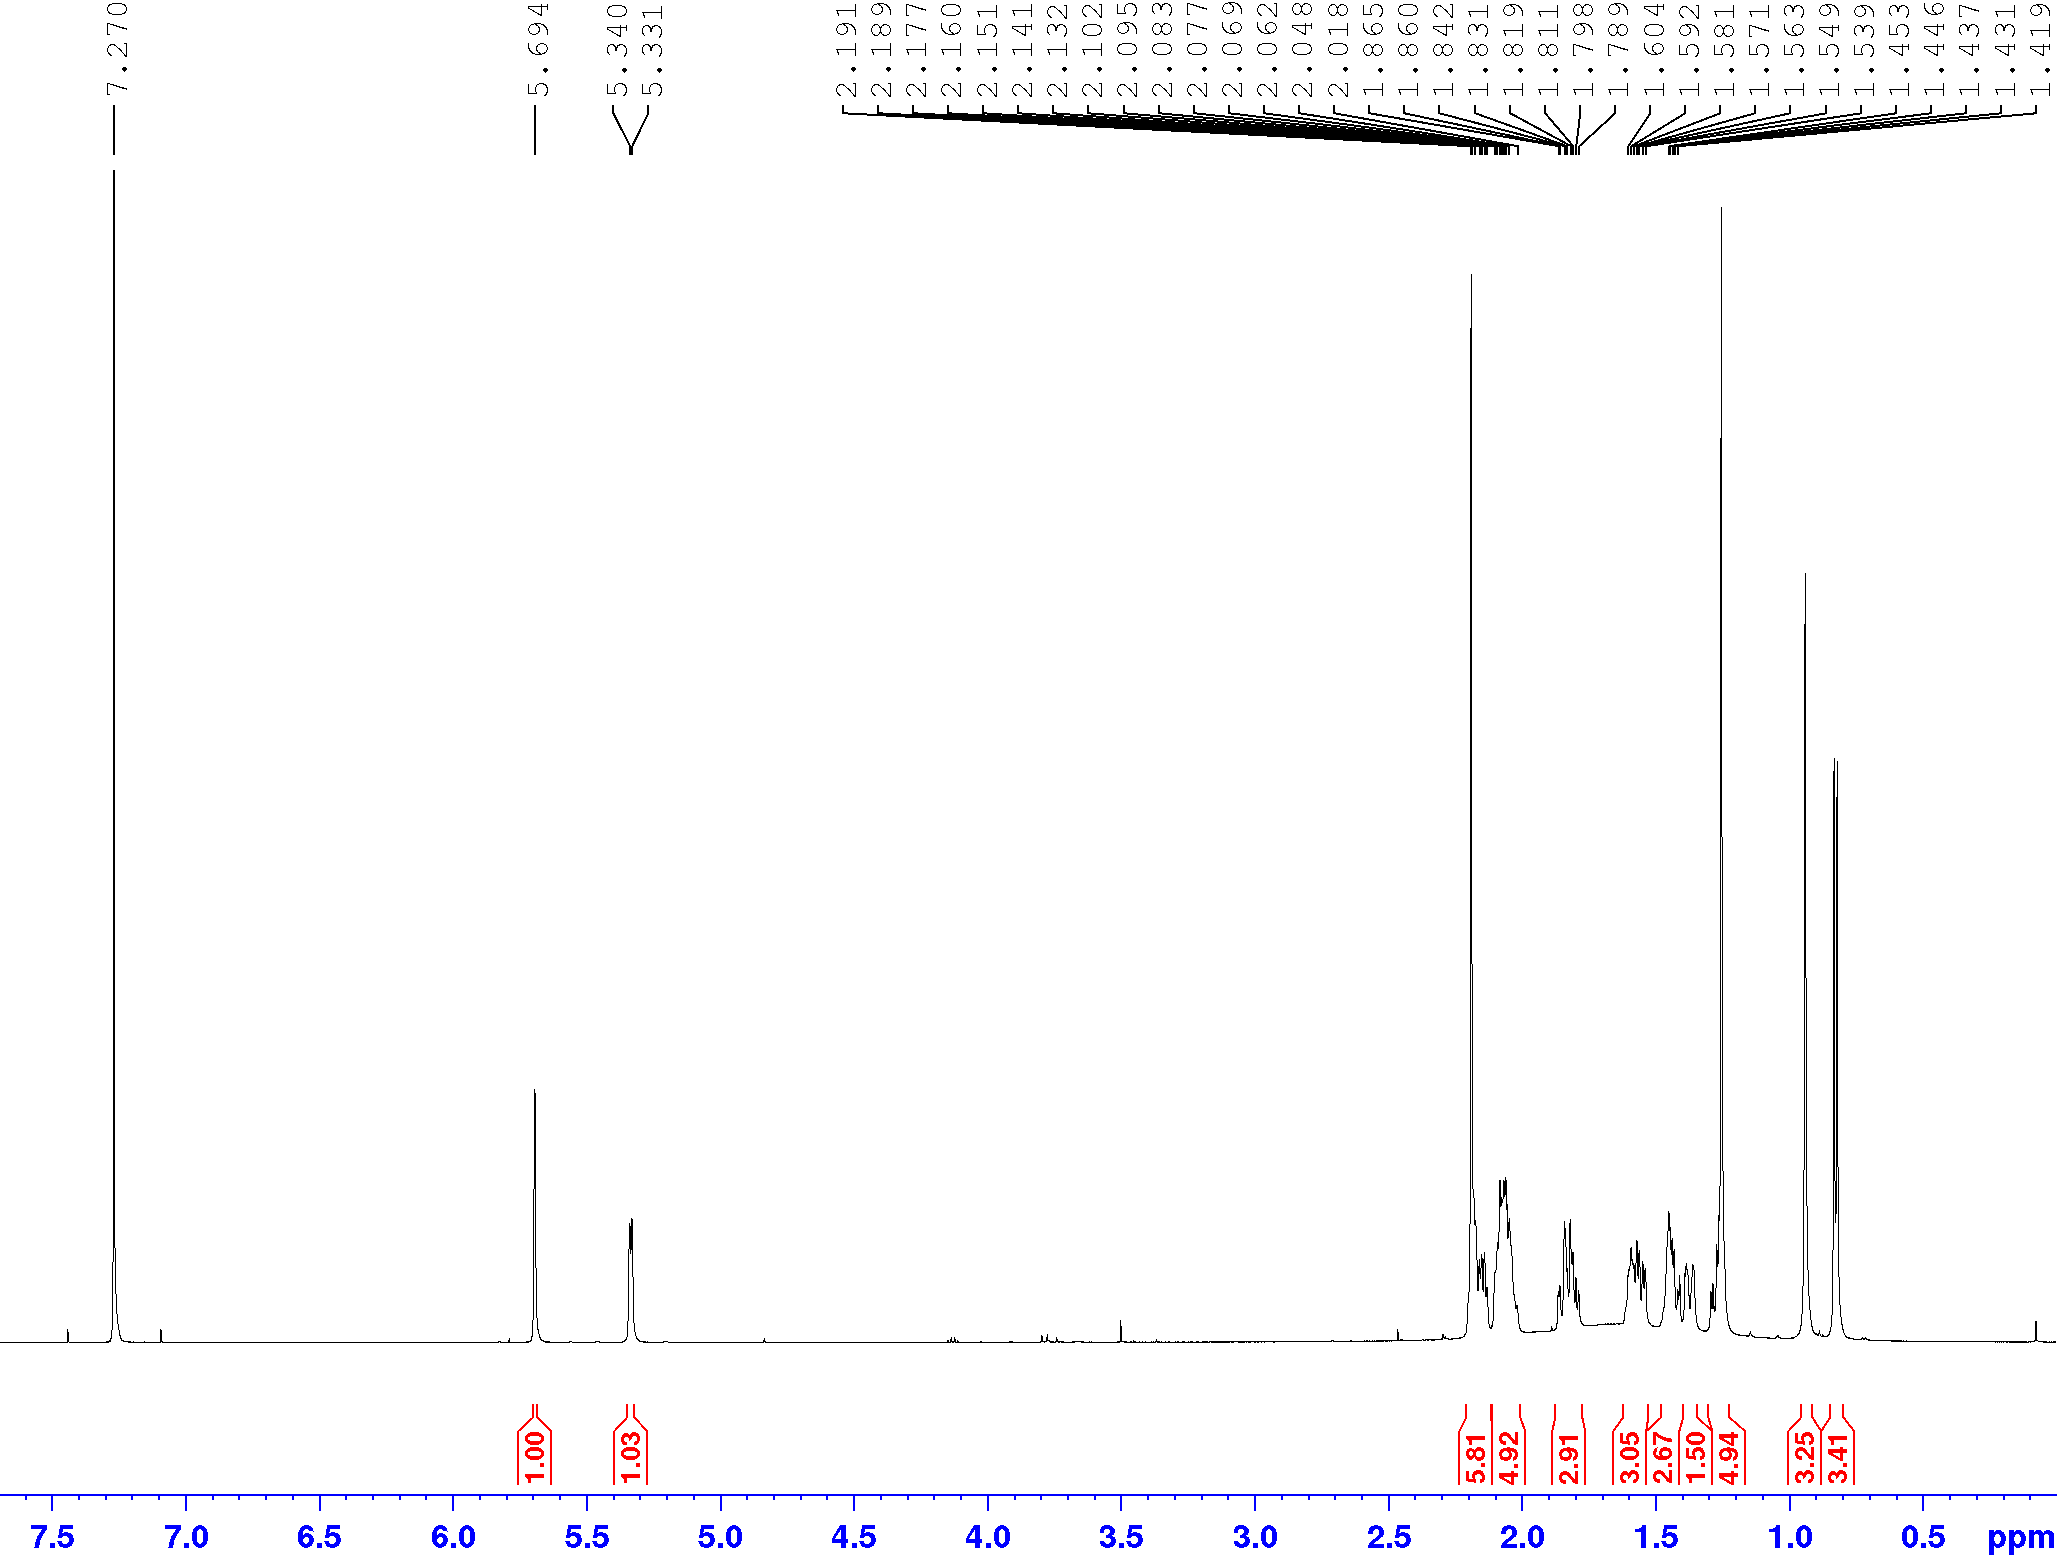


**S17.** 13C NMR (150.9 MHz, CDCl3) spectrum of Compound **5**.


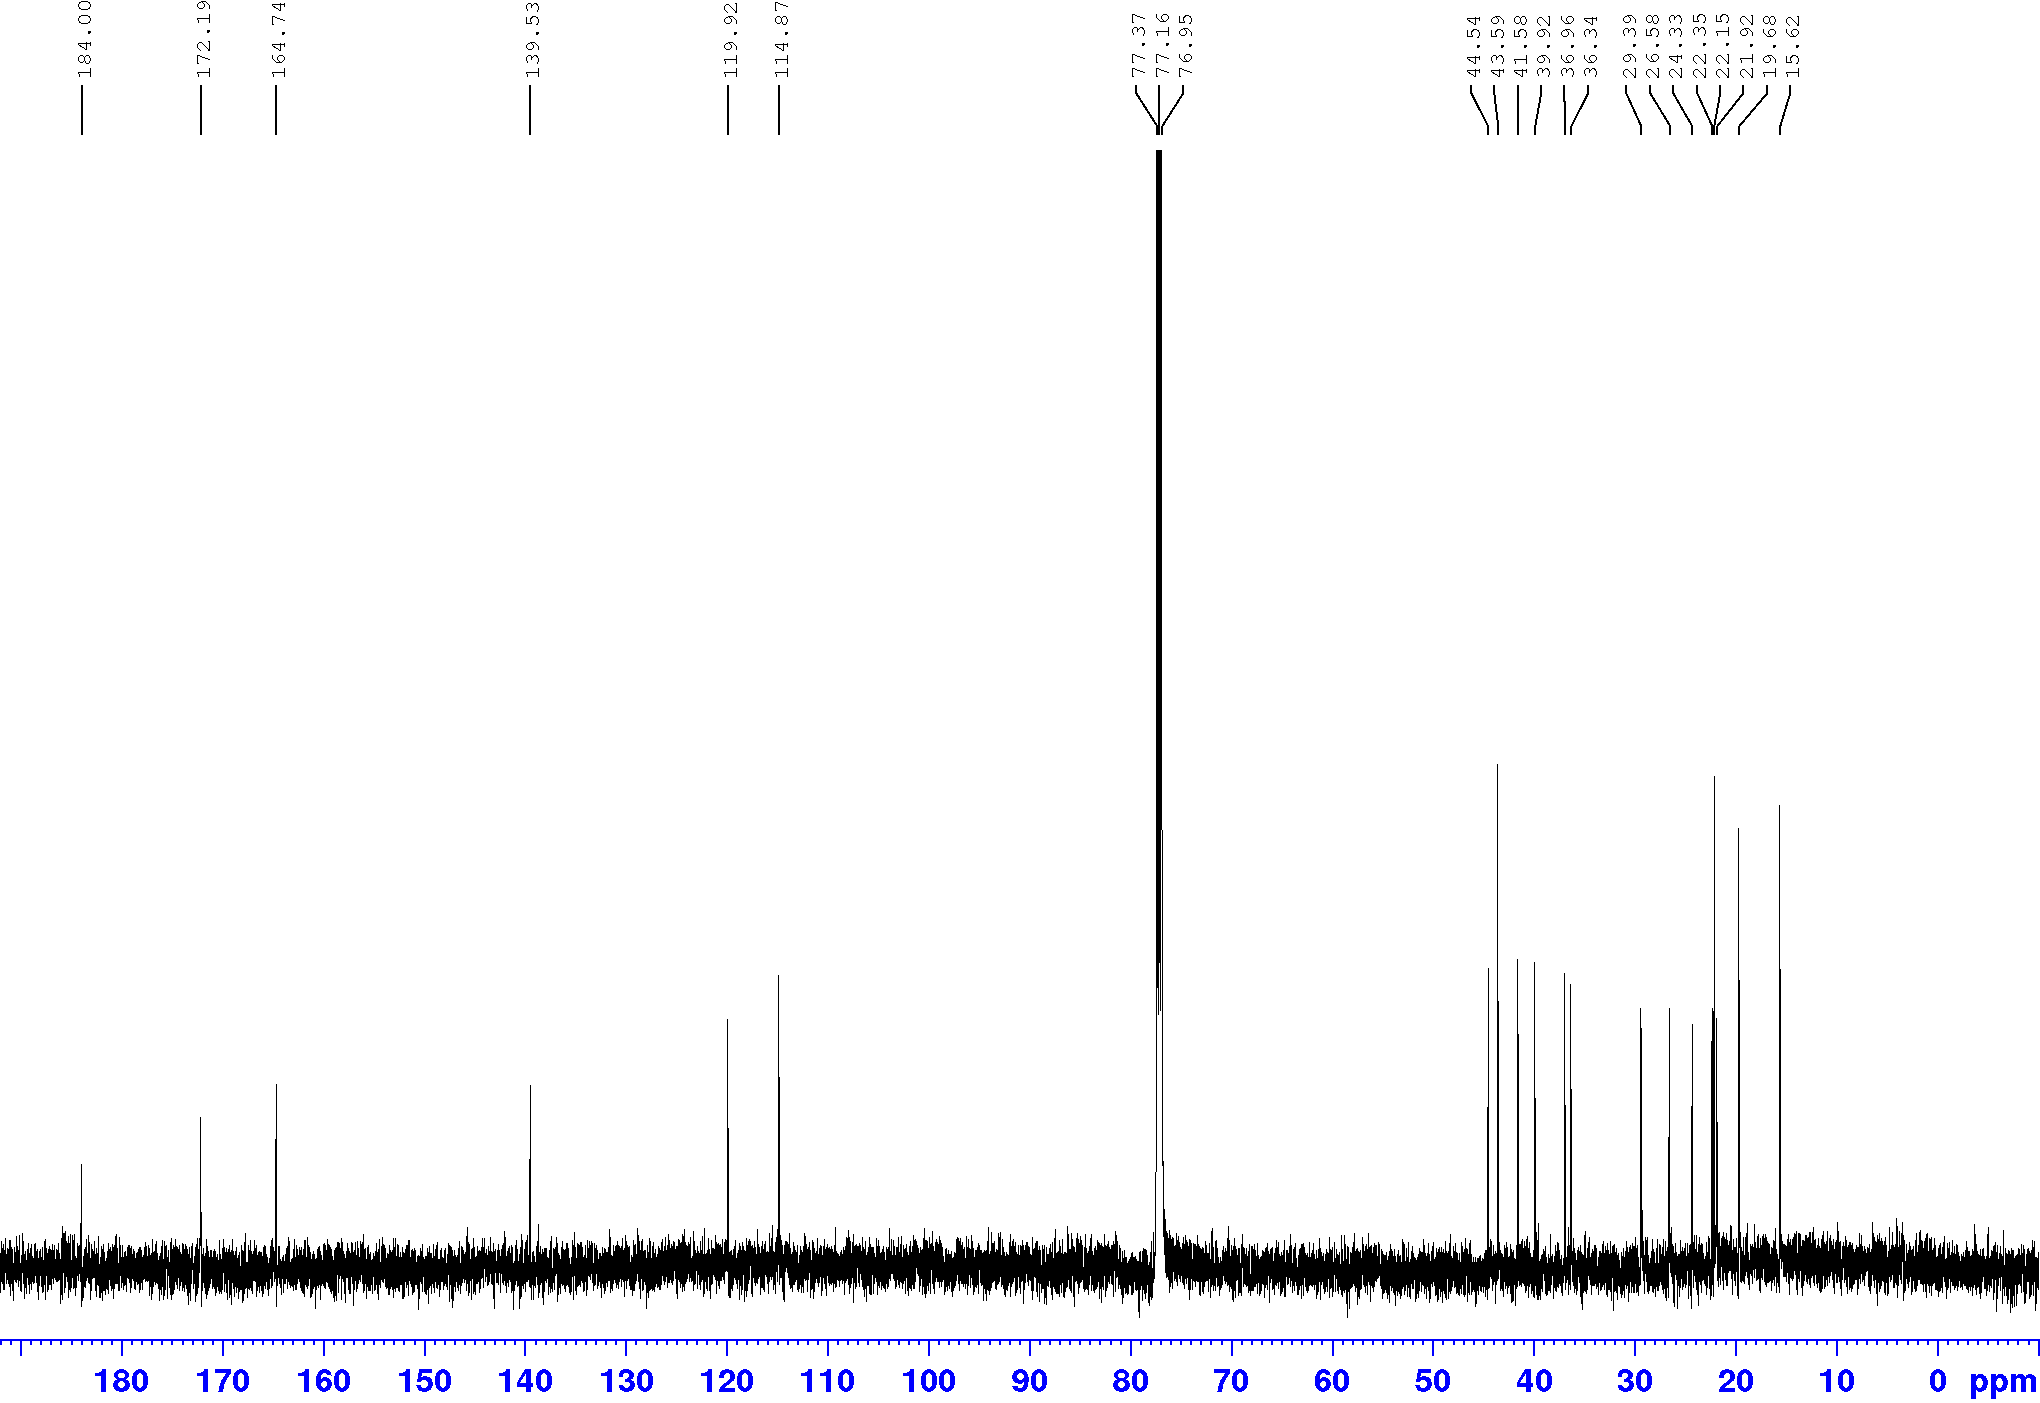


**S18.** HSQC (600.13 MHz, CDCl3) spectrum of Compound **5**.


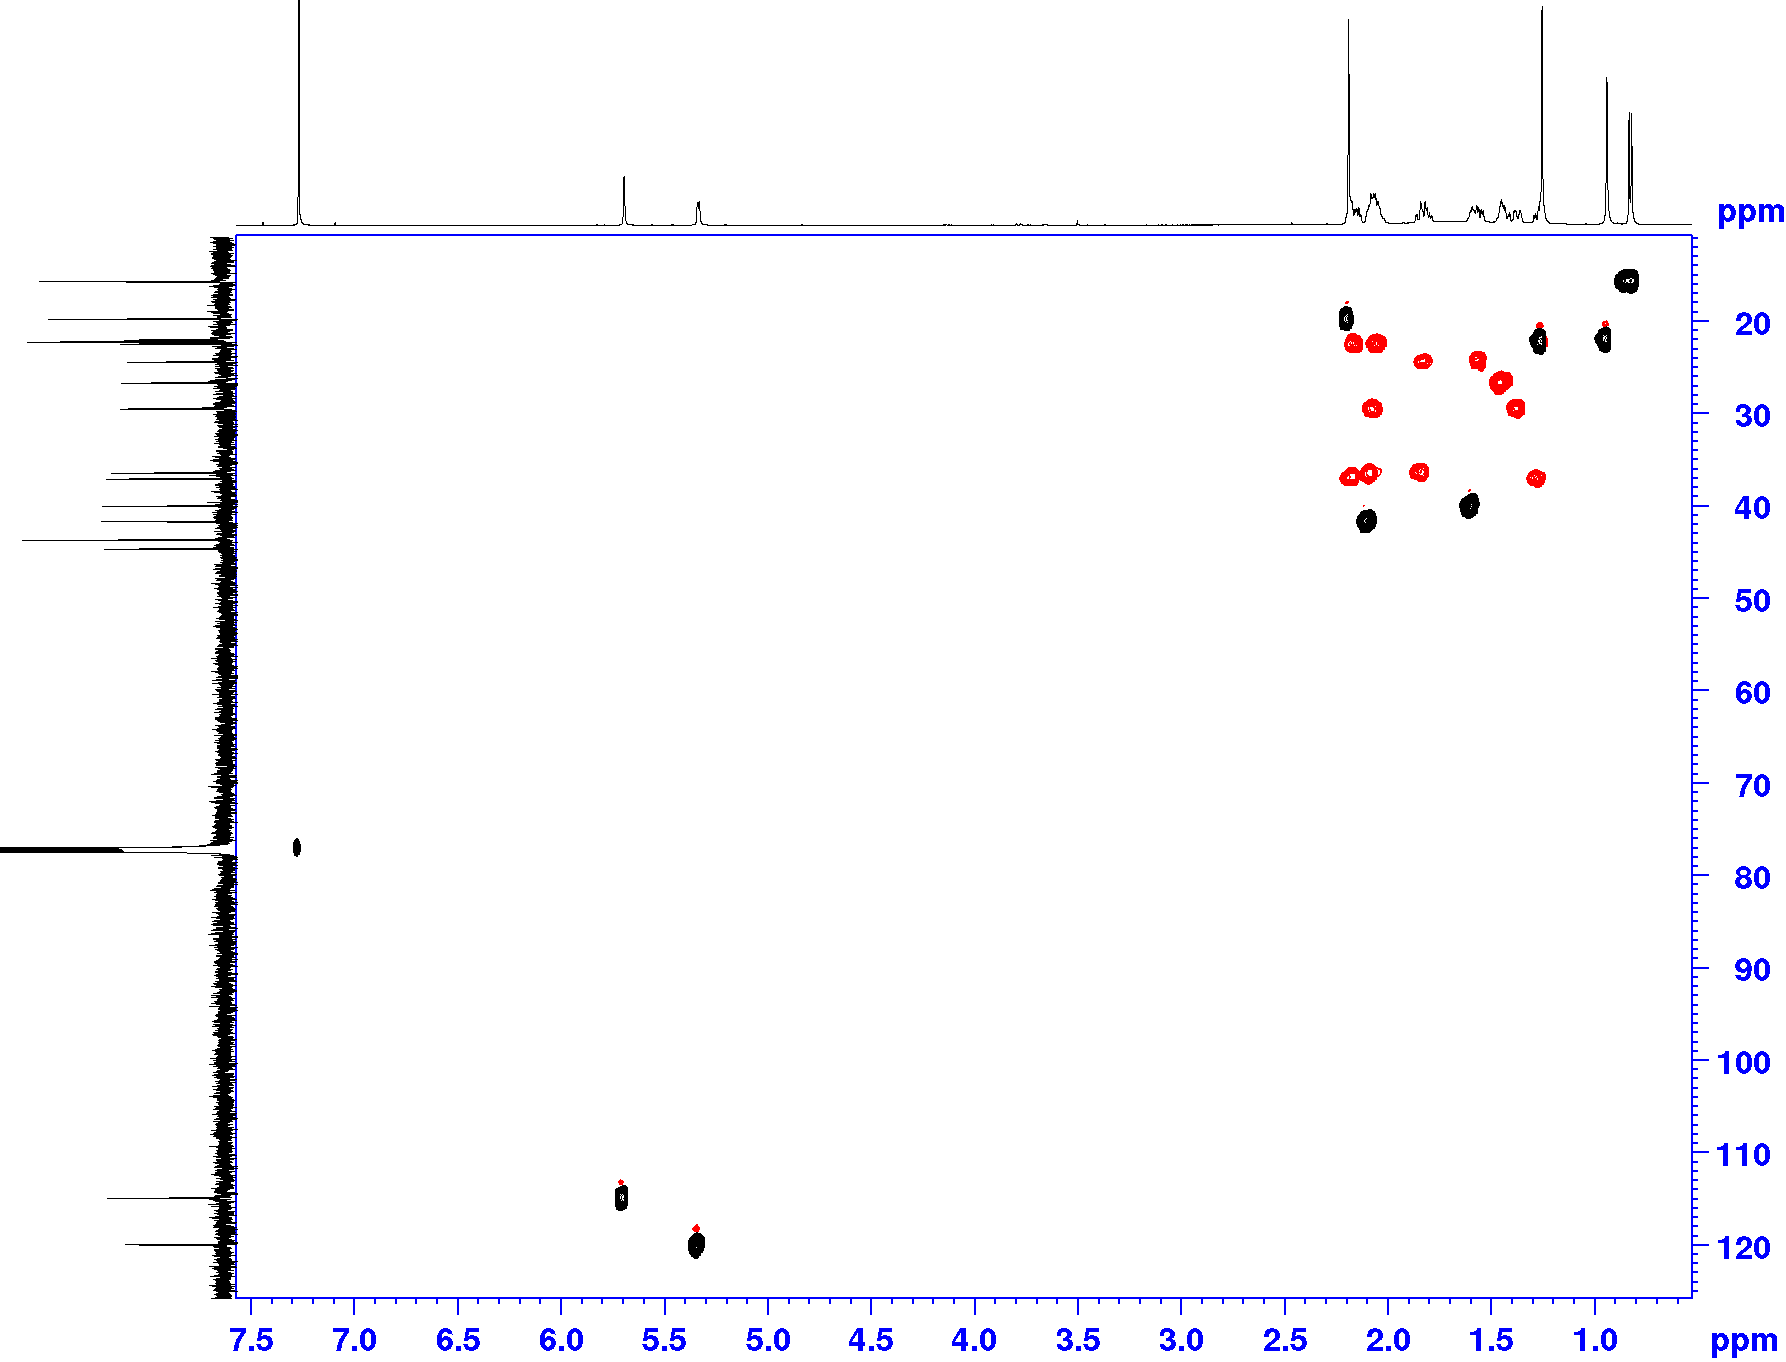


**S19.** HMBC (600.13 MHz, CDCl3) spectrum of Compound **5**.


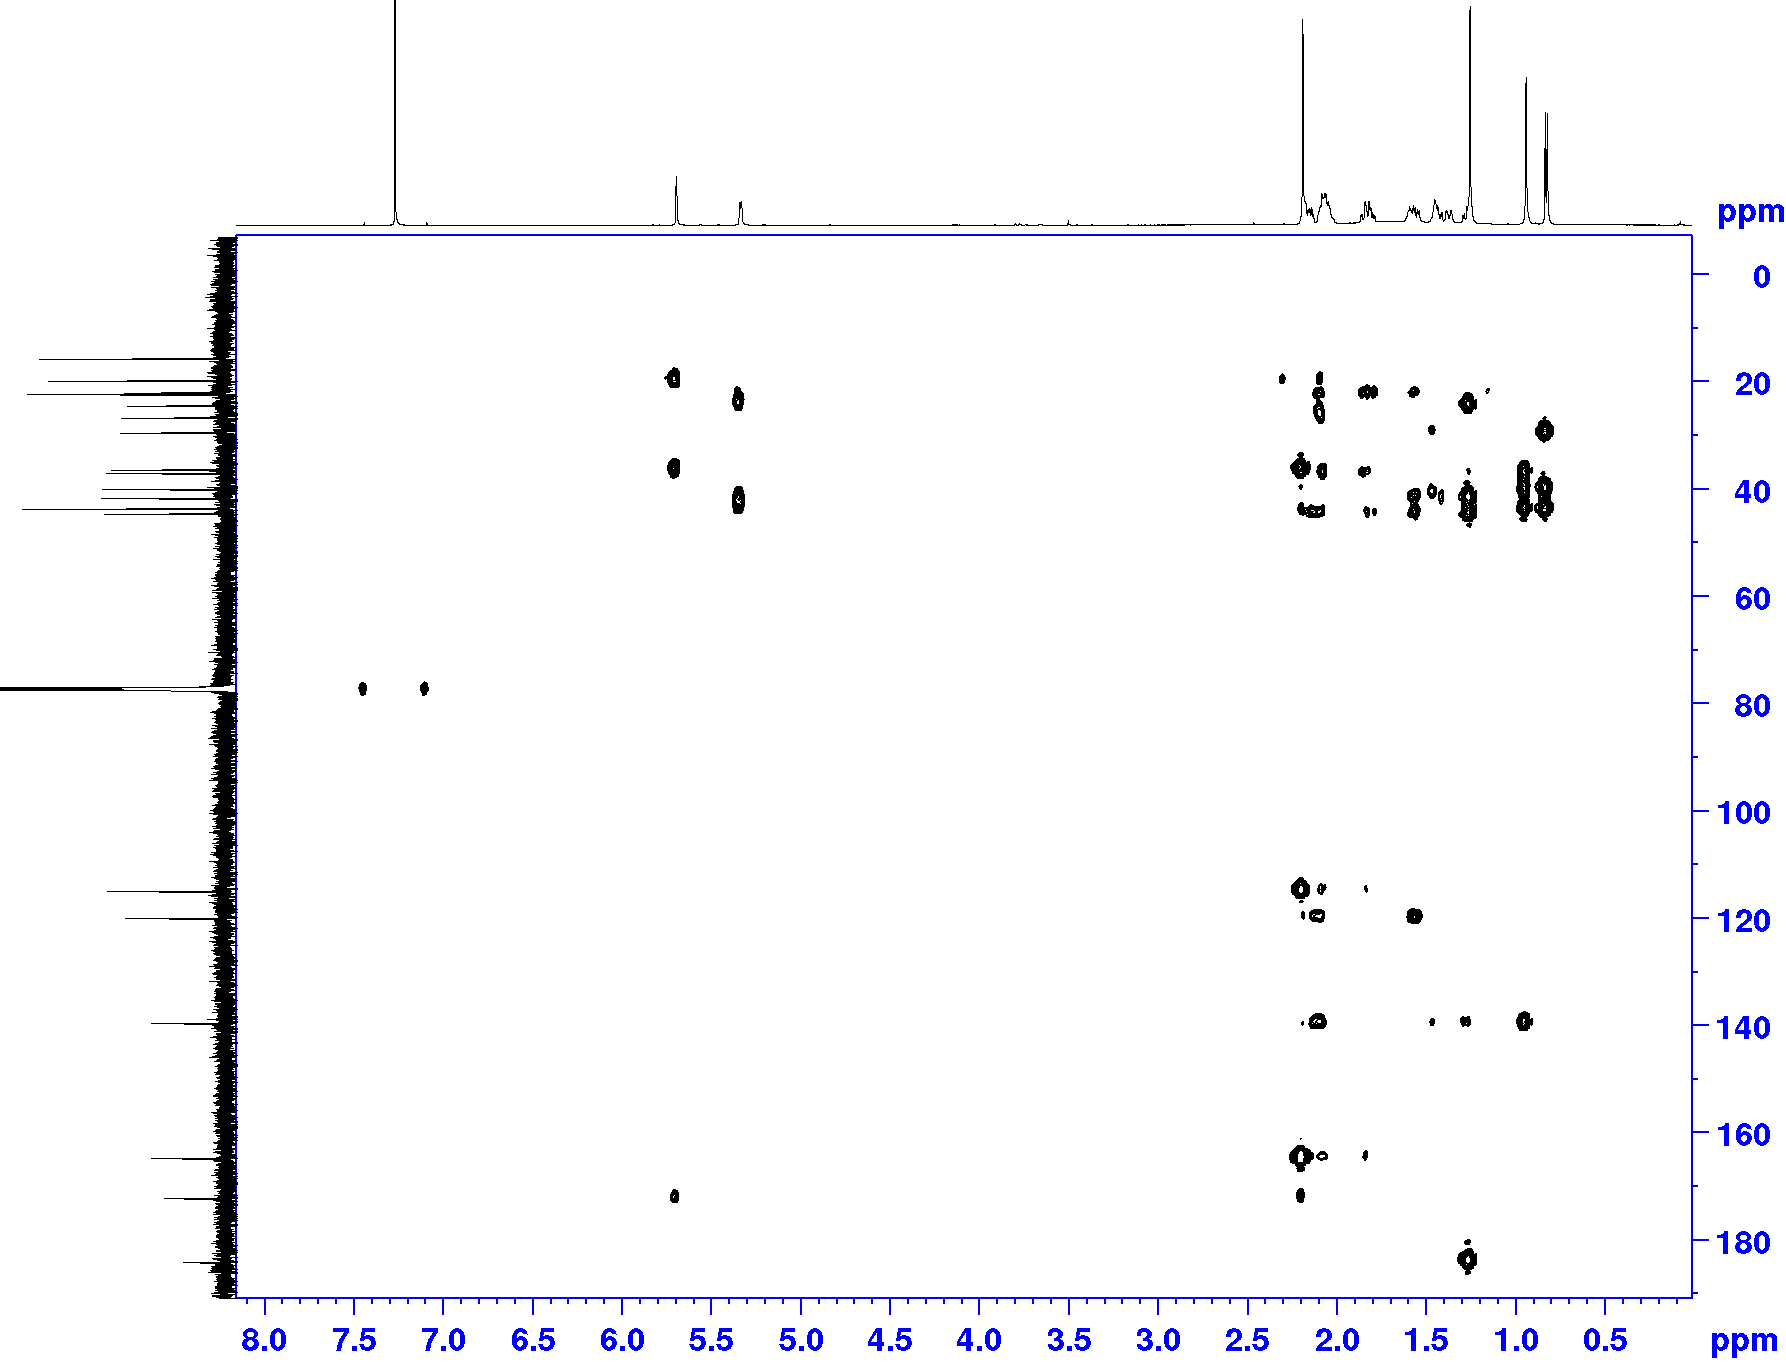


**S20.** HR-ESI-MS spectrum of Compound **6** (negative ion mode).


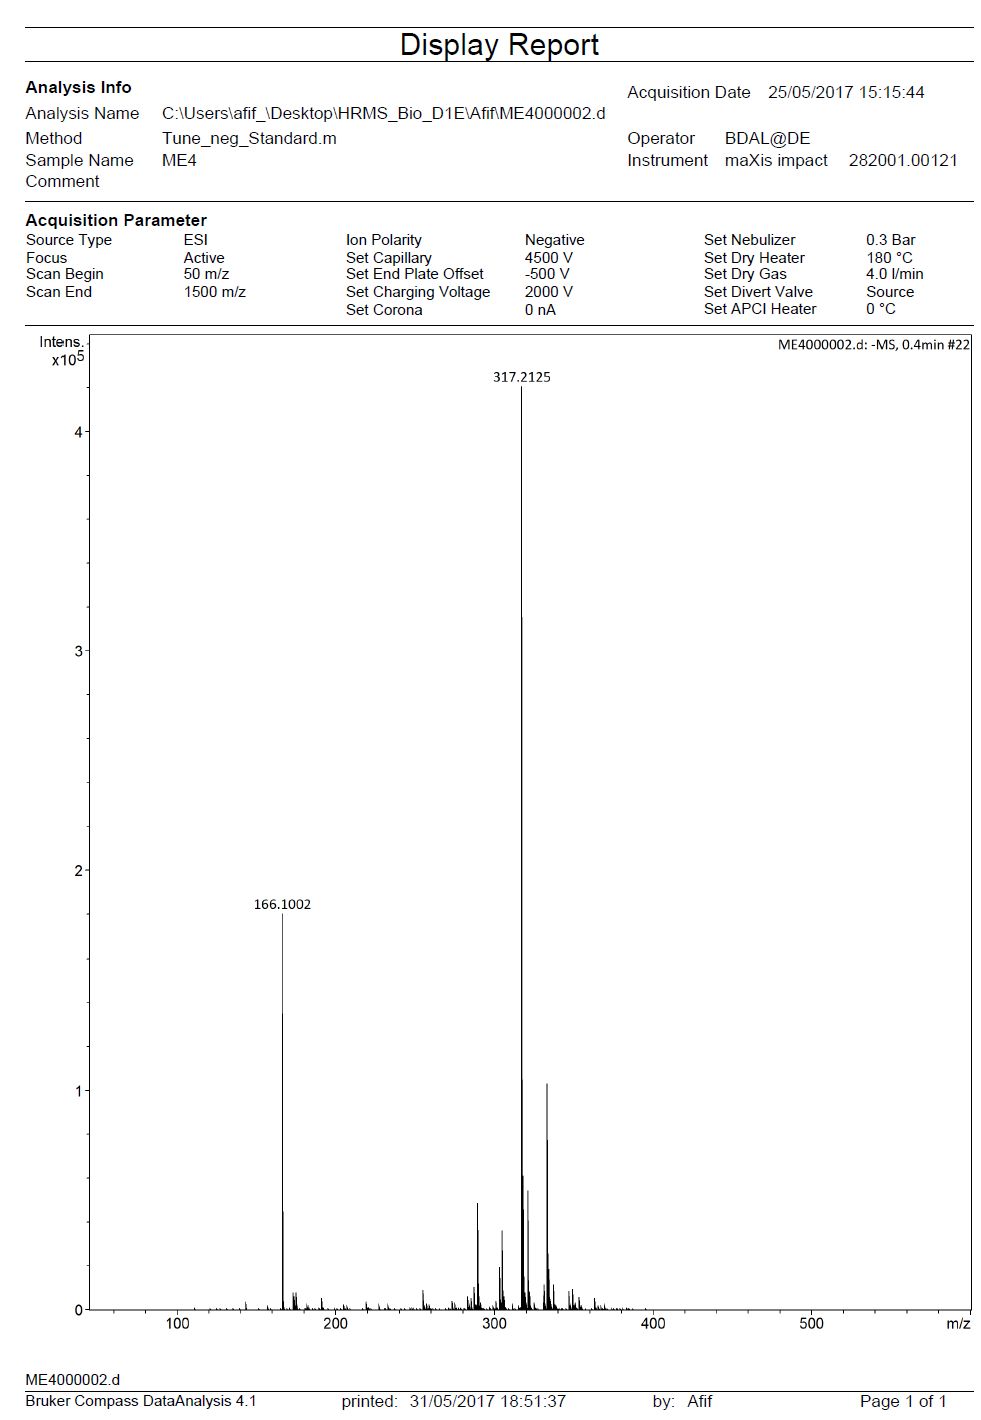


**S21.** 1H NMR (600.13 MHz, CDCl3) spectrum of Compound **6**.


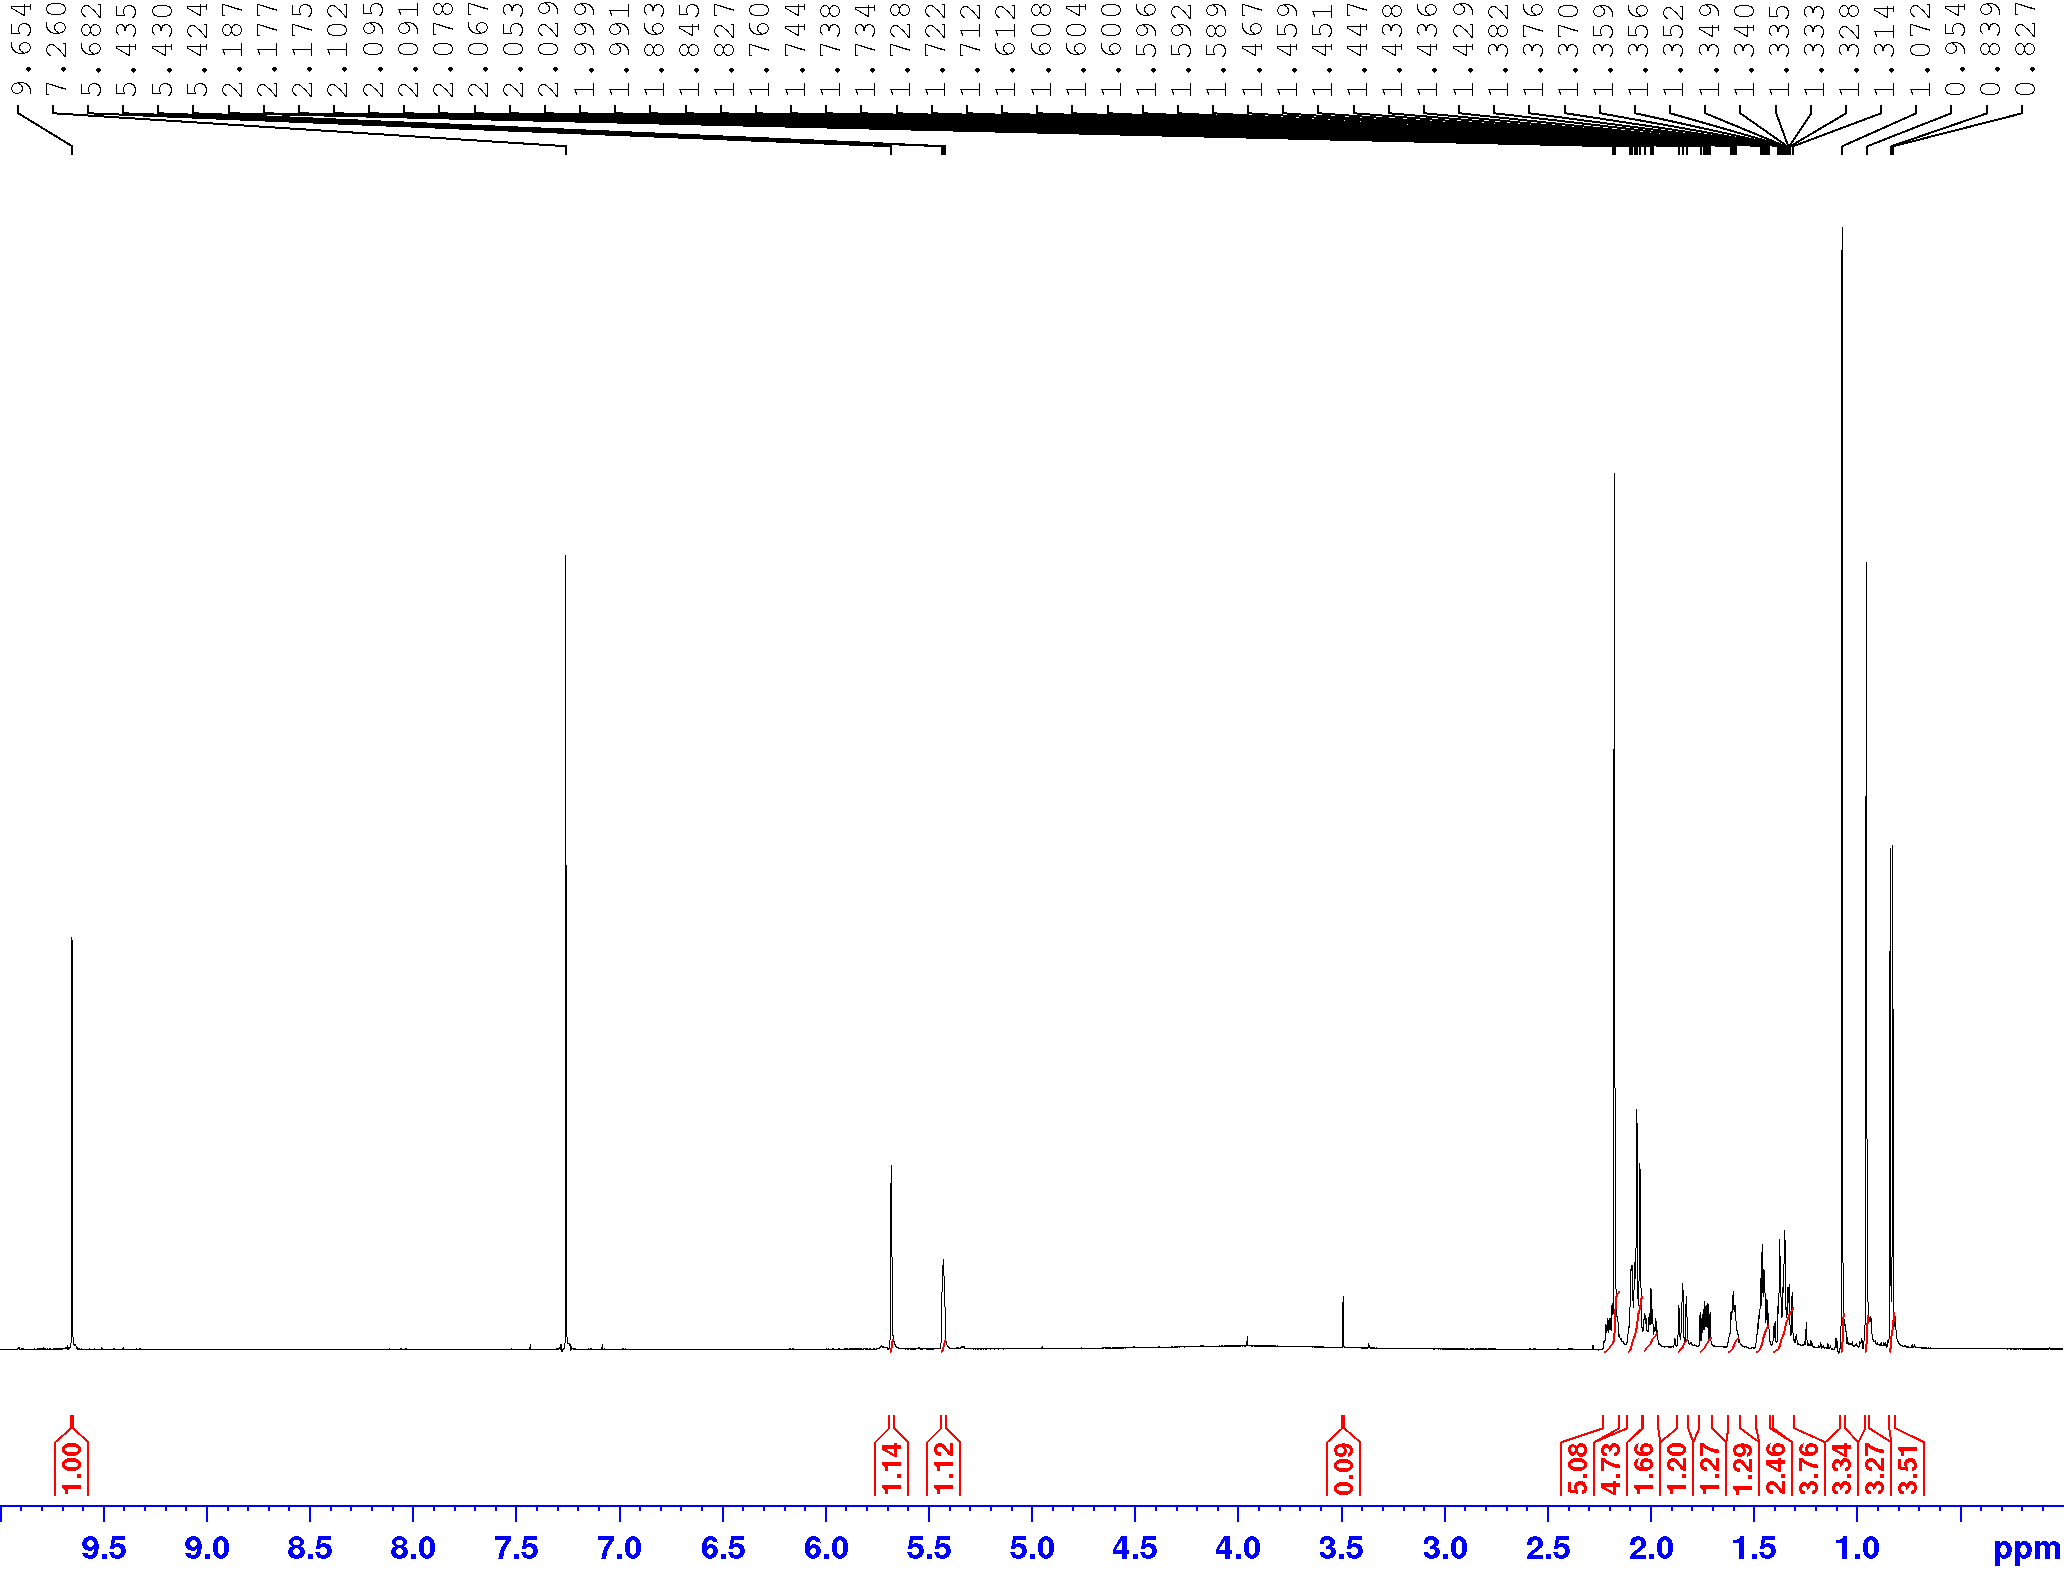


**S22.** 13C NMR (150.9 MHz, CDCl3) spectrum of Compound **6**.


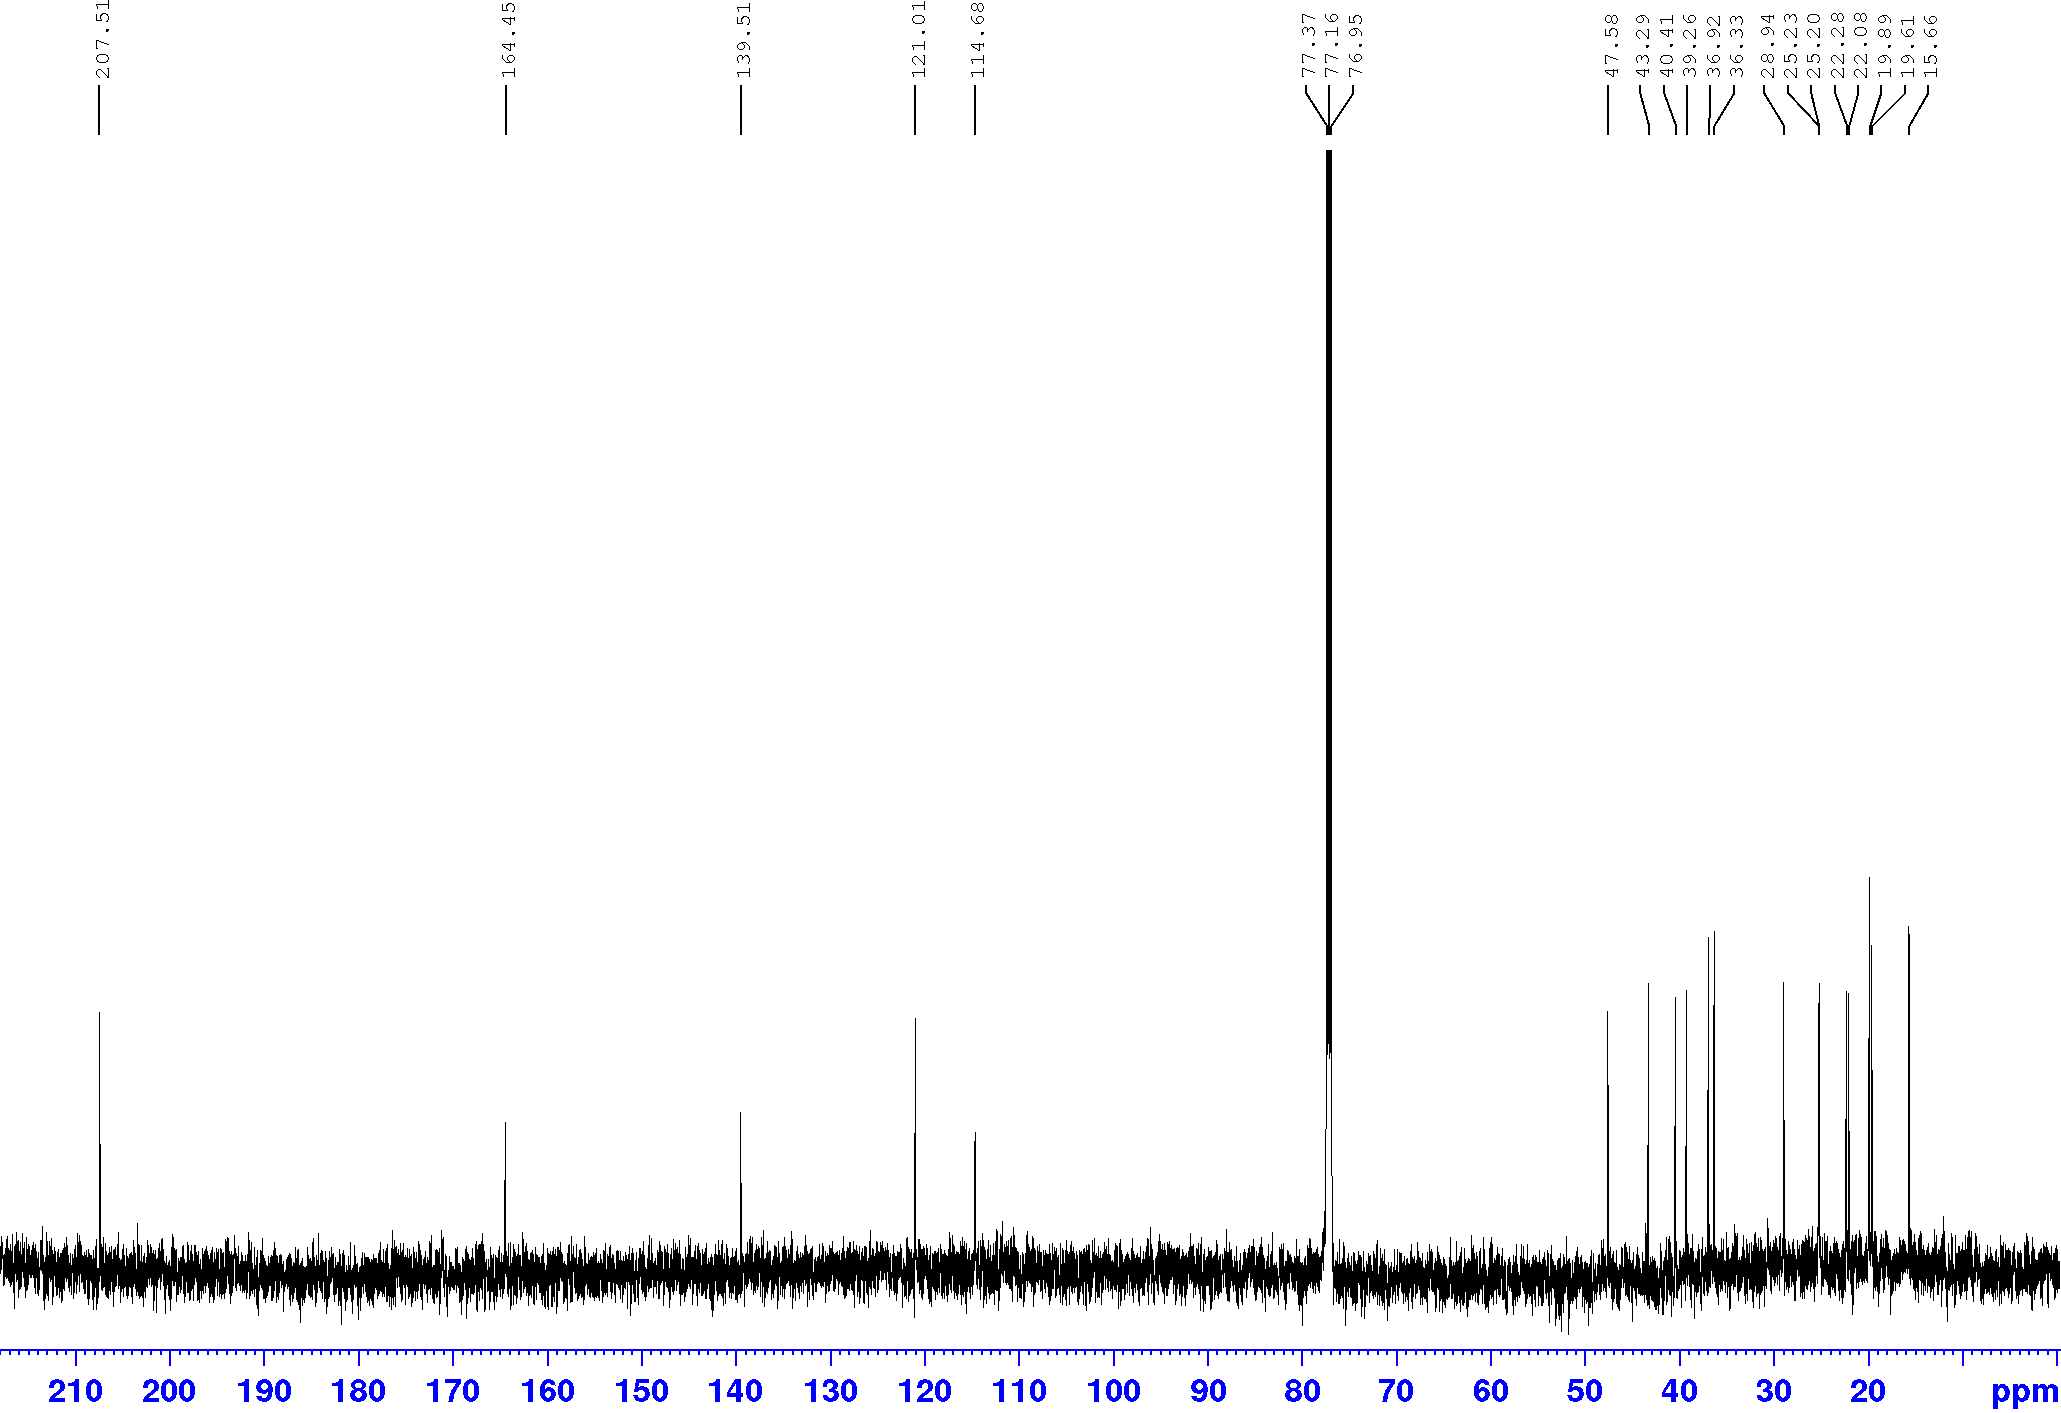


**S23.** HSQC (600.13 MHz, CDCl3) spectrum of Compound **6**.


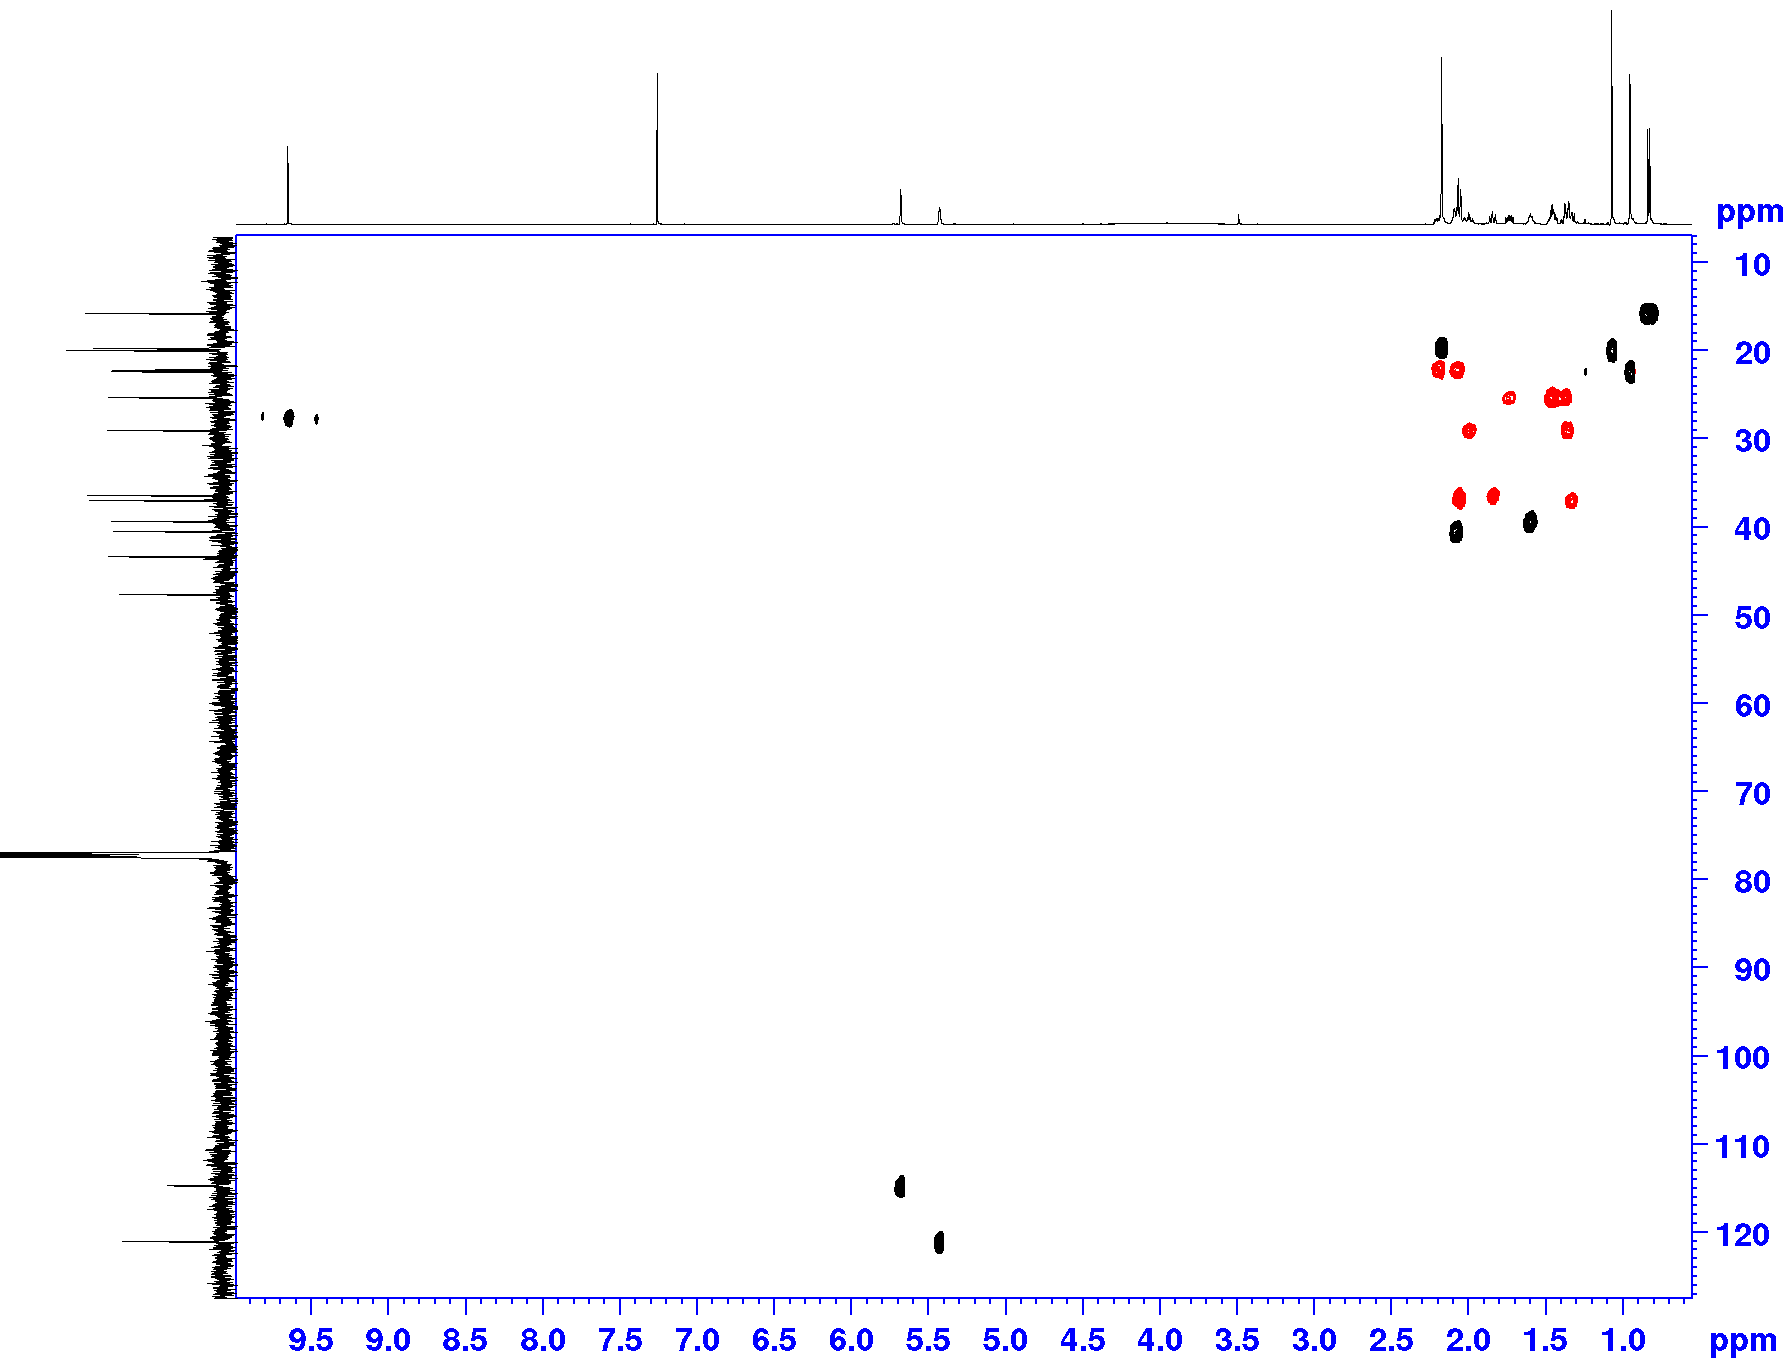


**S24.** HMBC (600.13 MHz, CDCl3) spectrum of Compound **6**.


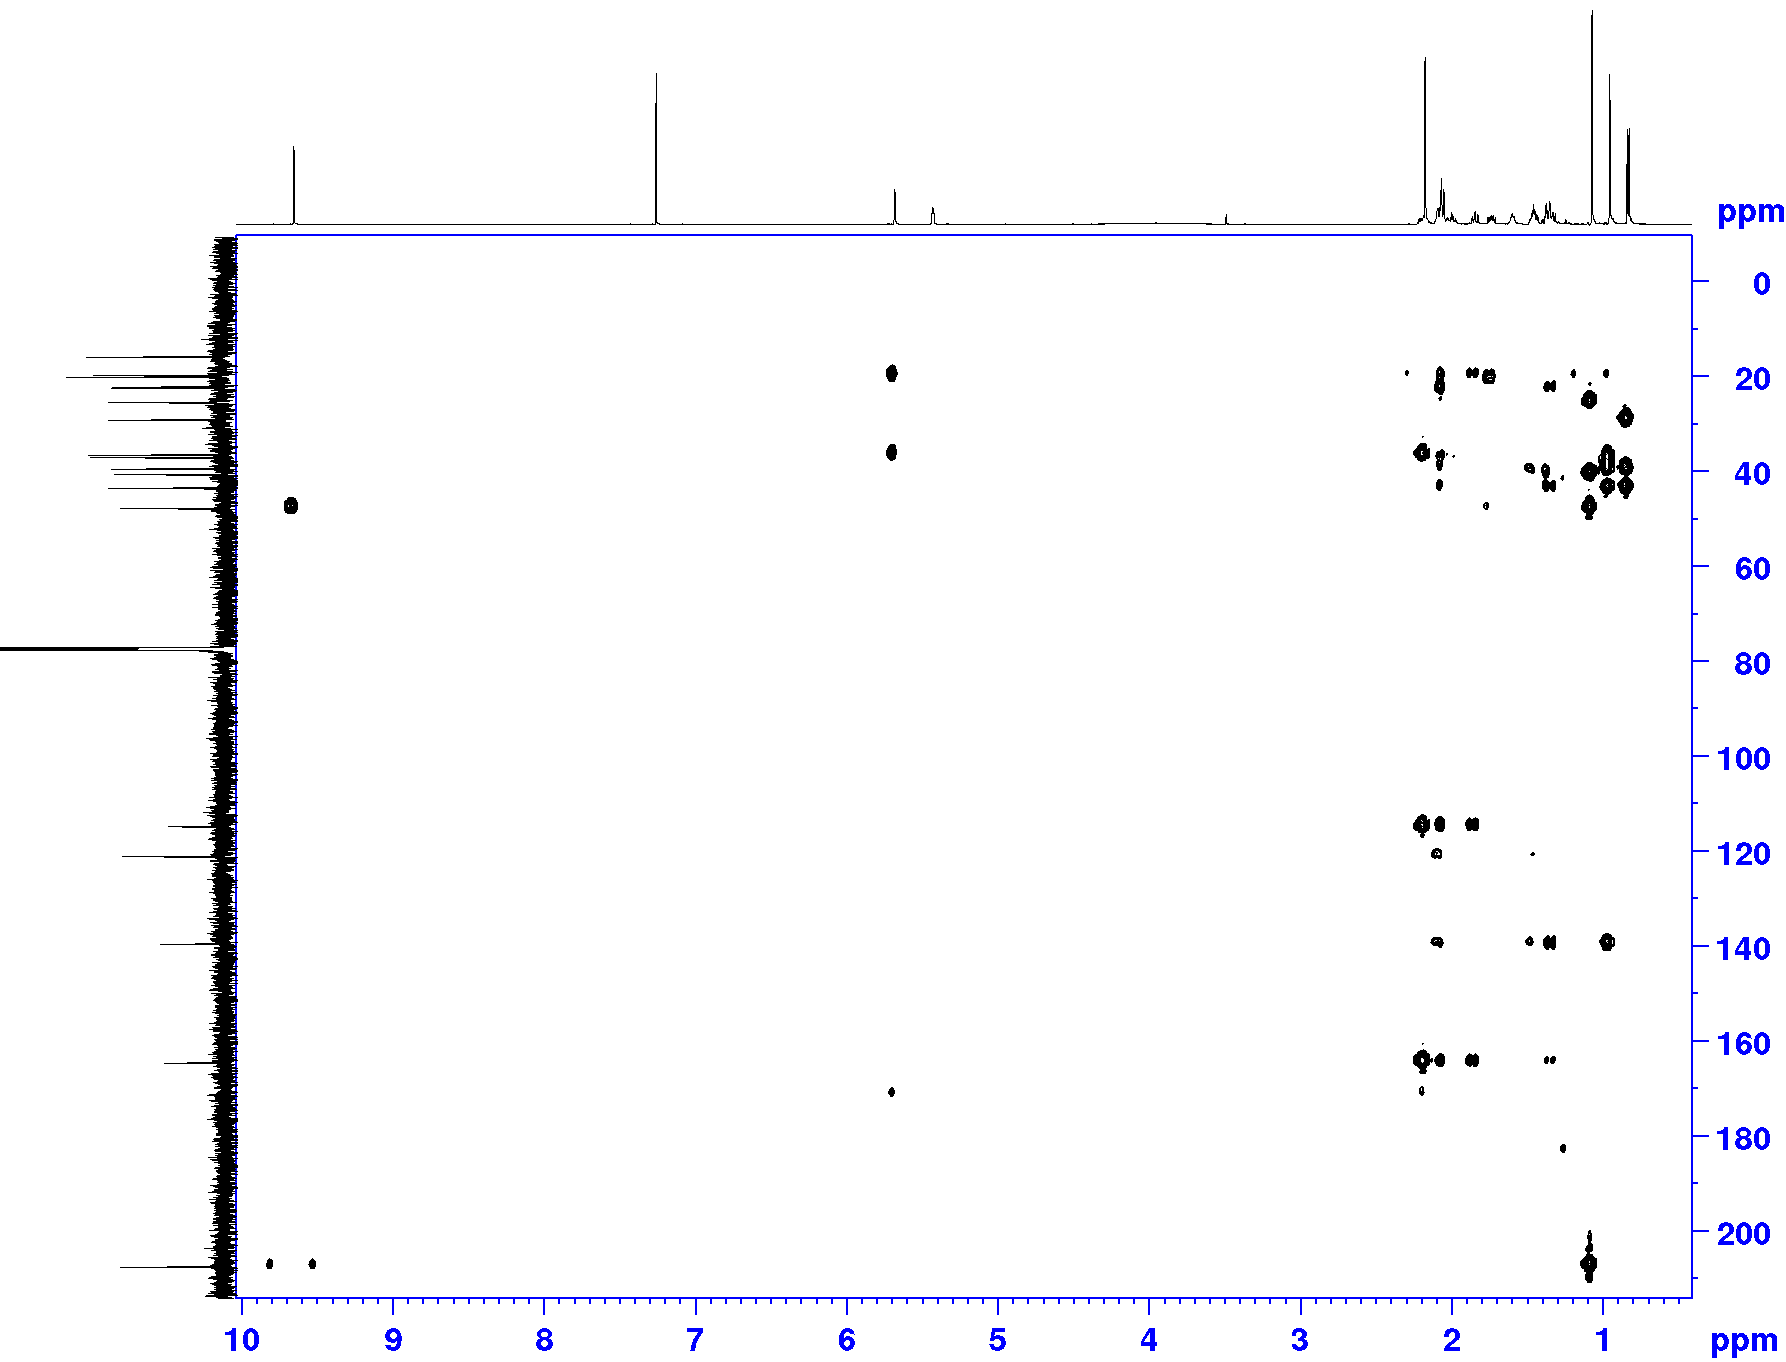


**S25.** HR-ESI-MS spectrum of Compound **7** (negative ion mode).


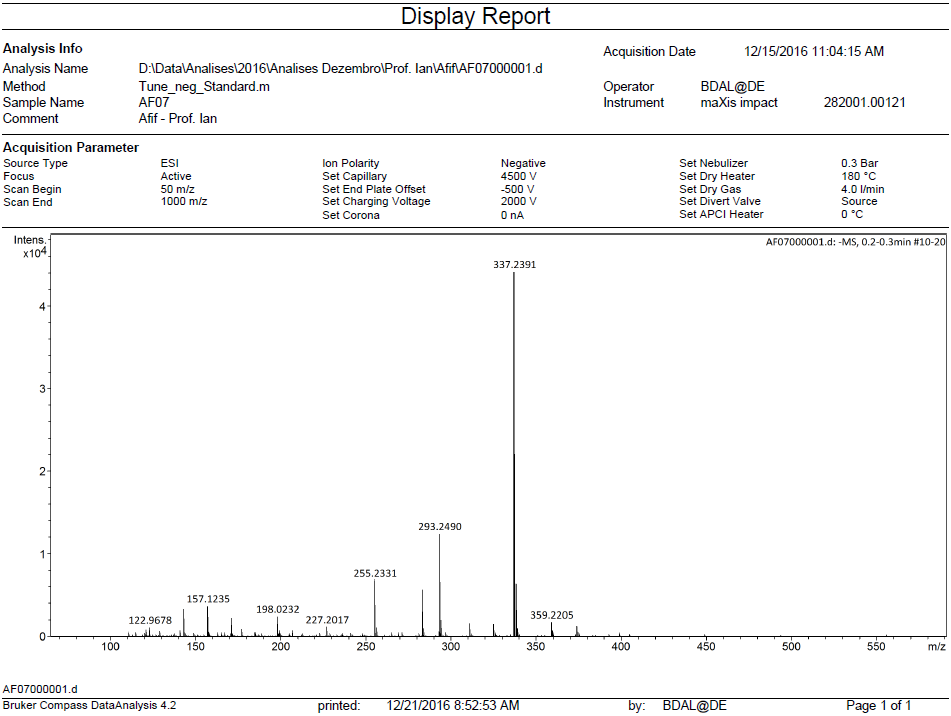


**S26.** 1H NMR (600.13 MHz, CD3OD) spectrum of Compound **7**.


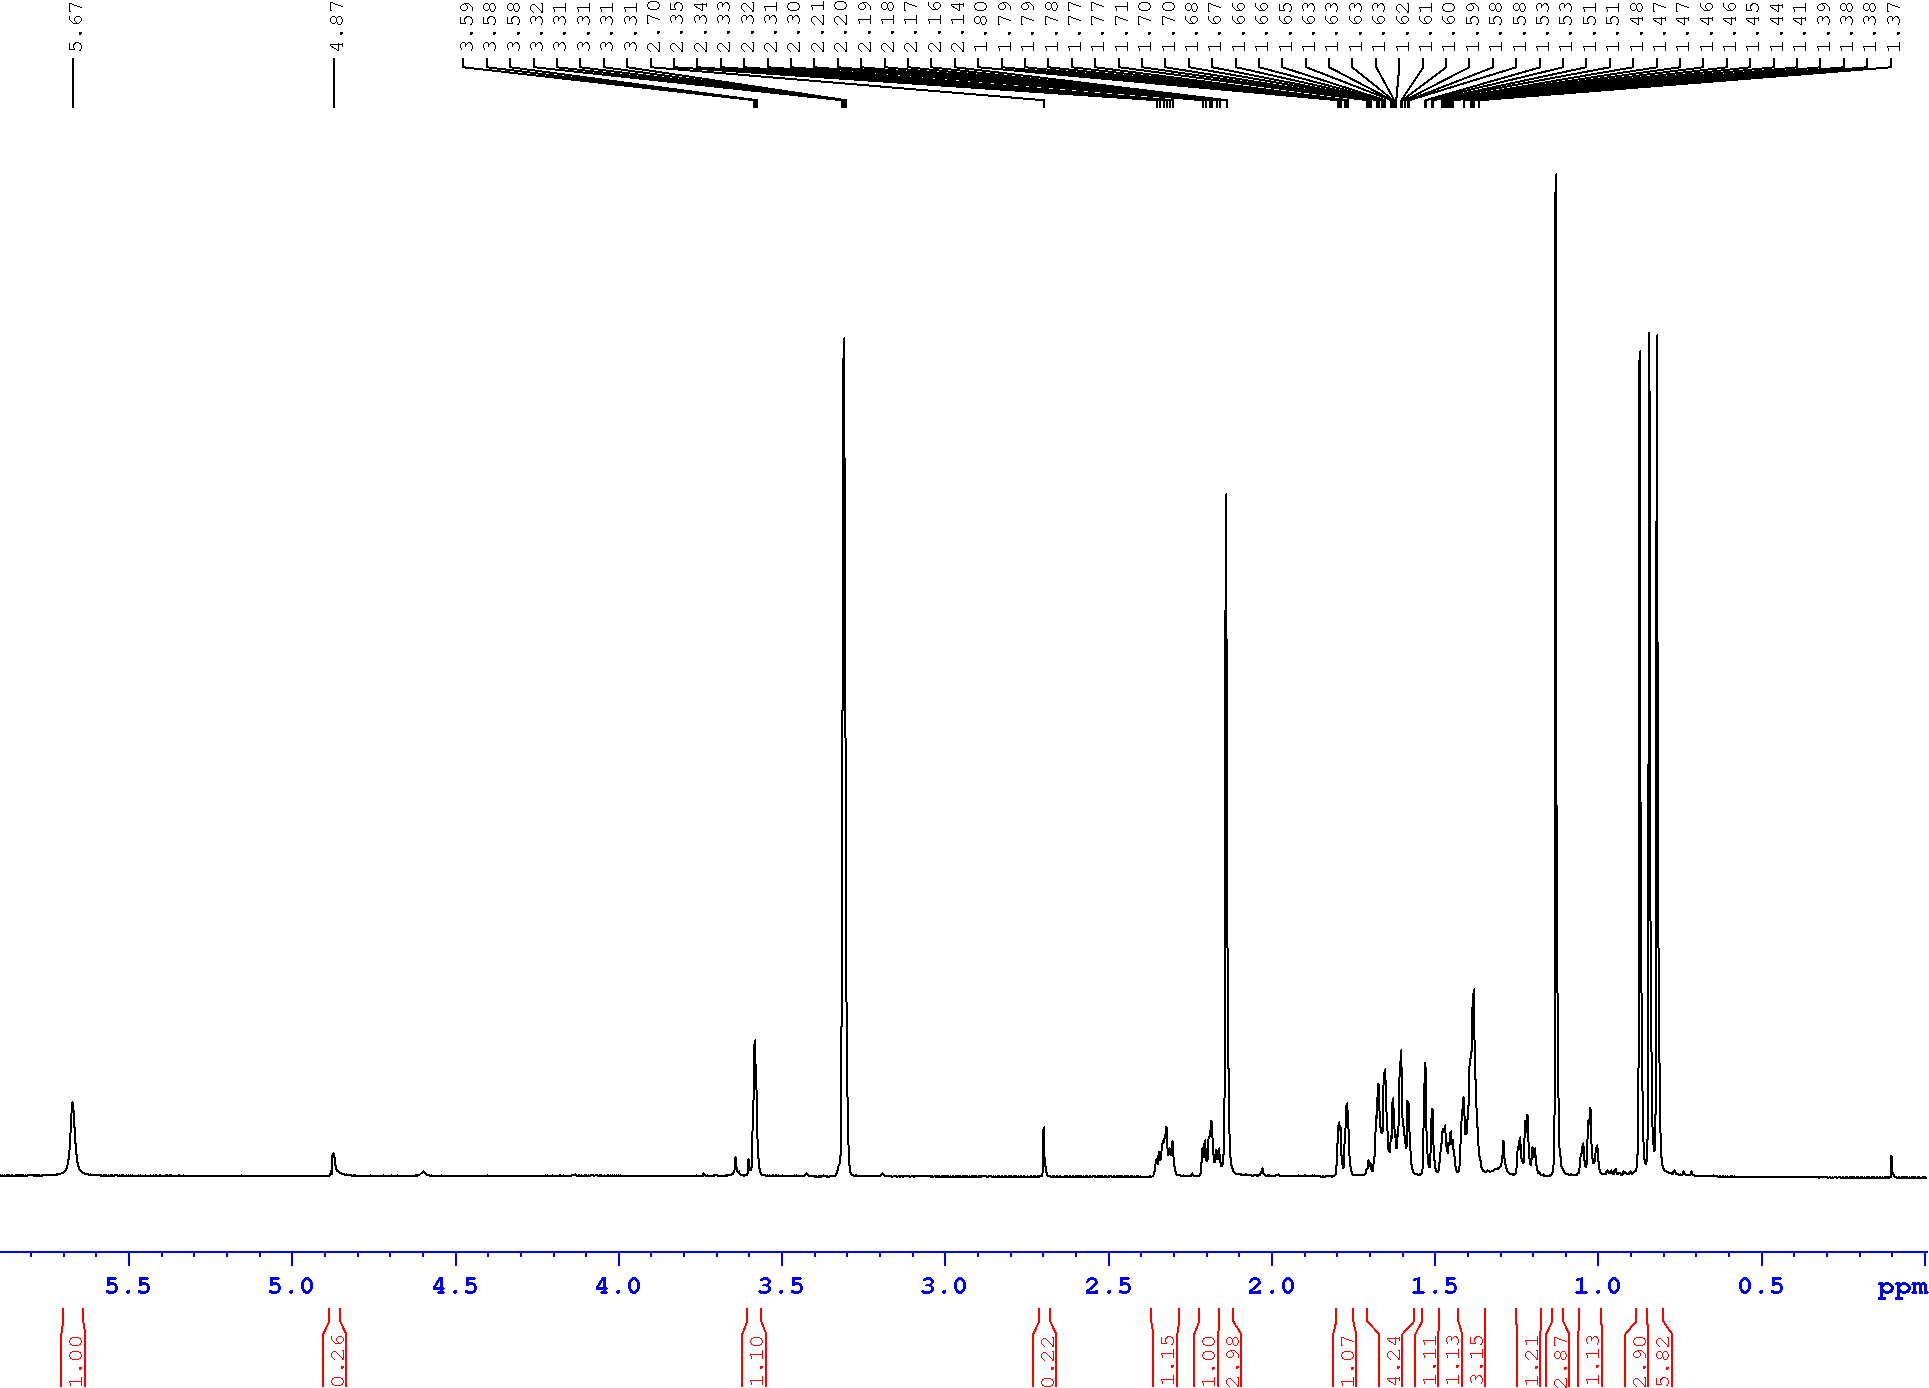


**S27.** 13C NMR (150.9 MHz, CD3OD) spectrum of Compound **7**.


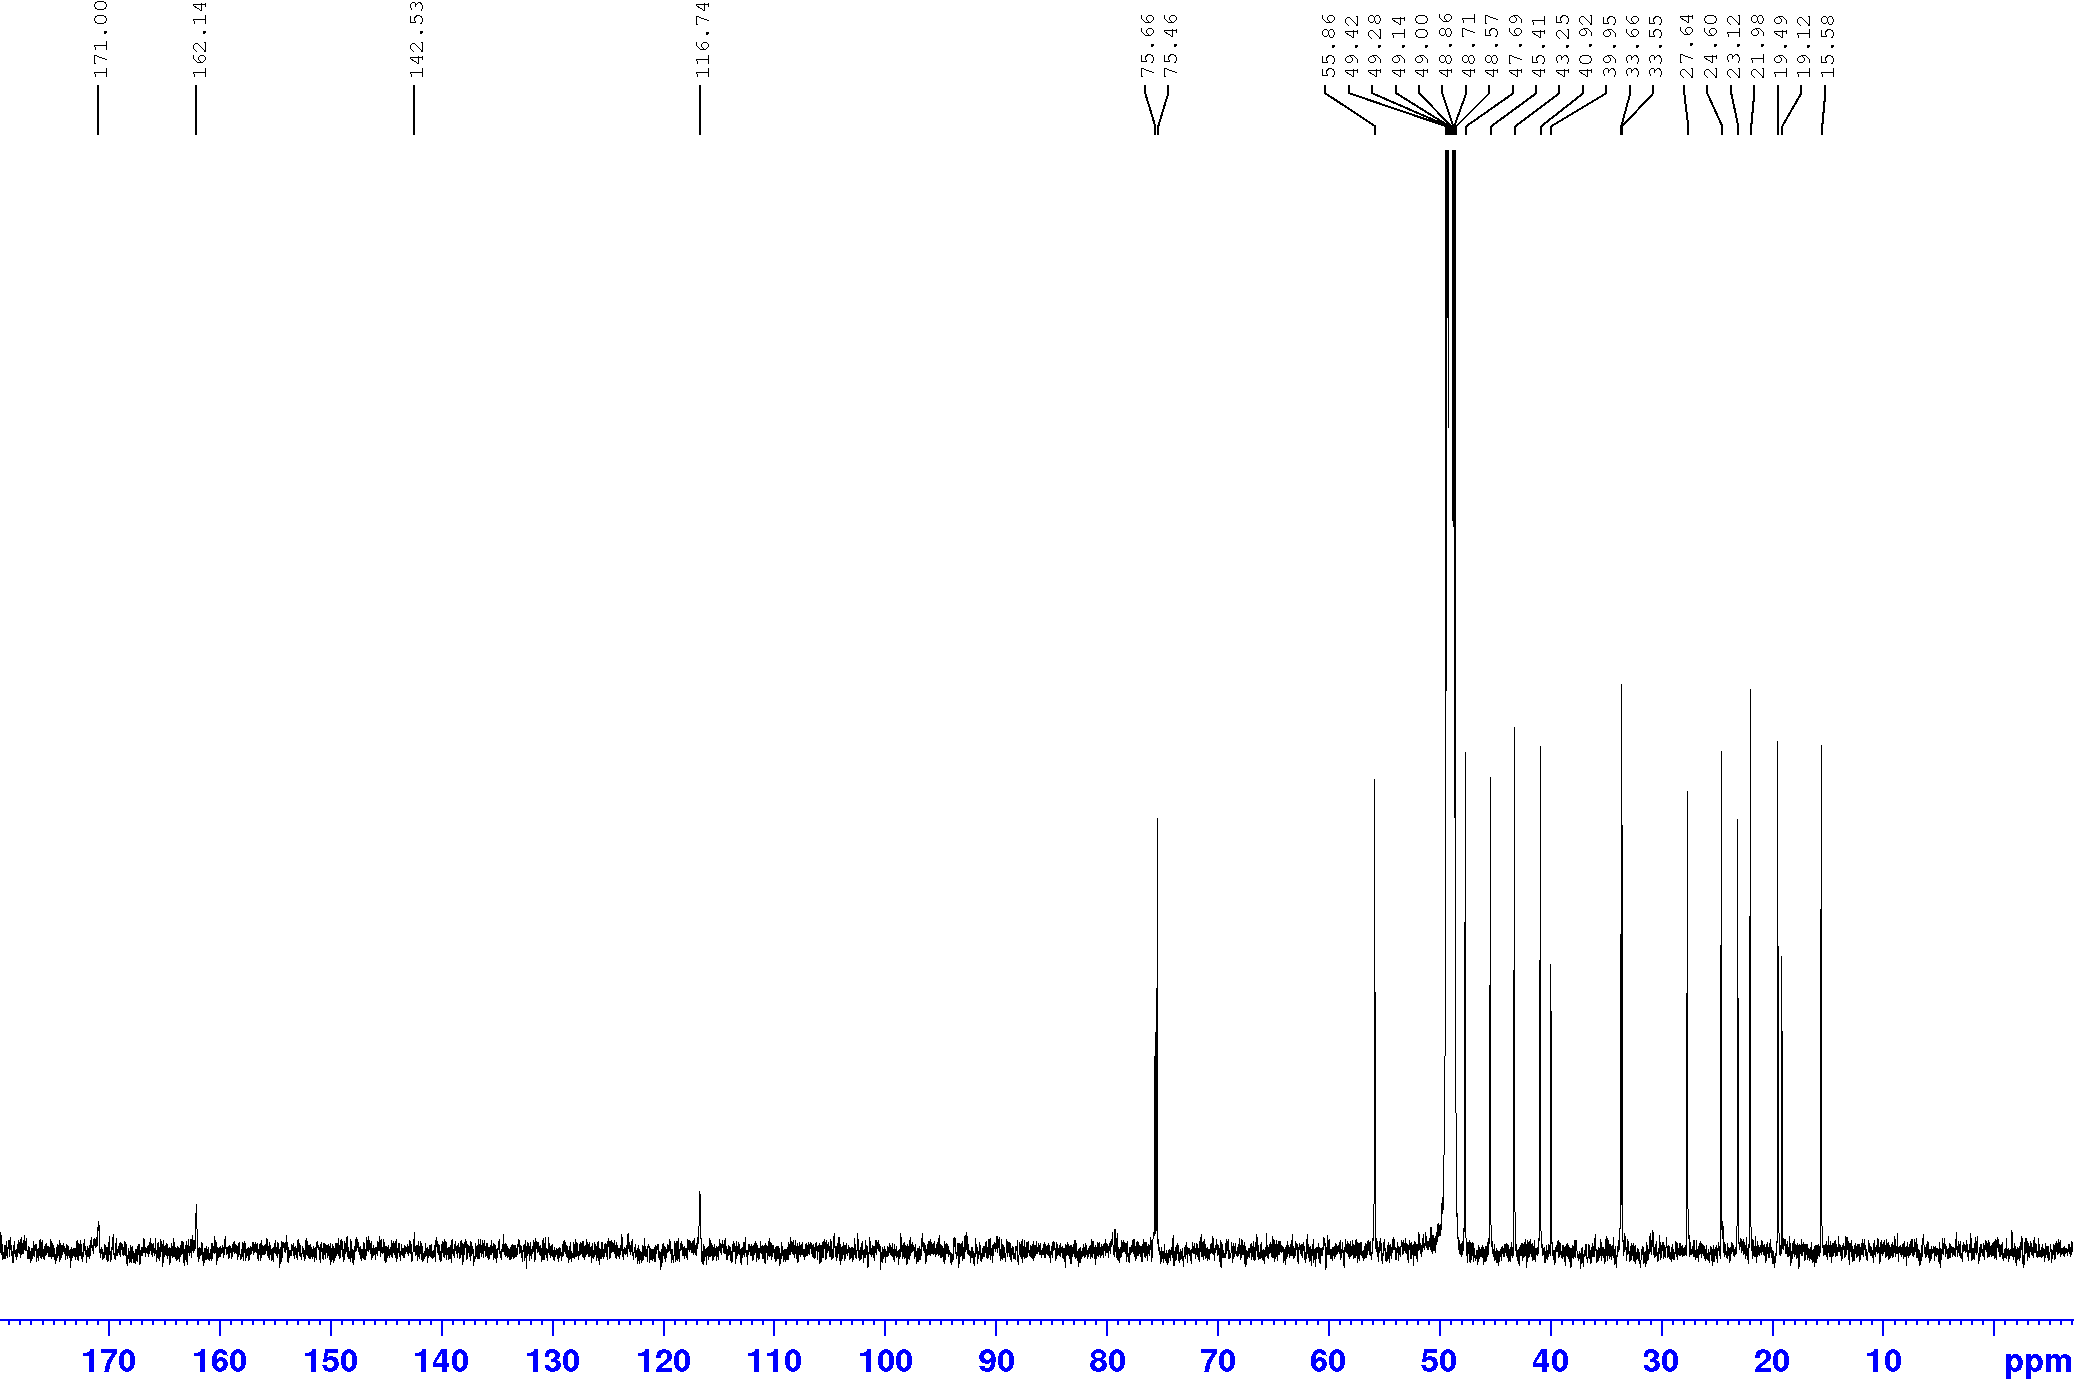


**S28.** HSQC (600.13 MHz, CD3OD) spectrum of Compound **7**.

**
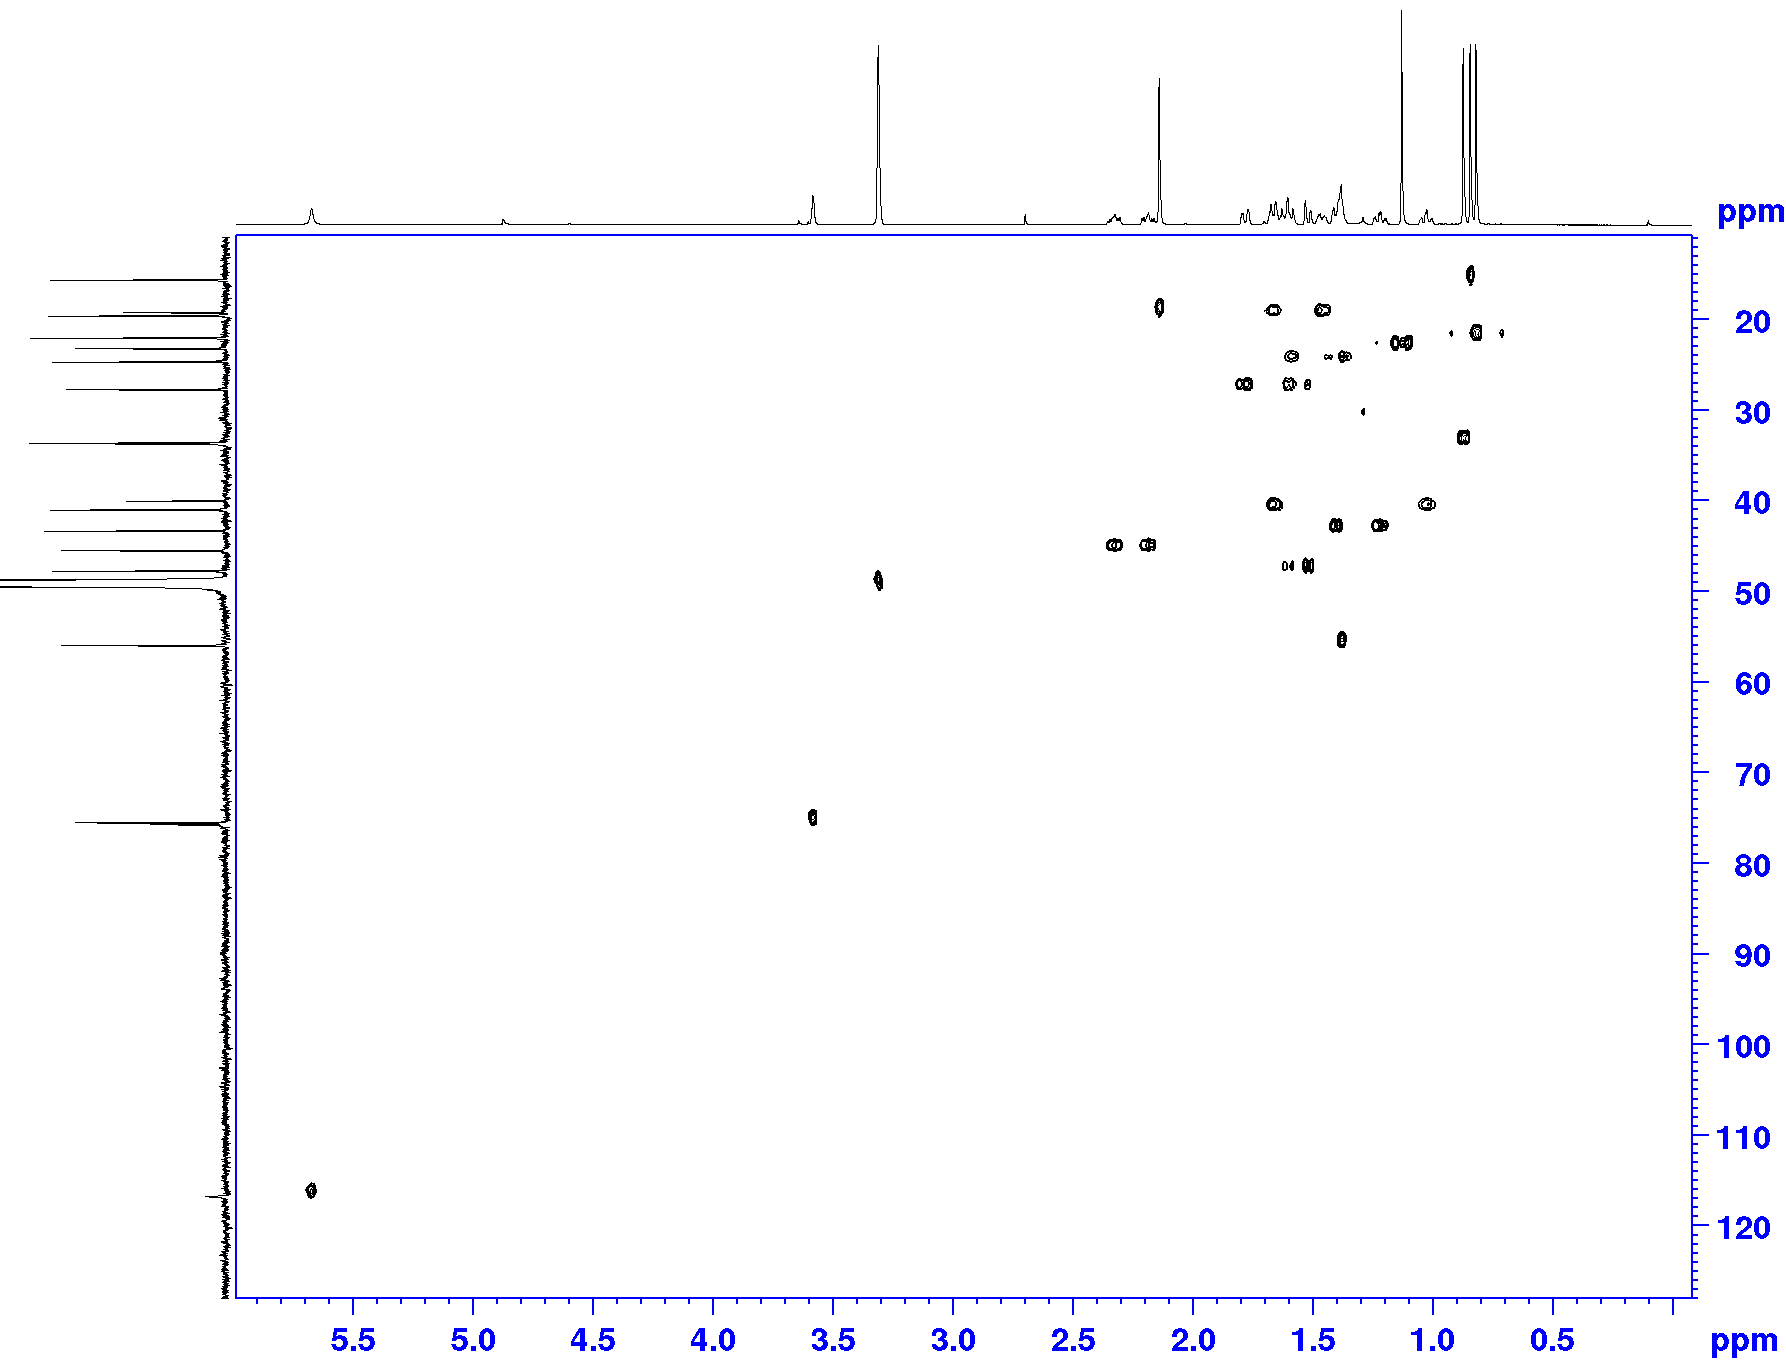
**

**S29.** HMBC (600.13 MHz, CD3OD) spectrum of Compound **7**.


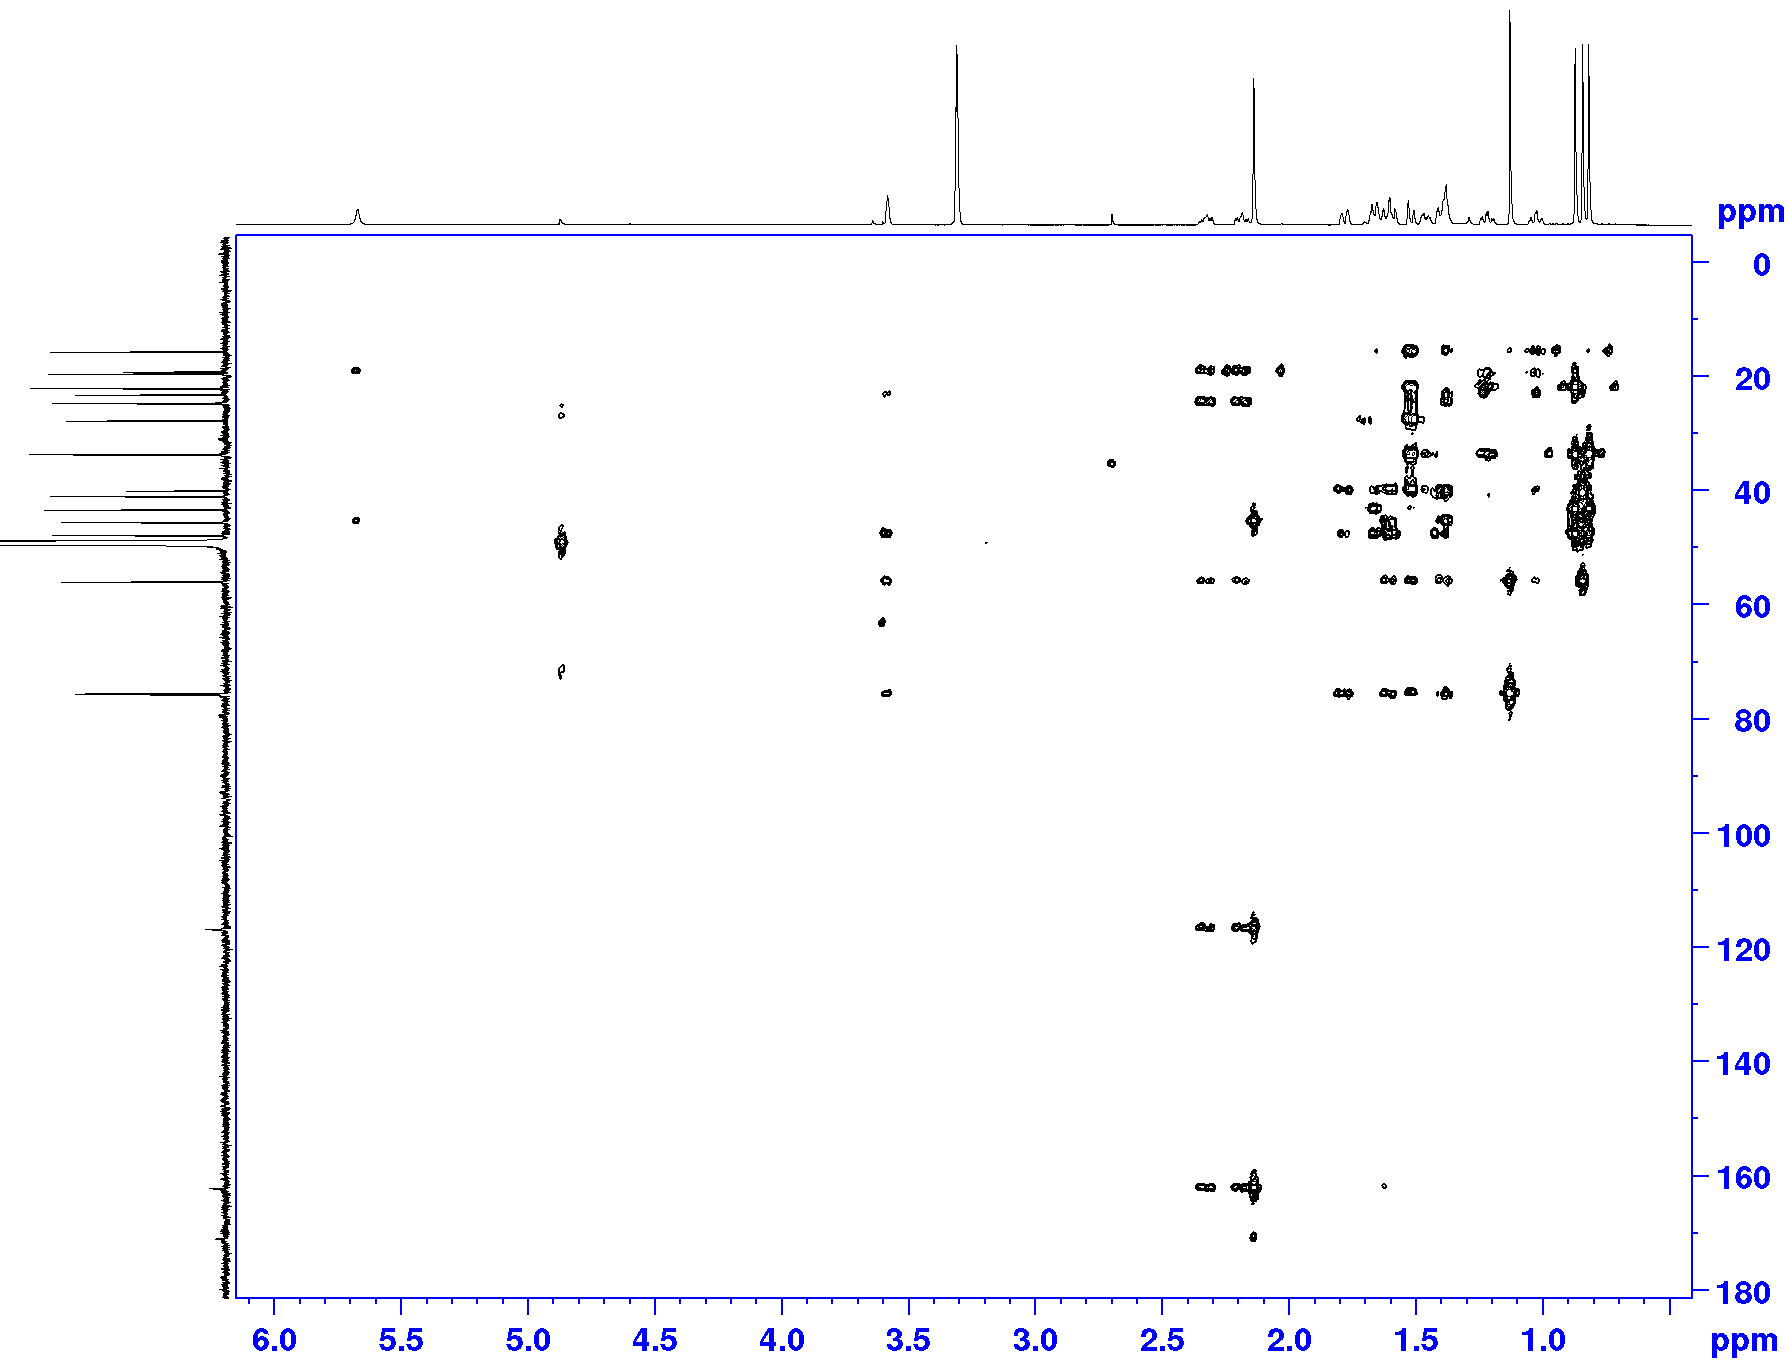


**S30.** HR-ESI-MS spectrum of Compound **8** (negative ion mode).


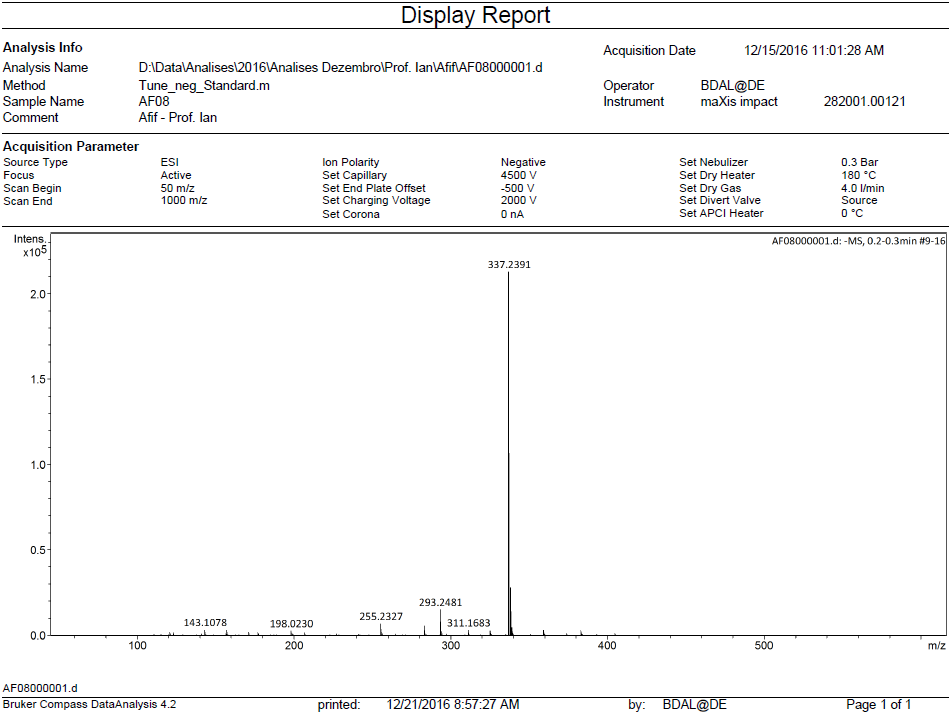


**S31.** 1H NMR (600.13 MHz, CDCl3) spectrum of Compound **8**.


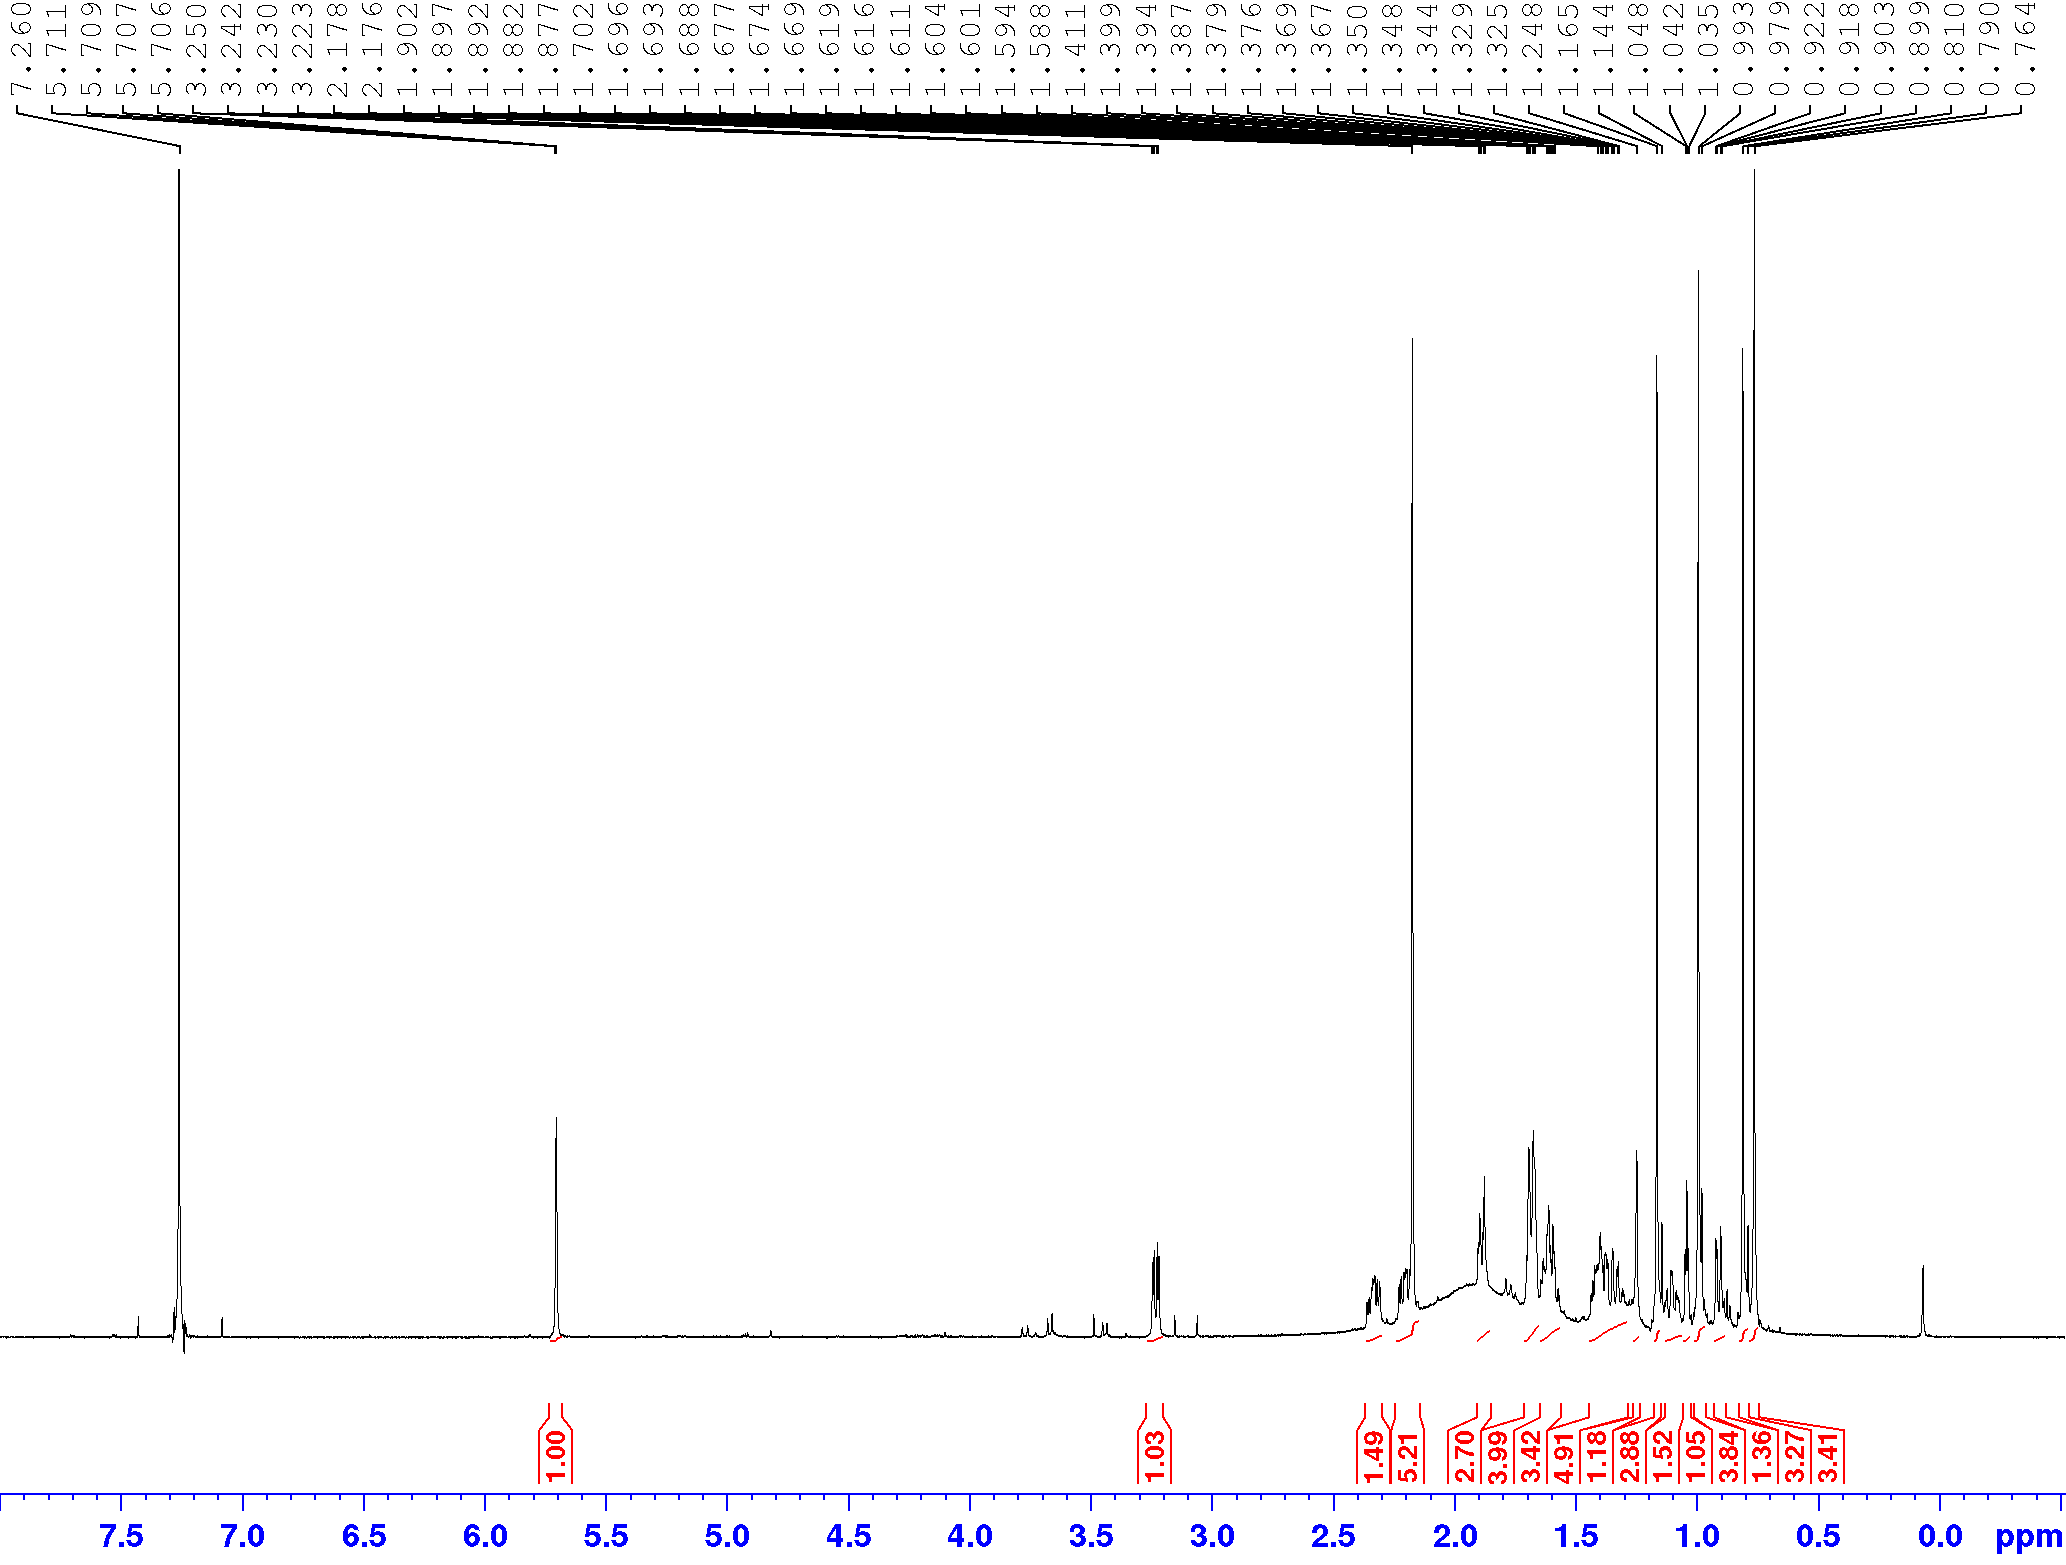


**S32.** 13C NMR (150.9 MHz, CDCl3) spectrum of Compound **8**.


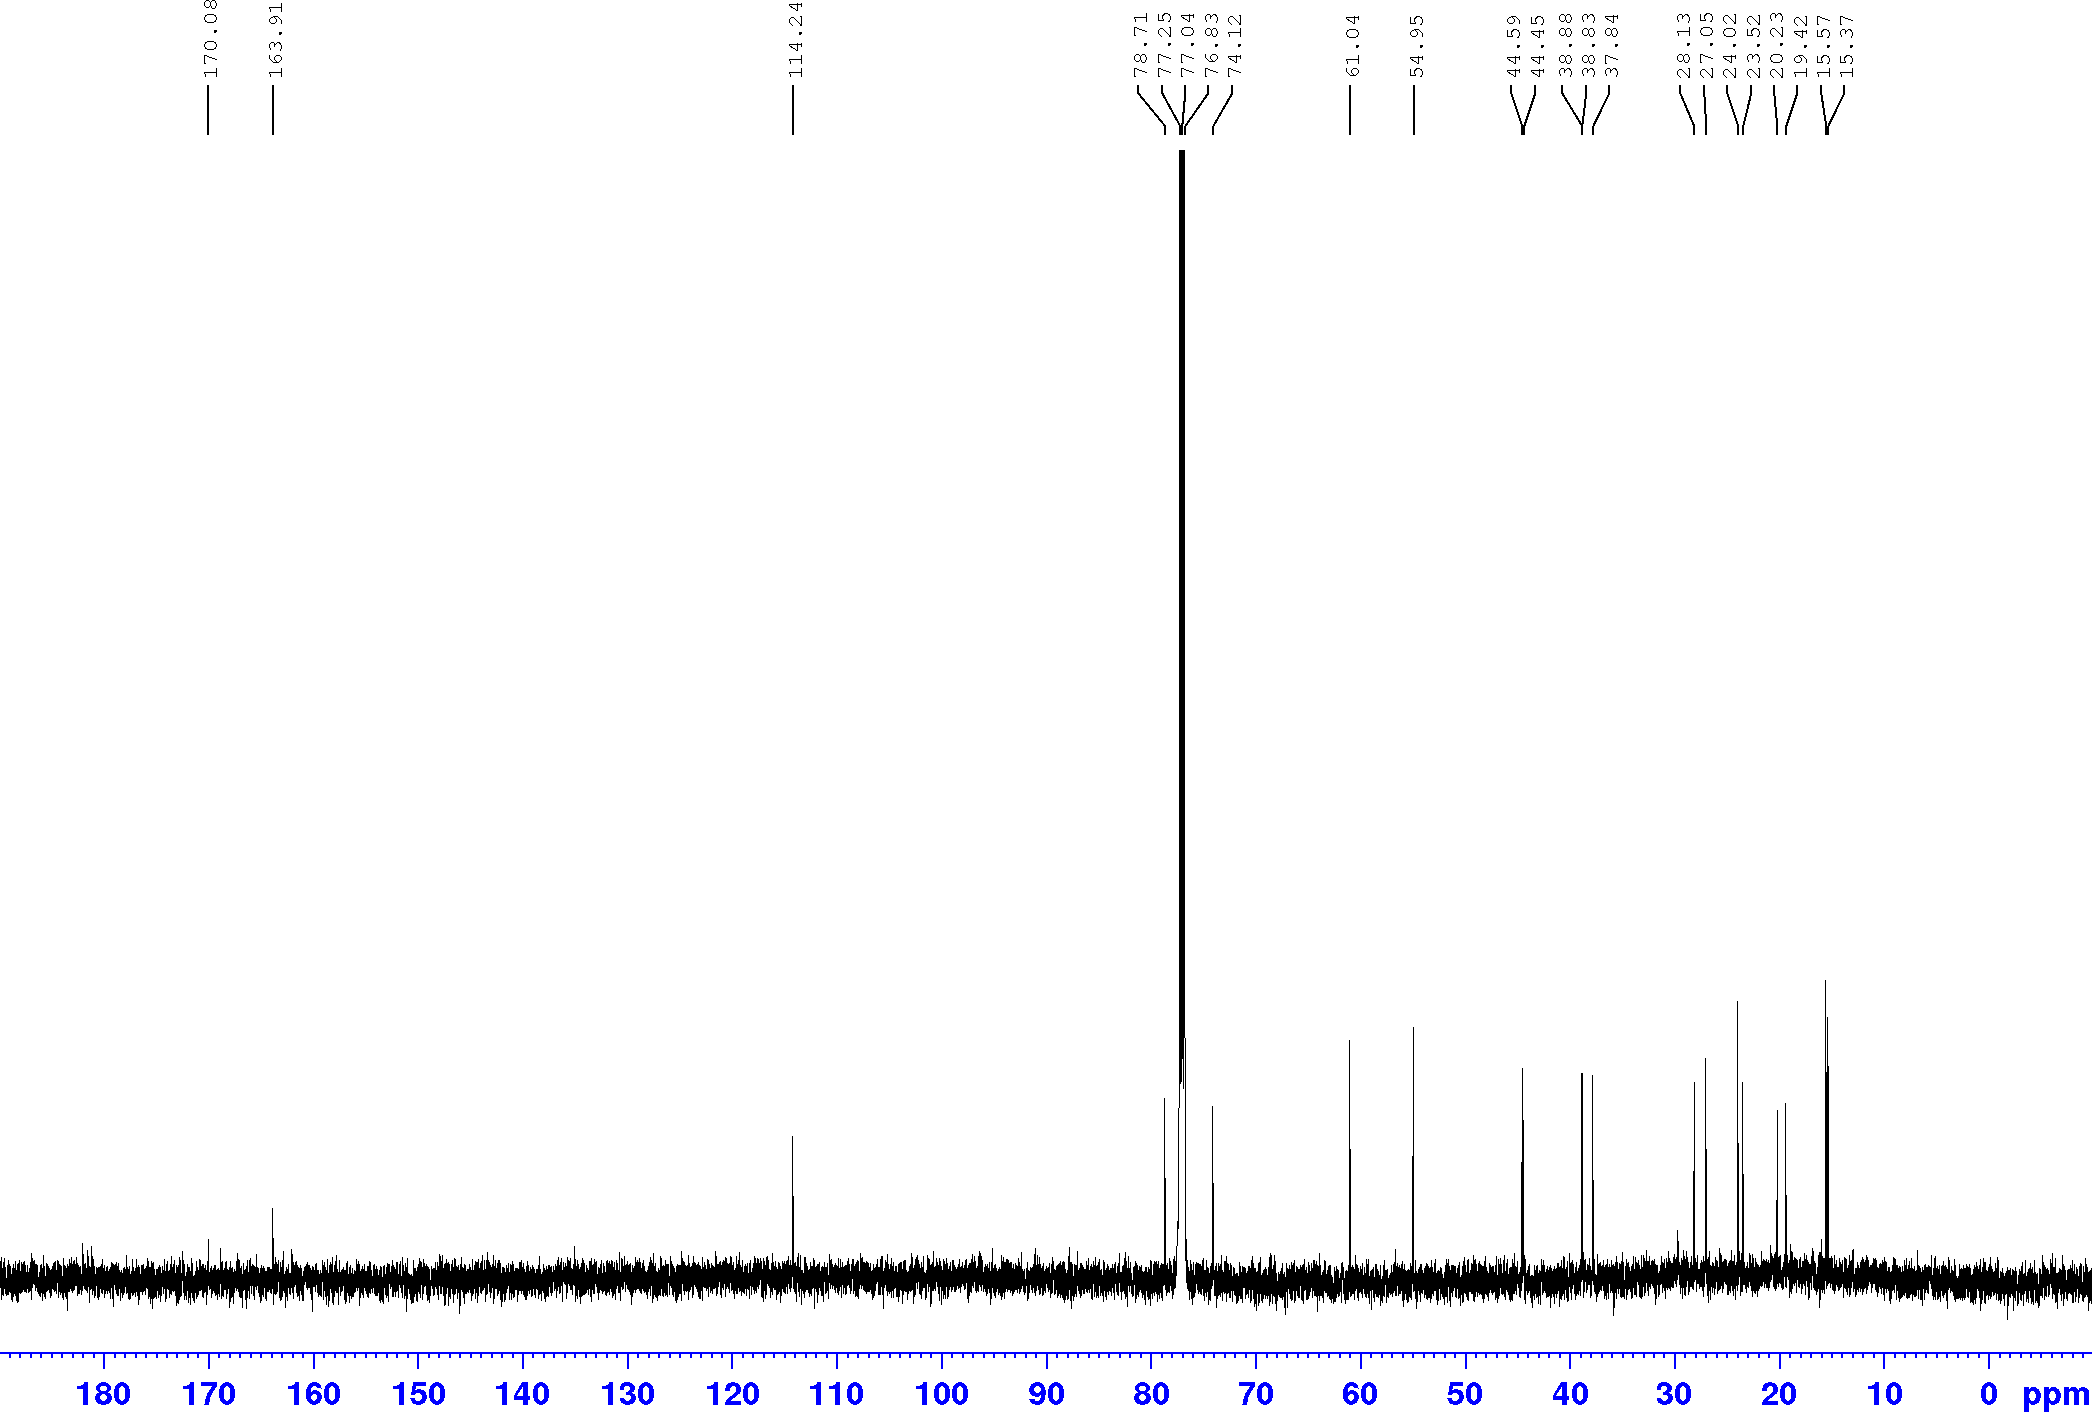


**S33.** HSQC (600.13 MHz, CDCl3) spectrum of Compound **8**.

**
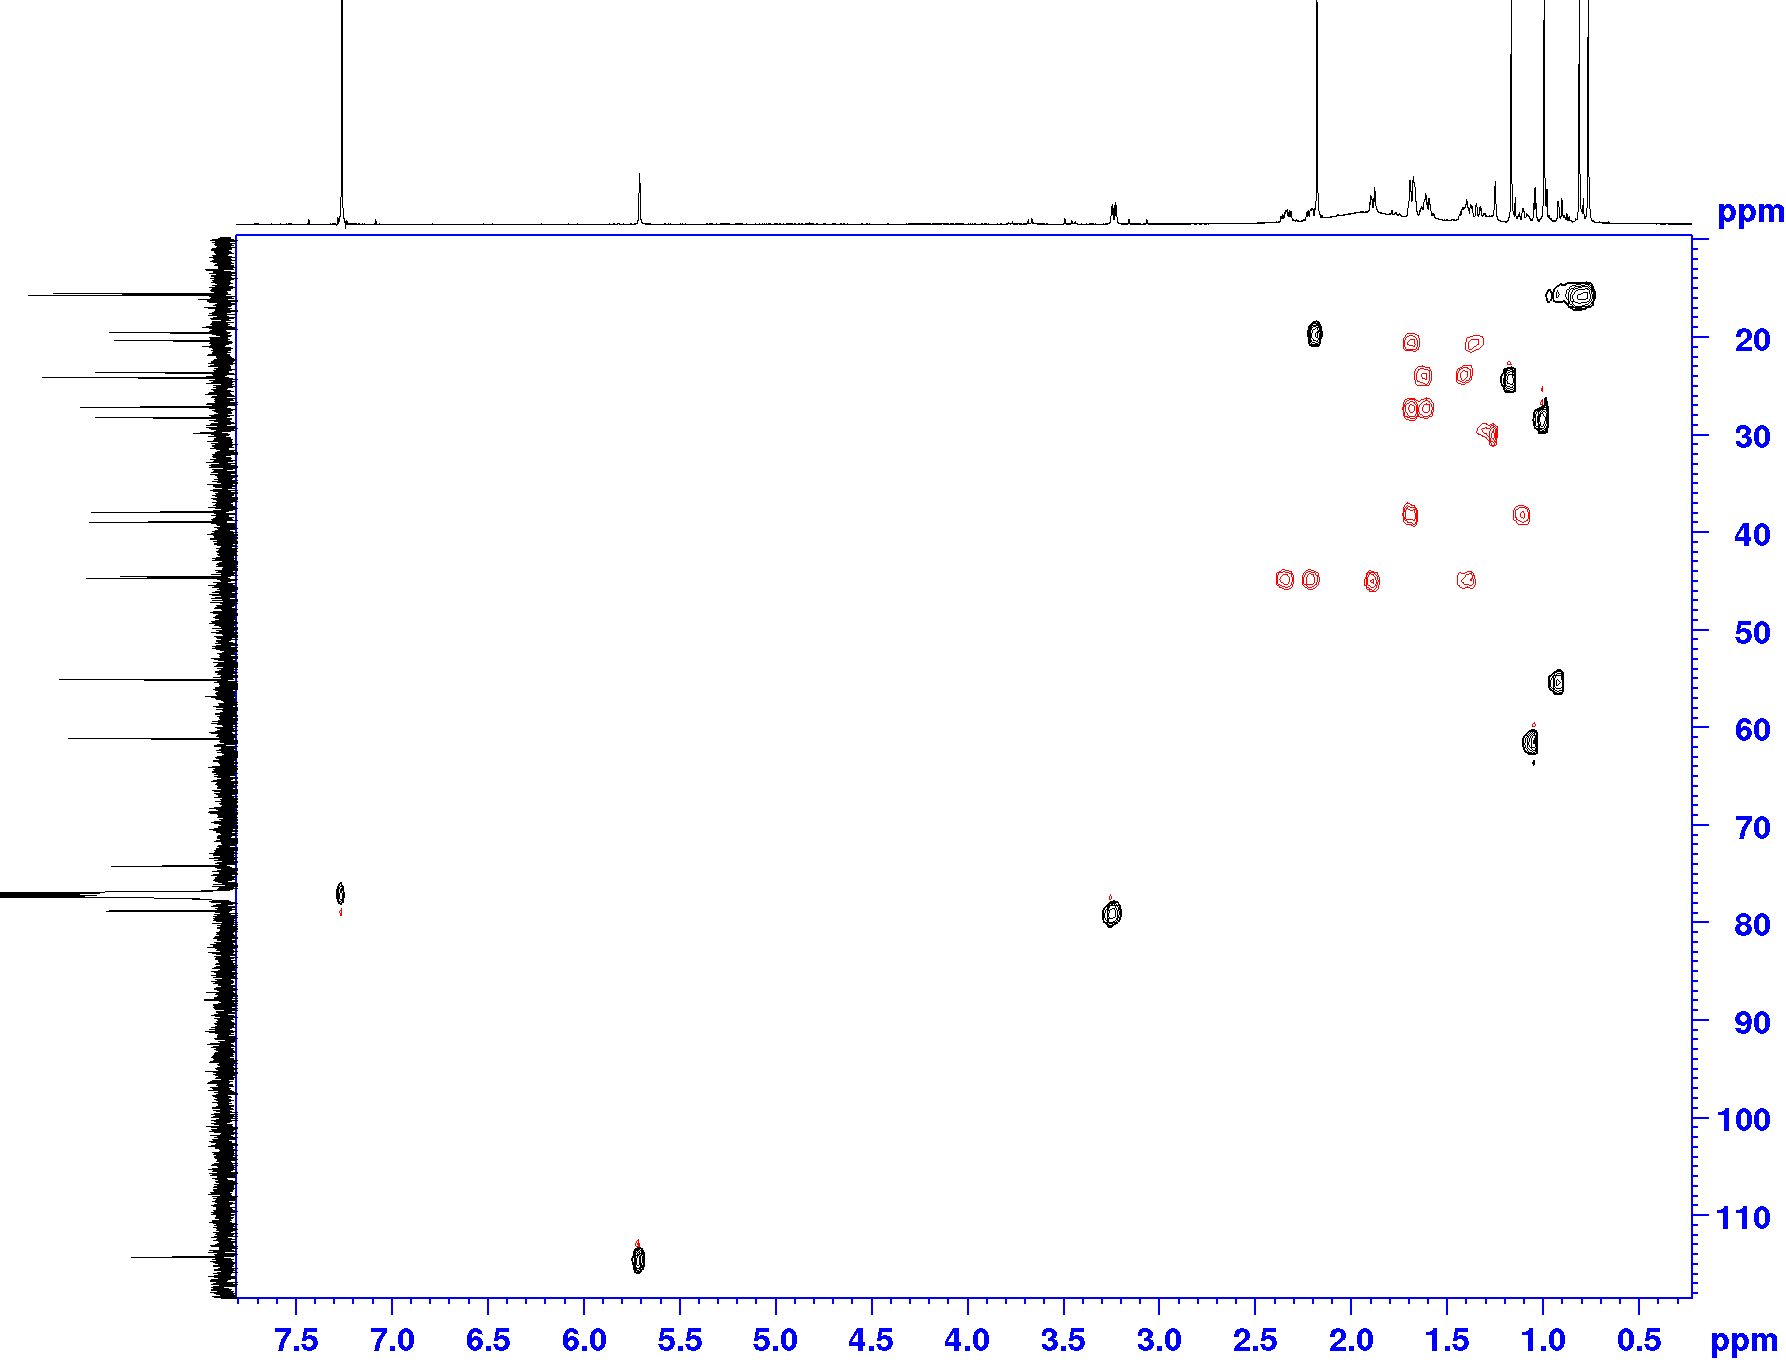
**

**S34.** HMBC (600.13 MHz, CDCl3) spectrum of Compound **8**.


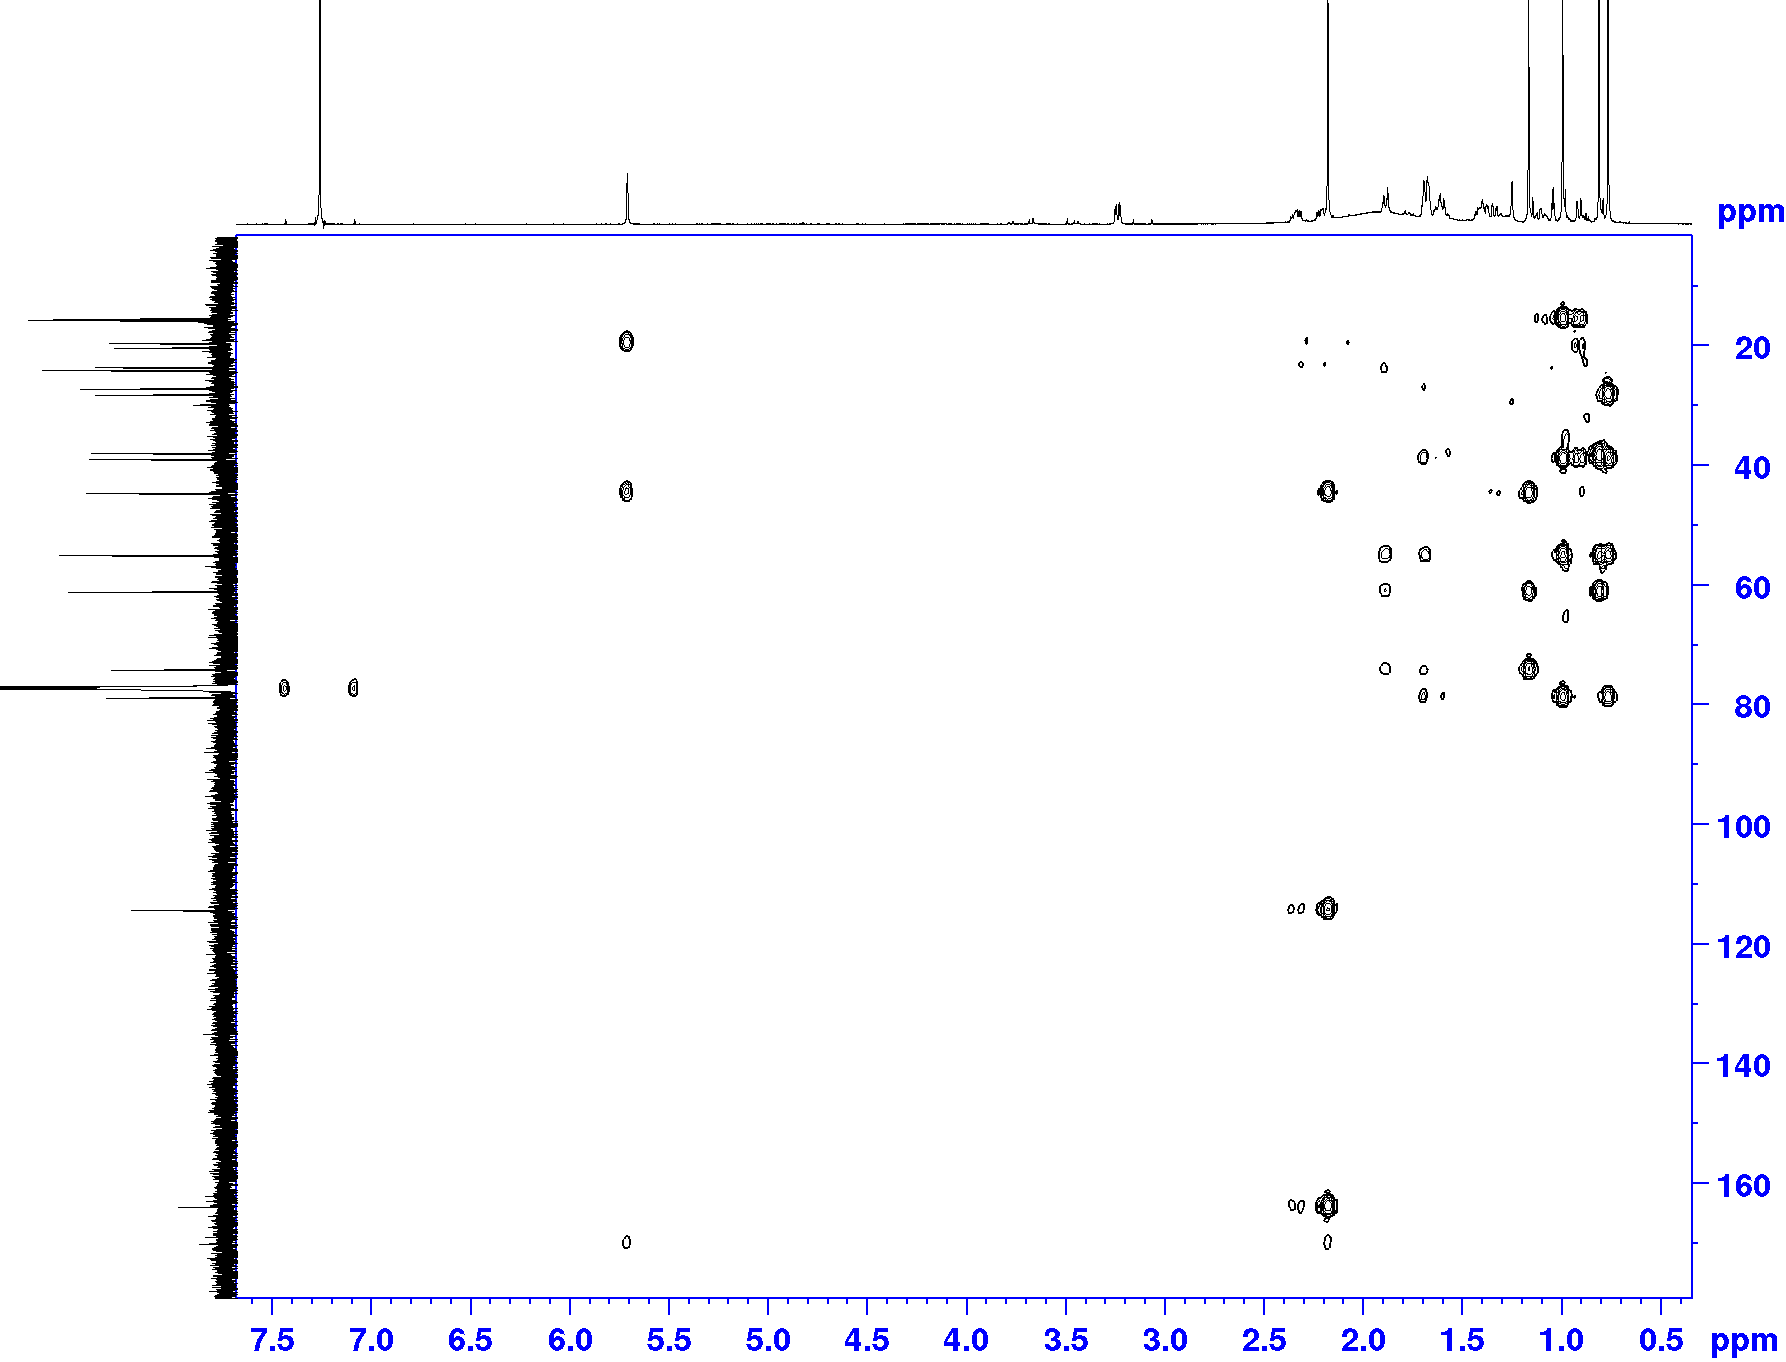

Supplement: Supplementary file 1 [file 9637849]
